# Supplementary material for: Syntheses, formation mechanisms and structures of a series of linear diborazanes
Source: Royal Society of Chemistry journal article supplement (doi:10.1039/d0ce01196g), 2020-11-16
Supplement: d0ce01196g1.pdf [file d0ce01196g1.pdf]

## Supporting Information

### **Syntheses, formation mechanisms and structures of a series of linear diborazanes**

*Huizhen Li,<sup>\*,ab</sup> Ruirui Wang,<sup>†,b</sup> Jiaxin Kang,<sup>†,b</sup> Shujun Li,<sup>b</sup> Ai-Ju Zhou,<sup>a</sup> Dong-xue Han,<sup>a</sup> Hong-Yu Guan,<sup>\*a</sup> Douglas J. Austin,<sup>c</sup> and Yanfeng Yue<sup>c</sup>*

<sup>a</sup>Center for Advanced Analytical Science, School of Chemistry and Chemical Engineering, Guangzhou University, Guangzhou 510006, P. R. China

<sup>b</sup>Henan Key Laboratory of Boron Chemistry and Advanced Energy Materials, School of Chemistry and Chemical Engineering, Henan Normal University, Xinxiang, Henan 453007, China

<sup>c</sup>Department of Chemistry, Delaware State University, Dover, DE, 19901, United States

## Table of Contents

|                                                                                                                                                                                                                                                                                                                                                                           |    |
|---------------------------------------------------------------------------------------------------------------------------------------------------------------------------------------------------------------------------------------------------------------------------------------------------------------------------------------------------------------------------|----|
| <b>1. Synthesis of diborazanes</b> .....                                                                                                                                                                                                                                                                                                                                  | 4  |
| <b>2. Supporting results</b> .....                                                                                                                                                                                                                                                                                                                                        | 11 |
| Table S1 The reactions of ADB with alkylamines. ....                                                                                                                                                                                                                                                                                                                      | 11 |
| Figure S1 Predicted pathways of the reaction between ADB and NH <sub>3</sub> based on density functional theory (DFT) calculations. ....                                                                                                                                                                                                                                  | 12 |
| Table S2a The relative energies $\{\Delta(E+ZPE)/(\text{kcal}\cdot\text{mol}^{-1})\}$ , enthalpies $\{\Delta H(298\text{ K})/(\text{kcal}\cdot\text{mol}^{-1})\}$ , free energy changes $\{\Delta G(298\text{ K})/(\text{kcal}\cdot\text{mol}^{-1})\}$ and entropy $\{S(298\text{ K})/(\text{cal}\cdot\text{mol}^{-1})\}$ for the reactions of ADB with alkylamines. .... | 13 |
| Table S2b The calculated rate constants ( $\text{ml}\cdot\text{mol}^{-1}\cdot\text{s}^{-1}$ ) of the reactions of ADB with alkylamines. ....                                                                                                                                                                                                                              | 14 |
| Figure S2 Energy profile of the reaction of ADB with alkylamines. ....                                                                                                                                                                                                                                                                                                    | 15 |
| Table S3 The nomenclature of the diborazanes.....                                                                                                                                                                                                                                                                                                                         | 15 |
| Table S4 FTIR spectra assignments of the diborazanes.....                                                                                                                                                                                                                                                                                                                 | 16 |
| Figure S3a <sup>11</sup> B NMR spectra of <b>1a</b> in THF- <i>d</i> <sub>8</sub> . ....                                                                                                                                                                                                                                                                                  | 17 |
| Figure S3b <sup>1</sup> H{ <sup>11</sup> B} NMR spectra of <b>1a</b> in THF- <i>d</i> <sub>8</sub> . ....                                                                                                                                                                                                                                                                 | 17 |
| Figure S3c <sup>13</sup> C{ <sup>1</sup> H} NMR spectra of <b>1a</b> in THF- <i>d</i> <sub>8</sub> . ....                                                                                                                                                                                                                                                                 | 17 |
| Figure S3d <sup>11</sup> B NMR spectra of <b>1b</b> in THF- <i>d</i> <sub>8</sub> . ....                                                                                                                                                                                                                                                                                  | 18 |
| Figure S3e <sup>1</sup> H{ <sup>11</sup> B} NMR spectra of <b>1b</b> in THF- <i>d</i> <sub>8</sub> . ....                                                                                                                                                                                                                                                                 | 18 |
| Figure S3f <sup>13</sup> C{ <sup>1</sup> H} NMR spectra of <b>1b</b> in THF- <i>d</i> <sub>8</sub> . ....                                                                                                                                                                                                                                                                 | 18 |
| Figure S3g <sup>11</sup> B NMR spectra of <b>1c</b> in THF- <i>d</i> <sub>8</sub> . ....                                                                                                                                                                                                                                                                                  | 19 |
| Figure S3h <sup>1</sup> H{ <sup>11</sup> B} NMR spectra of <b>1c</b> in THF- <i>d</i> <sub>8</sub> . ....                                                                                                                                                                                                                                                                 | 19 |
| Figure S3i <sup>13</sup> C{ <sup>1</sup> H} NMR spectra of <b>1c</b> in THF- <i>d</i> <sub>8</sub> . ....                                                                                                                                                                                                                                                                 | 19 |
| Figure S3j <sup>11</sup> B NMR spectra of <b>2a</b> in THF- <i>d</i> <sub>8</sub> . ....                                                                                                                                                                                                                                                                                  | 20 |
| Figure S3k <sup>1</sup> H{ <sup>11</sup> B} NMR spectra of <b>2a</b> in THF- <i>d</i> <sub>8</sub> . ....                                                                                                                                                                                                                                                                 | 20 |
| Figure S3l <sup>13</sup> C{ <sup>1</sup> H} NMR spectra of <b>2a</b> in THF- <i>d</i> <sub>8</sub> . ....                                                                                                                                                                                                                                                                 | 20 |
| Figure S3m <sup>11</sup> B NMR spectra of <b>2c</b> in THF- <i>d</i> <sub>8</sub> . ....                                                                                                                                                                                                                                                                                  | 21 |
| Figure S3n <sup>1</sup> H{ <sup>11</sup> B} NMR spectra of <b>2c</b> in THF- <i>d</i> <sub>8</sub> . ....                                                                                                                                                                                                                                                                 | 21 |
| Figure S3o <sup>13</sup> C{ <sup>1</sup> H} NMR spectra of <b>2c</b> in THF- <i>d</i> <sub>8</sub> . ....                                                                                                                                                                                                                                                                 | 21 |
| Figure S3p <sup>11</sup> B NMR spectra of <b>3a</b> in THF- <i>d</i> <sub>8</sub> . ....                                                                                                                                                                                                                                                                                  | 22 |
| Figure S3q <sup>1</sup> H{ <sup>11</sup> B} NMR spectra of <b>3a</b> in THF- <i>d</i> <sub>8</sub> . ....                                                                                                                                                                                                                                                                 | 22 |
| Figure S3r <sup>13</sup> C{ <sup>1</sup> H} NMR spectra of <b>3a</b> in THF- <i>d</i> <sub>8</sub> . ....                                                                                                                                                                                                                                                                 | 22 |
| Figure S3s <sup>11</sup> B NMR spectra of <b>3c</b> in THF- <i>d</i> <sub>8</sub> . ....                                                                                                                                                                                                                                                                                  | 23 |
| Figure S3t <sup>1</sup> H{ <sup>11</sup> B} NMR spectra of <b>3c</b> in THF- <i>d</i> <sub>8</sub> . ....                                                                                                                                                                                                                                                                 | 23 |
| Figure S3u <sup>13</sup> C{ <sup>1</sup> H} NMR spectra of <b>3c</b> in THF- <i>d</i> <sub>8</sub> . ....                                                                                                                                                                                                                                                                 | 23 |
| Figure S3v <sup>11</sup> B NMR spectra of <b>3d</b> in THF- <i>d</i> <sub>8</sub> . ....                                                                                                                                                                                                                                                                                  | 24 |
| Figure S3w <sup>1</sup> H{ <sup>11</sup> B} NMR spectra of <b>3d</b> in THF- <i>d</i> <sub>8</sub> . ....                                                                                                                                                                                                                                                                 | 24 |
| Figure S3x <sup>13</sup> C{ <sup>1</sup> H} NMR spectra of <b>3d</b> in THF- <i>d</i> <sub>8</sub> . ....                                                                                                                                                                                                                                                                 | 24 |
| Figure S3y X-ray powder diffraction data of <b>1a</b> . ....                                                                                                                                                                                                                                                                                                              | 25 |
| Figure S3z X-ray powder diffraction data of <b>1b</b> . ....                                                                                                                                                                                                                                                                                                              | 25 |
| Figure S3aa X-ray powder diffraction data of <b>1c</b> . ....                                                                                                                                                                                                                                                                                                             | 26 |
| Figure S3ab X-ray powder diffraction data of <b>2a</b> . ....                                                                                                                                                                                                                                                                                                             | 26 |
| Figure S3ac X-ray powder diffraction data of <b>3a</b> . ....                                                                                                                                                                                                                                                                                                             | 27 |

|                                                                                                                                    |           |
|------------------------------------------------------------------------------------------------------------------------------------|-----------|
| Figure S3ad X-ray powder diffraction data of <b>3c</b> .....                                                                       | 27        |
| Figure S3ae X-ray powder diffraction data of <b>3d</b> .....                                                                       | 28        |
| Figure S4 The <sup>11</sup> B NMR chemical shift of the diborazanes.....                                                           | 28        |
| Table S5 The experiment and calculated chemical shifts of B in the diborazanes.....                                                | 29        |
| Table S6 The chemical shifts of H in the diborazanes.....                                                                          | 30        |
| Table S7 Bond angles and dihedral angles of the diborazanes.....                                                                   | 31        |
| Table S8 Bond lengths of the diborazanes.....                                                                                      | 31        |
| Table S9 The inter-/intramolecular DHBs and hydrogen bond (HB) of the diborazanes.* .....                                          | 32        |
| Figure S5a Intermolecular DHBs of <b>1a</b> .....                                                                                  | 33        |
| Figure S5b Intramolecular DHBs of <b>1a</b> .....                                                                                  | 33        |
| Figure S5c Intermolecular DHBs of <b>1b</b> .....                                                                                  | 34        |
| Figure S5d Intramolecular DHBs of <b>1b</b> .....                                                                                  | 34        |
| Figure S5e Intermolecular DHBs of <b>1c</b> .....                                                                                  | 35        |
| Figure S5f Intramolecular DHBs of <b>1c</b> .....                                                                                  | 35        |
| Figure S5g Intermolecular DHBs of C <sub>12</sub> H <sub>24</sub> O <sub>6</sub> · <b>2a</b> .....                                 | 36        |
| Figure S5h Intramolecular DHBs of C <sub>12</sub> H <sub>24</sub> O <sub>6</sub> · <b>2a</b> .....                                 | 36        |
| Figure S5i Intermolecular DHBs of <b>2c</b> .....                                                                                  | 37        |
| Figure S5j Intramolecular DHBs of <b>2c</b> .....                                                                                  | 37        |
| Figure S5k Intermolecular DHBs of C <sub>4</sub> H <sub>8</sub> O· <b>3c</b> .....                                                 | 38        |
| Figure S5l Intramolecular DHBs of C <sub>4</sub> H <sub>8</sub> O· <b>3c</b> .....                                                 | 38        |
| Figure S5m Intermolecular DHBs of <b>3d</b> .....                                                                                  | 39        |
| Figure S5n Intramolecular DHBs of <b>3d</b> .....                                                                                  | 39        |
| Figure S6a The NPA value and CPs of mono-molecule <b>1a</b> , <b>1b</b> and <b>1c</b> .....                                        | 40        |
| Figure S6b The CPs of <b>1a</b> intermolecular DHB interaction.....                                                                | 40        |
| Figure S6c The BCPs of <b>1b</b> intermolecular DHB interaction.....                                                               | 41        |
| Figure S6d The BCPs of <b>1c</b> intermolecular DHB interaction.....                                                               | 41        |
| Figure S6e The NPA value and BCPs of mono-molecule <b>2a</b> and <b>2c</b> .....                                                   | 42        |
| Figure S6f The BCPs of <b>2a</b> intermolecular DHB interaction.....                                                               | 42        |
| Figure S6g The BCPs of <b>2c</b> intermolecular DHB interaction.....                                                               | 43        |
| Figure S6h The NPA value and BCPs of mono-molecule <b>3c</b> and <b>3d</b> .....                                                   | 44        |
| Figure S6i The BCPs of <b>3c</b> intermolecular DHB interaction.....                                                               | 45        |
| Figure S6j The BCPs of <b>3d</b> intermolecular DHB interaction.....                                                               | 45        |
| Table S10 The energy difference ( $\Delta E$ ) of <i>anti</i> configuration and <i>gauch</i> configuration of the diborazanes..... | 46        |
| Table S11 The melting points of the diborazanes and the isoelectronic analogs.....                                                 | 46        |
| <b>3. The optimized cartesian coordinates of all species.....</b>                                                                  | <b>47</b> |

## 1. Synthesis of diborazanes

### Synthesis of Me<sub>2</sub>NHBH<sub>2</sub>NH<sub>2</sub>BH<sub>3</sub> (**1b**)

**1b** was prepared in the same way as compound **1a**. The reaction was completed as soon as Me<sub>2</sub>NH was dropped into ADB solution and a clear solution was obtained. The clear solution was kept in a refrigerator at -10 °C, and colorless transparent block crystals were obtained. The yield/conversion (%) of **1b** are 68/100. <sup>11</sup>B NMR (*d*<sub>8</sub>-THF, 128 MHz, δ) -4.0 (t, B1H<sub>2</sub>, *J*<sub>B-H</sub> = 104 Hz), -21.9 (q, B2H<sub>3</sub>, *J*<sub>B-H</sub> = 87 Hz). <sup>11</sup>B{<sup>1</sup>H} NMR (*d*<sub>8</sub>-THF, 128 MHz, δ) -4.0 (s, B1H<sub>2</sub>), -21.9 (s, B2H<sub>3</sub>). <sup>1</sup>H NMR (*d*<sub>8</sub>-THF, 400 MHz, δ) 5.3 (*br*, H of N1H), 2.5 (*br*, 2H of N2H<sub>2</sub>), 2.3 (*d*, 6H of C1H<sub>3</sub> and C2H<sub>3</sub>, *J*<sub>H-H</sub> = 6 Hz), 1.8 (*q*, 2H of B1H<sub>2</sub>), 1.2 (*q*, 3H of B2H<sub>3</sub>, *J*<sub>B-H</sub> = 4 Hz). <sup>1</sup>H{<sup>11</sup>B} NMR (*d*<sub>8</sub>-THF, 400 MHz, δ) 5.3 (*br*, H of N1H), 2.5 (*br*, 2H of N2H<sub>2</sub>), 2.3 (*d*, 6H of C1H<sub>3</sub> and C2H<sub>3</sub>, *J*<sub>H-H</sub> = 6 Hz), 1.8 (*q*, 2H of B1H<sub>2</sub>, <sup>3</sup>*J*<sub>H-H</sub> = 4 Hz), 1.2 (*t*, 3H of B2H<sub>3</sub>, <sup>3</sup>*J*<sub>H-H</sub> = 4 Hz). <sup>13</sup>C{<sup>1</sup>H} NMR (*d*<sub>8</sub>-THF, 400 MHz, δ) 39.6 (s, CH<sub>3</sub>). Anal. Calcd for C<sub>2</sub>H<sub>14</sub>B<sub>2</sub>N<sub>2</sub> (87.77): C, 27.37; H, 16.08; N, 31.92. Found: C, 27.61; H, 16.42; N, 32.10.

### Synthesis of Me<sub>3</sub>NBH<sub>2</sub>NH<sub>2</sub>BH<sub>3</sub> (**1c**)

**1c** was prepared in the same way as compound **1a**. The reaction was completed as soon as Me<sub>3</sub>N was dropped into ADB solution and white precipitation was obtained. The yield/conversion (%) are 67/100. The white precipitation was re-dissolved by more THF, and kept in a refrigerator at -10 °C, and colorless transparent block crystals were obtained. <sup>11</sup>B NMR (*d*<sub>8</sub>-THF, 128 MHz, δ) -1.34 (t, B1H<sub>2</sub>, *J*<sub>B-H</sub> = 109.40 Hz), -20.44 (q, B2H<sub>3</sub>, *J*<sub>B-H</sub> = 88.10 Hz). <sup>11</sup>B{<sup>1</sup>H} NMR (*d*<sub>8</sub>-THF, 128 MHz, δ) -1.3 (s, B1H<sub>2</sub>), -20.4 (s, B2H<sub>3</sub>). <sup>1</sup>H NMR (*d*<sub>8</sub>-THF, 400 MHz, δ) 2.6 (*br*, 2H of N2H<sub>2</sub>), 2.5 (s, 9H of C1H<sub>3</sub>, C2H<sub>3</sub> and C3H<sub>3</sub>), 1.9 (*q*, 2H of B1H<sub>2</sub>), 1.2 (*q*, 3H of B2H<sub>3</sub>, *J*<sub>B-H</sub> = 4 Hz). <sup>1</sup>H{<sup>11</sup>B} NMR (*d*<sub>8</sub>-THF, 400 MHz, δ) 2.6 (*br*, 2H of N2H<sub>2</sub>), 2.5 (s, 9H of C1H<sub>3</sub>, C2H<sub>3</sub>

and C3H3), 1.9 (*t*, 2H of B1H<sub>2</sub>, <sup>3</sup>J<sub>H-H</sub> = 5 Hz), 1.2 (*t*, 3H of B2H<sub>3</sub>, <sup>3</sup>J<sub>H-H</sub> = 4 Hz). <sup>13</sup>C{<sup>1</sup>H} NMR (*d*<sub>8</sub>-THF, 400 MHz, δ) 49.6 (*s*, CH<sub>3</sub>). Anal. Calcd for C<sub>3</sub>H<sub>16</sub>B<sub>2</sub>N<sub>2</sub> (101.80): C, 35.39; H, 15.84; N, 27.70. Found: C, 35.57; H, 16.20; N, 27.40.

### Synthesis of EtNH<sub>2</sub>BH<sub>2</sub>NH<sub>2</sub>BH<sub>3</sub> (**2a**)

**2a** was prepared in the same way as compound **1a**. The reaction was completed as soon as EtNH<sub>2</sub> was dropped into ADB solution and a clear solution was obtained. The clear solution was kept in a refrigerator at -10 °C, and colorless transparent block crystals were obtained. While the crystal is not suitable for X-Ray analysis. The yield/conversion (%) of **2a** are 68/100. <sup>11</sup>B NMR (*d*<sub>8</sub>-THF, 128 MHz, δ) -8.3 (*t*, B1H<sub>2</sub>, J<sub>B-H</sub> = 104 Hz), -21.8 (*q*, B2H<sub>3</sub>, J<sub>B-H</sub> = 94 Hz). <sup>11</sup>B{<sup>1</sup>H} NMR (*d*<sub>8</sub>-THF, 128 MHz, δ) -8.3 (*s*, B1H<sub>2</sub>), -21.8 (*s*, B2H<sub>3</sub>). <sup>1</sup>H NMR (*d*<sub>8</sub>-THF, 400 MHz, δ) 4.9 (*br*, 2H of N1H<sub>2</sub>), 2.6 (*m*, 2H of C1H<sub>2</sub>), 2.4 (*br*, 2H of N2H<sub>2</sub>), 1.9 (*q*, 2H of B1H<sub>2</sub>), 1.2 (*q*, 3H of B2H<sub>3</sub>), 1.1 (*t*, 3H of C2H<sub>3</sub>, J<sub>H-H</sub> = 7 Hz). <sup>1</sup>H{<sup>11</sup>B} NMR (*d*<sub>8</sub>-THF, 400 MHz, δ) 4.9 (*br*, 2H of N1H<sub>2</sub>), 2.6 (*m*, 2H of C1H<sub>2</sub>), 2.4 (*br*, 2H of N2H<sub>2</sub>), 1.90 (*quint*, 2H of B1H<sub>2</sub>, <sup>3</sup>J<sub>H-H</sub> = 4 Hz), 1.2 (*t*, 3H of B2H<sub>3</sub>, <sup>3</sup>J<sub>H-H</sub> = 4 Hz), 1.1 (*t*, 3H of C2H<sub>3</sub>, J<sub>H-H</sub> = 7 Hz). <sup>13</sup>C{<sup>1</sup>H} NMR (*d*<sub>8</sub>-THF, 400 MHz, δ) 39.0 (*s*, C1H<sub>2</sub>), 13.3 (*s*, C2H<sub>3</sub>). Anal. Calcd for C<sub>2</sub>H<sub>14</sub>B<sub>2</sub>N<sub>2</sub> (87.77): C, 27.37; H, 16.08; N, 31.92. Found: C, 27.64; H, 16.45; N, 32.15.

We utilized 18-crown-6 ether to bind **2a** by weak hydrogen bonds. A 10 mL THF solution of **2a** (0.088g, 1 mmol) was prepared and 0.185 g (0.7 mmol) of 18-crown-6 was added to the solution in a dry box. The mixture was stirred for 5 min and filtered. The clear solution was kept in a refrigerator at -10 °C, and colorless transparent block crystals (C<sub>12</sub>H<sub>24</sub>O<sub>6</sub>·**2a**) were obtained. <sup>11</sup>B NMR (*d*<sub>8</sub>-THF, 128 MHz, δ) -8.3 (*t*, B1H<sub>2</sub>, J<sub>B-H</sub> = 104 Hz), -21.0 (*q*, B2H<sub>3</sub>, J<sub>B-H</sub> = 94 Hz). <sup>11</sup>B{<sup>1</sup>H} NMR (*d*<sub>8</sub>-THF, 128 MHz, δ) -8.3 (*s*, B1H<sub>2</sub>), -21.8 (*s*, B2H<sub>3</sub>). <sup>1</sup>H NMR (*d*<sub>8</sub>-THF, 400 MHz, δ) 4.9 (*br*, 2H of N1H<sub>2</sub>),

3.5 (*s*, 24H of CH<sub>2</sub>, 18-C-6), 2.6 (*m*, 2H of C1H<sub>2</sub>), 2.4 (*br*, 2H of N2H<sub>2</sub>), 1.9 (*q*, 2H of B1H<sub>2</sub>), 1.2 (*q*, 3H of B2H<sub>3</sub>), 1.1 (*t*, 3H of C2H<sub>3</sub>,  $J_{\text{H-H}} = 7$  Hz). <sup>1</sup>H{<sup>11</sup>B} NMR (*d*<sub>8</sub>-THF, 400 MHz,  $\delta$ ) 4.9 (*br*, 2H of N1H<sub>2</sub>), 3.5 (*s*, 24H of CH<sub>2</sub>, 18-C-6), 2.6 (*m*, 2H of C1H<sub>2</sub>), 2.4 (*br*, 2H of N2H<sub>2</sub>), 1.9 (*quint*, 2H of B1H<sub>2</sub>,  $^3J_{\text{H-H}} = 4$  Hz), 1.2 (*t*, 3H of B2H<sub>3</sub>,  $^3J_{\text{H-H}} = 4$  Hz), 1.1 (*t*, 3H of C2H<sub>3</sub>,  $J_{\text{H-H}} = 7$  Hz). <sup>13</sup>C{<sup>1</sup>H} NMR (*d*<sub>8</sub>-THF, 400 MHz,  $\delta$ ) 70.6 (*s*, CH<sub>2</sub> of 18-Crown-6), 39.0 (*s*, C1H<sub>2</sub>), 13.3 (*s*, C2H<sub>3</sub>).

### Synthesis of Et<sub>2</sub>NHBH<sub>2</sub>NH<sub>2</sub>BH<sub>3</sub> (2b)

**2b** was prepared in the same way as compound **1a**. The reaction was completed as soon as Et<sub>2</sub>NH was dropped into ADB solution and a clear solution was obtained. Several crystal growing techniques had been tried to prepare **2b** crystal, no crystal had been obtained yet. The product was characterized by its solution of THF. <sup>11</sup>B NMR (*d*<sub>8</sub>-THF, 128 MHz,  $\delta$ ) -7.1 (*t*, B1H<sub>2</sub>,  $J_{\text{B-H}} = 107$  Hz), -21.3 (*q*, B2H<sub>3</sub>,  $J_{\text{B-H}} = 91$  Hz).

### Synthesis of Et<sub>3</sub>NBH<sub>2</sub>NH<sub>2</sub>BH<sub>3</sub> (2c)

**2c** was prepared in the same way as compound **1a**. The reaction was completed as soon as Et<sub>3</sub>N was dropped into ADB solution and a clear solution was obtained. The clear solution was kept in a refrigerator at -10 °C, and colorless transparent block crystals were obtained. The yield/conversion (%) of **2c**, are 67/100. <sup>11</sup>B NMR (*d*<sub>8</sub>-THF, 128 MHz,  $\delta$ ) -6.0 (*t*, B1H<sub>2</sub>,  $J_{\text{B-H}} = 102$  Hz), -20.2 (*q*, B2H<sub>3</sub>,  $J_{\text{B-H}} = 85$  Hz), -27.4 (*br t*, NH<sub>2</sub>B<sub>2</sub>H<sub>5</sub>). <sup>11</sup>B{<sup>1</sup>H} NMR (*d*<sub>8</sub>-THF, 128 MHz,  $\delta$ ) -6.0 (*s*, B1H<sub>2</sub>), -20.2 (*s*, B2H<sub>3</sub>), -27.4 (*s*, NH<sub>2</sub>B<sub>2</sub>H<sub>5</sub>). <sup>1</sup>H NMR (*d*<sub>8</sub>-THF, 400 MHz,  $\delta$ ) 3.9 (*br t*, 2H of NH<sub>2</sub>,  $J_{\text{N-H}} = 53$  Hz), 2.8 (*q*, 6H of CH<sub>2</sub>,  $J_{\text{H-H}} = 7$  Hz), 2.9 (*q*, 6H of CH<sub>2</sub>,  $J_{\text{H-H}} = 7$  Hz), 2.4 (*br*, 2H of NH<sub>2</sub>), 2.2 (*t*, 2H,  $J_{\text{H-H}} = 7$  Hz), 1.8 (*q*, 2H of BH<sub>2</sub>), 1.3 (*q*, 3H of BH<sub>3</sub>), 1.0 (*t*, 9H of CH<sub>3</sub>,  $J_{\text{H-H}} = 7$  Hz), 0.9 (*t*, 9H of CH<sub>3</sub>,  $J_{\text{H-H}} = 7$  Hz). <sup>1</sup>H{<sup>11</sup>B} NMR (*d*<sub>8</sub>-THF, 400 MHz,  $\delta$ ) 3.9 (*br t*, 2H of NH<sub>2</sub>,  $J_{\text{N-H}} = 53$  Hz), 2.8 (*q*, 6H of CH<sub>2</sub>,  $J_{\text{H-H}} = 7$  Hz), 2.8 (*q*, 6H of CH<sub>2</sub>,  $J_{\text{H-H}} = 7$  Hz), 2.4 (*br*, 2H of NH<sub>2</sub>), 2.2 (*t*, 2H,  $J_{\text{H-H}} = 7$  Hz), 1.8 (*t*, 2H of BH<sub>2</sub>,

$^3J_{\text{H-H}} = 5 \text{ Hz}$ ), 1.3 (*t*, 3H of  $\text{BH}_3$ ,  $^3J_{\text{H-H}} = 4 \text{ Hz}$ ), 1.0 (*t*, 9H of  $\text{CH}_3$ ,  $J_{\text{H-H}} = 7 \text{ Hz}$ ), 0.9 (*t*, 9H of  $\text{CH}_3$ ,  $J_{\text{H-H}} = 7 \text{ Hz}$ ).  $^{13}\text{C}\{^1\text{H}\}$  NMR ( $d_8$ -THF, 400 MHz,  $\delta$ ) 48.4 (*s*,  $\text{C1H}_2$ ), 46.4 (*s*,  $\text{CH}_2$  of  $\text{N}(\underline{\text{CH}_2\text{CH}_3})_3$ ), 11.7 (*s*,  $\text{CH}_3$  of  $\text{N}(\underline{\text{CH}_2\text{CH}_3})_3$ ), 7.3(*s*,  $\text{C2H}_3$ ). Anal. Calcd for  $\text{C}_6\text{H}_{22}\text{B}_2\text{N}_2$  (143.88): C, 50.08; H, 15.52; N, 19.48. Found: C, 50.25; H, 15.55; N, 19.34.

### Synthesis of ${}^n\text{PrNH}_2\text{BH}_2\text{NH}_2\text{BH}_3$ (**3a**)

**3a** was prepared in the same way as compound **1a**. The reaction was completed as soon as  ${}^n\text{PrNH}_2$  was dropped into ADB solution and a clear solution was obtained. The clear solution was kept in a refrigerator at  $-10 \text{ }^\circ\text{C}$ , and colorless transparent block crystals were obtained. The yield/conversion (%) of **3a** are 68/100. Several crystal growing techniques had been tried to prepare **2b** crystal, no crystal had been obtained yet.  $^{11}\text{B}$  NMR ( $d_8$ -THF, 128 MHz,  $\delta$ ) -8.61 (*t*,  $\text{B1H}_2$ ,  $J_{\text{B-H}} = 106.50 \text{ Hz}$ ), -22.34 (*q*,  $\text{B2H}_3$ ,  $J_{\text{B-H}} = 95.20 \text{ Hz}$ ).  $^{11}\text{B}\{^1\text{H}\}$  NMR ( $d_8$ -THF, 128 MHz,  $\delta$ ) -8.61 (*s*,  $\text{B1H}_2$ ), -22.34 (*s*,  $\text{B2H}_3$ ).  $^1\text{H}$  NMR ( $d_8$ -THF, 400 MHz,  $\delta$ ) 4.88 (*br*, 2H of  $\text{N1H}_2$ ), 2.51 (*m*, 2H of  $\text{C1H}_2$ ), 2.38 (*br*, 2H of  $\text{N2H}_2$ ), 1.90 (*q*, 2H of  $\text{B1H}_2$ ), 1.61 (*m*, 2H of  $\text{C2H}_2$ ), 1.20 (*q*, 3H of  $\text{B2H}_3$ ), 0.85 (*t*, 3H of  $\text{C3H}_3$ ,  $J_{\text{H-H}} = 7.50 \text{ Hz}$ ).  $^1\text{H}\{^{11}\text{B}\}$  NMR ( $d_8$ -THF, 400 MHz,  $\delta$ ) 4.88 (*br*, 2H of  $\text{N1H}_2$ ), 2.51 (*m*, 2H of  $\text{C1H}_2$ ), 2.38 (*br*, 2H of  $\text{N2H}_2$ ), 1.90 (*quint*, 2H of  $\text{B1H}_2$ ,  $^3J_{\text{H-H}} = 4.00 \text{ Hz}$ ), 1.61 (*m*, 2H of  $\text{C2H}_2$ ), 1.20 (*t*, 3H of  $\text{B2H}_3$ ,  $^3J_{\text{H-H}} = 4.50 \text{ Hz}$ ), 0.85 (*t*, 3H of  $\text{C3H}_3$ ,  $J_{\text{H-H}} = 7.50 \text{ Hz}$ ).  $^{13}\text{C}\{^1\text{H}\}$  NMR ( $d_8$ -THF, 400 MHz,  $\delta$ ) 44.04 (*s*,  $\text{C1H}_2$ ), 20.06 (*s*,  $\text{C2H}_2$ ), 8.64 (*s*,  $\text{C3H}_3$ ). Anal. Calcd for  $\text{C}_3\text{H}_{16}\text{B}_2\text{N}_2$  (101.80): C, 35.39; H, 15.84; N, 27.53. Found: C, 35.58; H, 16.18; N, 27.18.

### Synthesis of ${}^n\text{Pr}_2\text{NHBH}_2\text{NH}_2\text{BH}_3$ (**3b**)

**3b** was prepared in the same way as compound **1a**. The reaction was completed as soon as  ${}^n\text{Pr}_2\text{NH}$  was dropped into ADB solution and a clear solution was obtained. The solvent THF was evaporated under a dynamic vacuum to leave a wax. Several

crystal growing techniques had been tried to prepare **3b** crystal, no crystal had been obtained yet. The product was characterized by its solution of THF.  $^{11}\text{B}$  NMR ( $d_8$ -THF, 128 MHz,  $\delta$ ) -6.65 (*t*, B1H<sub>2</sub>,  $J_{\text{B-H}} = 94.65$  Hz), -21.58 (*q*, B2H<sub>3</sub>,  $J_{\text{B-H}} = 90.90$  Hz).

### Synthesis of $^n\text{Pr}_3\text{NBH}_2\text{NH}_2\text{BH}_3$ (**3c**)

**3c** was prepared in the same way as compound **1a**. The reaction was completed as soon as  $^n\text{Pr}_3\text{N}$  was dropped into ADB solution and a clear solution was obtained. The clear solution was kept in a refrigerator at -10 °C, and colorless transparent block crystals ( $\text{C}_4\text{H}_8\text{O}\cdot\mathbf{3c}$ ) were obtained. The yield/conversion (%) of **3c**, are 67/93.  $^{11}\text{B}$  NMR ( $d_8$ -THF, 128 MHz,  $\delta$ ) -4.49 (*t*, B1H<sub>2</sub>,  $J_{\text{B-H}} = 99.66$  Hz), -19.68 (*q*, B2H<sub>3</sub>,  $J_{\text{B-H}} = 88.2$  Hz), -27.43 (*br, t*, NH<sub>2</sub>B<sub>2</sub>H<sub>5</sub>).  $^{11}\text{B}\{^1\text{H}\}$  NMR ( $d_8$ -THF, 128 MHz,  $\delta$ ) -4.49 (*s*, B1H<sub>2</sub>), -19.68 (*s*, B2H<sub>3</sub>), -27.43 (*s*, NH<sub>2</sub>B<sub>2</sub>H<sub>5</sub>).  $^1\text{H}$  NMR ( $d_8$ -THF, 400 MHz,  $\delta$ ) 3.90 (*br t*, 2H of NH<sub>2</sub>, NH<sub>2</sub>B<sub>2</sub>H<sub>5</sub>,  $J_{\text{N-H}} = 52.91$  Hz), 3.51 (*m*, 4 $\alpha$ -H of THF), 2.65 (*m*, 6H of C1H<sub>2</sub>), 2.40 (*br*, 2H of N2H<sub>2</sub>), 2.21 (*t*, 6H of C1H<sub>2</sub>,  $J_{\text{H-H}} = 7.01$  Hz), 1.86 (*q*, 2H of B1H<sub>2</sub>), 1.67 (*m*, 4 $\beta$ -H of THF), 1.64 (*m*, 6H of C2H<sub>2</sub>), 1.31 (*sext*, 6H of C2H<sub>2</sub>,  $J_{\text{H-H}} = 7.88$  Hz), 1.28 (*q*, 3H of B2H<sub>3</sub>), 0.77 (*m*, 18H of C3H<sub>3</sub>).  $^1\text{H}\{^{11}\text{B}\}$  NMR ( $d_8$ -THF, 400 MHz,  $\delta$ ) 3.90 (*br t*, 2H of NH<sub>2</sub>, NH<sub>2</sub>B<sub>2</sub>H<sub>5</sub>,  $J_{\text{N-H}} = 52.91$  Hz), 3.51 (*m*, 4 $\alpha$ -H of THF), 2.65 (*m*, 6H of C1H<sub>2</sub>), 2.40 (*br*, 2H of N2H<sub>2</sub>), 2.21 (*t*, 6H of C1H<sub>2</sub>,  $J_{\text{H-H}} = 7.01$  Hz), 1.86 (*t*, 2H of B1H<sub>2</sub>,  $^3J_{\text{H-H}} = 4.56$  Hz), 1.67 (*m*, 4 $\beta$ -H of THF), 1.64 (*m*, 6H of C2H<sub>2</sub>), 1.31 (*sext*, 6H of C2H<sub>2</sub>,  $J_{\text{H-H}} = 7.88$  Hz), 1.28 (*t*, 3H of B2H<sub>3</sub>), 0.77 (*m*, 18H of C3H<sub>3</sub>).  $^{13}\text{C}\{^1\text{H}\}$  NMR ( $d_8$ -THF, 400 MHz,  $\delta$ ) 67.23 (*s*, CH<sub>2</sub> of THF), 57.11 (*s*, CH<sub>2</sub> of N(CH<sub>2</sub>CH<sub>2</sub>CH<sub>3</sub>)<sub>3</sub>), 56.25 (*s*, C1H<sub>2</sub>), 25.13 (*s*, CH<sub>2</sub> of THF), 20.62 (*s*, C2H<sub>2</sub>), 15.53 (*s*, CH<sub>2</sub> of N(CH<sub>2</sub>CH<sub>2</sub>CH<sub>3</sub>)<sub>3</sub>), 11.22 (*s*, C3H<sub>3</sub>), 10.71 (*s*, CH<sub>3</sub> of N(CH<sub>2</sub>CH<sub>2</sub>CH<sub>3</sub>)<sub>3</sub>). Anal. Calcd for C<sub>9</sub>H<sub>28</sub>B<sub>2</sub>N<sub>2</sub> (185.95): C, 58.37; H, 15.56; N, 15.27. Found: C, 58.37; H, 15.56; N, 15.27.



### Synthesis of $i\text{PrNH}_2\text{BH}_2\text{NH}_2\text{BH}_3$ (**3d**)

**3d** was prepared in the same way as compound **1a**. The reaction was completed as soon as  $i\text{PrNH}_2$  was dropped into ADB solution and a clear solution was obtained. The clear solution was kept in a refrigerator at  $-10\text{ }^\circ\text{C}$ , and colorless transparent block crystals were obtained. The yield/conversion (%) of **3d** are 67/100.  $^{11}\text{B}$  NMR ( $d_8$ -THF, 128 MHz,  $\delta$ ) -10.27 (*t*, B1H<sub>2</sub>,  $J_{\text{B-H}} = 104.3$  Hz), -22.85 (*q*, B2H<sub>3</sub>,  $J_{\text{B-H}} = 92.97$  Hz).  $^{11}\text{B}\{^1\text{H}\}$  NMR ( $d_8$ -THF, 128 MHz,  $\delta$ ) -10.27 (*s*, B1H<sub>2</sub>), -22.85 (*s*, B2H<sub>3</sub>).  $^1\text{H}$  NMR ( $d_8$ -THF, 400 MHz,  $\delta$ ) 4.86 (*br*, 2H of N1H<sub>2</sub>), 2.92 (*m*, H of C1H), 2.34 (*br*, 2H of N2H<sub>2</sub>), 1.94 (*q*, 2H of B1H<sub>2</sub>), 1.20 (*q*, 3H of B2H<sub>3</sub>), 1.11 (*t*, 6H of C2H<sub>3</sub> and C3H<sub>3</sub>,  $J_{\text{H-H}} = 6.5$  Hz).  $^1\text{H}\{^{11}\text{B}\}$  NMR ( $d_8$ -THF, 400 MHz,  $\delta$ ) 4.86 (*br*, 2H of NH<sub>2</sub>), 2.92 (*m*, H of C1H), 2.34 (*br*, 2H of N2H<sub>2</sub>), 1.94 (*quint*, 2H of B1H<sub>2</sub>,  $^3J_{\text{H-H}} = 4.29$  Hz), 1.20 (*t*, 3H of B2H<sub>3</sub>,  $^3J_{\text{H-H}} = 4.5$  Hz), 1.11 (*t*, 6H of C2H<sub>3</sub> and C3H<sub>3</sub>,  $J_{\text{H-H}} = 6.5$  Hz).  $^{13}\text{C}\{^1\text{H}\}$  NMR ( $d_8$ -THF, 400 MHz,  $\delta$ ) 46.17 (*s*, C1H<sub>2</sub>), 20.74 (*s*, C2H<sub>3</sub> and C3H<sub>3</sub>). Anal. Calcd for C<sub>3</sub>H<sub>16</sub>B<sub>2</sub>N<sub>2</sub> (101.80): C, 35.39; H, 15.84; N, 27.53. Found: C, 35.54; H, 16.10; N, 27.18.

### Synthesis of $i\text{Pr}_2\text{NHBH}_2\text{NH}_2\text{BH}_3$ (**3e**)

**3e** was prepared in the same way as compound **1a**. The reaction was completed as soon as  $i\text{Pr}_2\text{NH}$  was dropped into ADB solution and a clear solution was obtained. The THF solution of **3e** was subjected to fractional distillation to remove the excess solvent to further purify the products, but only a wax was obtained, and no crystal had been obtained yet. The product was characterized by its solution of THF.  $^{11}\text{B}$  NMR ( $d_8$ -THF, 128 MHz,  $\delta$ ) -9.80 (*t*, B1H<sub>2</sub>,  $J_{\text{B-H}} = 110.80$  Hz), -22.27 (*q*, B2H<sub>3</sub>,  $J_{\text{B-H}} = 92.70$  Hz).

### Synthesis of $i\text{Pr}_2\text{MeNBH}_2\text{NH}_2\text{BH}_3$ (**3f**)

**3f** was tried to be prepared in the same way as compound **1a**. A very slow reaction

occurred when  $i\text{Pr}_2\text{Me}$  was dropped into the ADB solution of THF at room temperature. The conversion was only 0.60% after 24 h. The product was characterized by its solution of THF.  $^{11}\text{B}$  NMR ( $d_8$ -THF, 128 MHz,  $\delta$ ) -11.50 ( $t$ ,  $\text{B1H}_2$ ,  $J_{\text{B-H}} = 88.22$  Hz), -22.20 ( $q$ ,  $\text{B2H}_3$ ,  $J_{\text{B-H}} = 97.51$  Hz).

### Synthesis of $i\text{Pr}_2\text{EtNBH}_2\text{NH}_2\text{BH}_3$ (**3g**)

**3g** was tried to be prepared in the same way as compound **1a**. No reaction occurred when  $i\text{Pr}_2\text{Et}$  was dropped into the ADB solution at room temperature.

## 2. Supporting results

**Table S1** The reactions of ADB with alkylamines.

| Entry | alkylamines                      | Reaction speed* | Product                                                                                       |                | Yield <sup>a</sup> /conversion <sup>b</sup> (%) |
|-------|----------------------------------|-----------------|-----------------------------------------------------------------------------------------------|----------------|-------------------------------------------------|
| 1     | MeNH <sub>2</sub>                | fast            | MeNH <sub>2</sub> BH <sub>2</sub> NH <sub>2</sub> BH <sub>3</sub> ( <b>1a</b> )               | white powder   | 68/100                                          |
| 2     | Me <sub>2</sub> NH               | fast            | Me <sub>2</sub> NHBH <sub>2</sub> NH <sub>2</sub> BH <sub>3</sub> ( <b>1b</b> )               | white powder   | 68/100                                          |
| 3     | Me <sub>3</sub> N                | fast            | Me <sub>3</sub> NBH <sub>2</sub> NH <sub>2</sub> BH <sub>3</sub> ( <b>1c</b> )                | white powder   | 67/100                                          |
| 4     | EtNH <sub>2</sub>                | fast            | EtNH <sub>2</sub> BH <sub>2</sub> NH <sub>2</sub> BH <sub>3</sub> ( <b>2a</b> )               | white powder   | 68/100                                          |
| 5     | Et <sub>2</sub> NH               | fast            | Et <sub>2</sub> NHBH <sub>2</sub> NH <sub>2</sub> BH <sub>3</sub> ( <b>2b</b> )               | wax            | - <sup>c</sup> /100                             |
| 6     | Et <sub>3</sub> N                | fast            | Et <sub>3</sub> NBH <sub>2</sub> NH <sub>2</sub> BH <sub>3</sub> ( <b>2c</b> )                | white powder   | 67/100                                          |
| 7     | <sup>n</sup> PrNH <sub>2</sub>   | fast            | <sup>n</sup> PrNH <sub>2</sub> BH <sub>2</sub> NH <sub>2</sub> BH <sub>3</sub> ( <b>3a</b> )  | white powder   | 68/100                                          |
| 8     | <sup>n</sup> Pr <sub>2</sub> NH  | fast            | <sup>n</sup> Pr <sub>2</sub> NHBH <sub>2</sub> NH <sub>2</sub> BH <sub>3</sub> ( <b>3b</b> )  | wax            | -/100                                           |
| 9     | <sup>n</sup> Pr <sub>3</sub> N   | fast            | <sup>n</sup> Pr <sub>3</sub> NBH <sub>2</sub> NH <sub>2</sub> BH <sub>3</sub> ( <b>3c</b> )   | white powder   | 67/93                                           |
| 10    | <sup>i</sup> PrNH <sub>2</sub>   | fast            | <sup>i</sup> PrNH <sub>2</sub> BH <sub>2</sub> NH <sub>2</sub> BH <sub>3</sub> ( <b>3d</b> )  | white powder   | 67/100                                          |
| 11    | <sup>i</sup> Pr <sub>2</sub> NH  | fast            | <sup>i</sup> Pr <sub>2</sub> NHBH <sub>2</sub> NH <sub>2</sub> BH <sub>3</sub> ( <b>3e</b> )  | wax            | - <sup>c</sup> /100                             |
| 12    | <sup>i</sup> Pr <sub>2</sub> MeN | slow            | <sup>i</sup> Pr <sub>2</sub> MeNBH <sub>2</sub> NH <sub>2</sub> BH <sub>3</sub> ( <b>3f</b> ) | - <sup>c</sup> | - <sup>c</sup> /0.6                             |
| 13    | <sup>i</sup> Pr <sub>2</sub> EtN | NR              | -                                                                                             | -              | -                                               |

\*Fast: the reaction was completed as soon as alkylamine was added to ADB solution.

\*Slow: the reaction of <sup>i</sup>Pr<sub>2</sub>MeN with ADB is very slow, only 0.6 % of <sup>i</sup>Pr<sub>2</sub>MeNBH<sub>2</sub>NH<sub>2</sub>BH<sub>3</sub> was formed after 24 h.

\*NR: No Reaction.

a: isolated yield;

b: calculated by the resonance intensities of boron signals in the <sup>11</sup>B NMR spectra of the reaction mixture;

c: The product could not be isolated.

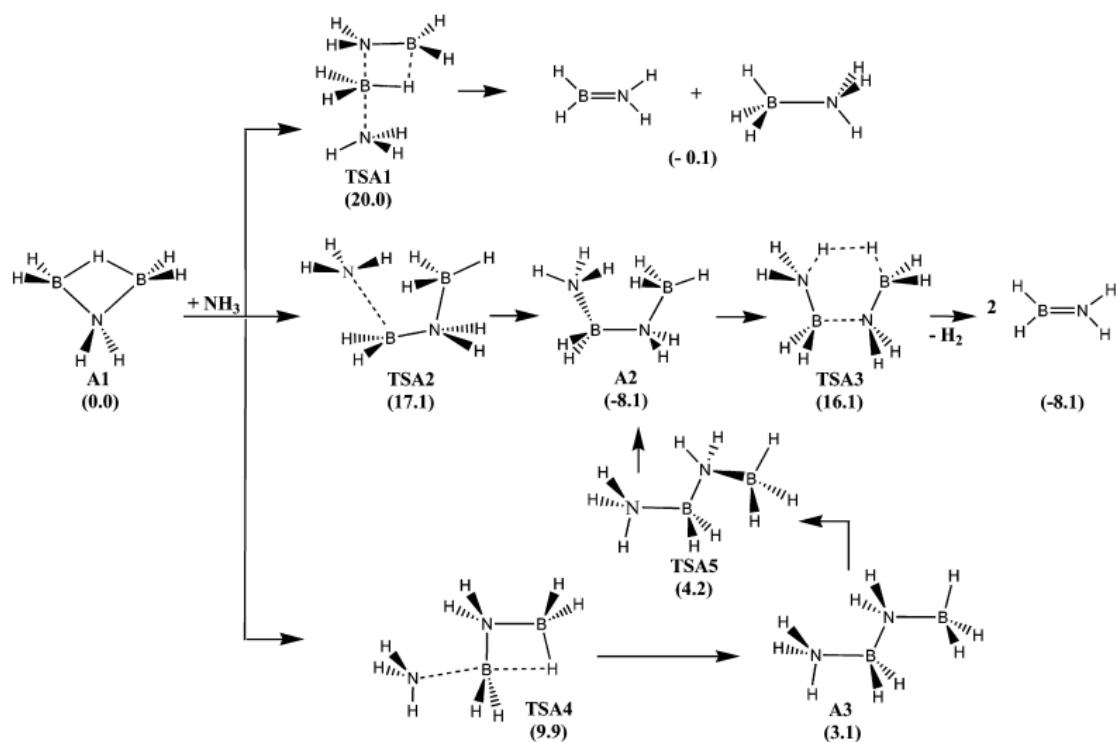

**Figure S1** Predicted pathways of the reaction between ADB and NH<sub>3</sub> based on density functional theory (DFT) calculations (Inorg. Chem. 2007, 46, 7633–7645). Enthalpies (kcal/mol) are relative to ADB + NH<sub>3</sub> at 298.15 K. Pathway 1: A1 → TSA4 → A3; Pathway 2: A1 → TSA2 → A2. The reaction depicted in our manuscript (reaction 1) ends the formation of the linear diborazanes without further reactions at room temperature.

**Table S2a** The relative energies  $\{\Delta(E+ZPE)/(\text{kcal}\cdot\text{mol}^{-1})\}$ , enthalpies  $\{\Delta H (298 \text{ K})/(\text{kcal}\cdot\text{mol}^{-1})\}$ , free energy changes  $\{\Delta G (298 \text{ K})/(\text{kcal}\cdot\text{mol}^{-1})\}$  and entropy  $\{S (298 \text{ K})(\text{cal}\cdot\text{mol}^{-1})\}$  for the reactions of ADB with alkylamines.

| Species                                    | $\Delta(E + ZPE)$ | $\Delta H$ | $\Delta G$ | S     |
|--------------------------------------------|-------------------|------------|------------|-------|
| 1) ADB + MeNH <sub>2</sub>                 | 0.0               | 0.0        | 0.0        | 119.9 |
| TS1                                        | 4.7               | 4.5        | 14.8       | 85.6  |
| P1                                         | -18.4             | -18.7      | -8.1       | 84.3  |
| 2) ADB + Me <sub>2</sub> NH                | 0.0               | 0.0        | 0.0        | 127.5 |
| TS2                                        | 2.9               | 2.8        | 13.5       | 91.6  |
| P2                                         | -20.5             | -20.8      | -9.3       | 89.1  |
| 3) ADB + NMe <sub>3</sub>                  | 0.0               | 0.0        | 0.0        | 133.4 |
| TS3                                        | 1.9               | 1.8        | 13.2       | 95.0  |
| P3                                         | -20.4             | -20.6      | -9.0       | 94.7  |
| 4) ADB + EtNH <sub>2</sub>                 | 0.0               | 0.0        | 0.0        | 127.3 |
| TS4                                        | 4.5               | 4.4        | 14.7       | 92.8  |
| P4                                         | -18.8             | -18.9      | -8.1       | 91.2  |
| 5) ADB + Et <sub>2</sub> NH                | 0.0               | 0.0        | 0.0        | 142.2 |
| TS5                                        | 3.6               | 3.5        | 15.1       | 103.3 |
| P5                                         | -17.3             | -17.9      | -4.9       | 98.8  |
| 6) ADB + Et <sub>3</sub> N                 | 0.0               | 0.0        | 0.0        | 155.2 |
| TS6                                        | 1.6               | 1.2        | 14.3       | 111.3 |
| P6                                         | -18.1             | -18.9      | -4.7       | 107.7 |
| 7) ADB + PrNH <sub>2</sub>                 | 0.0               | 0.0        | 0.0        | 135.2 |
| TS7                                        | 5.0               | 4.9        | 15.5       | 99.7  |
| P7                                         | -18.3             | -18.4      | -7.7       | 99.3  |
| 8) ADB + Pr <sub>2</sub> NH                | 0.0               | 0.0        | 0.0        | 157.8 |
| TS8                                        | 3.4               | 3.3        | 14.6       | 119.7 |
| P8                                         | -17.0             | -17.5      | -4.7       | 115.1 |
| 9) ADB + Pr <sub>3</sub> N                 | 0.0               | 0.0        | 0.0        | 177.9 |
| TS9                                        | 2.5               | 2.3        | 15.0       | 135.2 |
| P9                                         | -17.1             | -17.5      | -3.8       | 132.1 |
| 10) ADB + <sup>i</sup> PrNH <sub>2</sub>   | 0.0               | 0.0        | 0.0        | 133.9 |
| TS10                                       | 5.2               | 5.1        | 16.0       | 97.5  |
| P10                                        | -17.9             | -18.0      | -6.9       | 96.8  |
| 11) ADB + <sup>i</sup> Pr <sub>2</sub> NH  | 0.0               | 0.0        | 0.0        | 153.8 |
| TS11                                       | 1.9               | 1.8        | 13.7       | 114.1 |
| P11                                        | -17.6             | -18.0      | -5.3       | 111.2 |
| 12) ADB + <sup>i</sup> Pr <sub>2</sub> MeN | 0.0               | 0.0        | 0.0        | 159.1 |
| TS12                                       | 4.4               | 4.3        | 16.3       | 119.1 |
| P12                                        | -13.9             | -14.5      | -0.7       | 112.7 |
| 13) ADB + <sup>i</sup> Pr <sub>2</sub> EtN | 0.0               | 0.0        | 0.0        | 164.2 |
| TS13                                       | 9.4               | 9.3        | 21.5       | 123.2 |
| P13                                        | -8.4              | -9.2       | 5.1        | 116.0 |

**Table S2b** The calculated rate constants ( $\text{ml}\cdot\text{mol}^{-1}\cdot\text{s}^{-1}$ ) of the reactions of ADB with alkylamines.

| <i>T/K</i>             | 240      | 250      | 278      | 288      | 298      | 308      | 325      | 375      |
|------------------------|----------|----------|----------|----------|----------|----------|----------|----------|
| <i>k</i> <sub>1</sub>  | 5.97E-19 | 9.18E-19 | 2.66E-18 | 3.73E-18 | 5.13E-18 | 6.94E-18 | 1.12E-17 | 3.71E-17 |
| <i>k</i> <sub>2</sub>  | 1.12E-17 | 1.49E-17 | 3.00E-17 | 3.76E-17 | 4.67E-17 | 5.72E-17 | 7.93E-17 | 1.82E-16 |
| <i>k</i> <sub>3</sub>  | 2.45E-17 | 2.99E-17 | 4.95E-17 | 5.84E-17 | 6.83E-17 | 7.94E-17 | 1.01E-16 | 1.90E-16 |
| <i>k</i> <sub>4</sub>  | 6.82E-19 | 1.04E-18 | 2.94E-18 | 4.10E-18 | 5.60E-18 | 7.53E-18 | 1.20E-17 | 3.90E-17 |
| <i>k</i> <sub>5</sub>  | 5.76E-19 | 8.08E-19 | 1.88E-18 | 2.47E-18 | 3.19E-18 | 4.06E-18 | 5.97E-18 | 1.58E-17 |
| <i>k</i> <sub>6</sub>  | 5.24E-18 | 6.10E-18 | 8.99E-18 | 1.02E-17 | 1.16E-17 | 1.30E-17 | 1.58E-17 | 2.61E-17 |
| <i>k</i> <sub>7</sub>  | 1.47E-19 | 2.34E-19 | 7.35E-19 | 1.06E-18 | 1.49E-18 | 2.06E-18 | 3.44E-18 | 1.24E-17 |
| <i>k</i> <sub>8</sub>  | 2.63E-18 | 3.59E-18 | 7.83E-18 | 1.01E-17 | 1.28E-17 | 1.60E-17 | 2.29E-17 | 5.70E-17 |
| <i>k</i> <sub>9</sub>  | 9.59E-19 | 1.22E-18 | 2.25E-18 | 2.74E-18 | 3.31E-18 | 3.96E-18 | 5.27E-18 | 1.10E-17 |
| <i>k</i> <sub>10</sub> | 2.07E-19 | 3.24E-19 | 9.88E-19 | 1.41E-18 | 1.97E-18 | 2.70E-18 | 4.46E-18 | 1.57E-17 |
| <i>k</i> <sub>11</sub> | 1.16E-17 | 1.42E-17 | 2.37E-17 | 2.81E-17 | 3.29E-17 | 3.84E-17 | 4.91E-17 | 9.28E-17 |
| <i>k</i> <sub>12</sub> | 5.18E-20 | 7.81E-20 | 2.17E-19 | 3.00E-19 | 4.09E-19 | 5.47E-19 | 8.70E-19 | 2.79E-18 |
| <i>k</i> <sub>13</sub> | 9.26E-25 | 2.13E-24 | 1.64E-23 | 3.10E-23 | 5.66E-23 | 9.96E-23 | 2.42E-22 | 2.17E-21 |

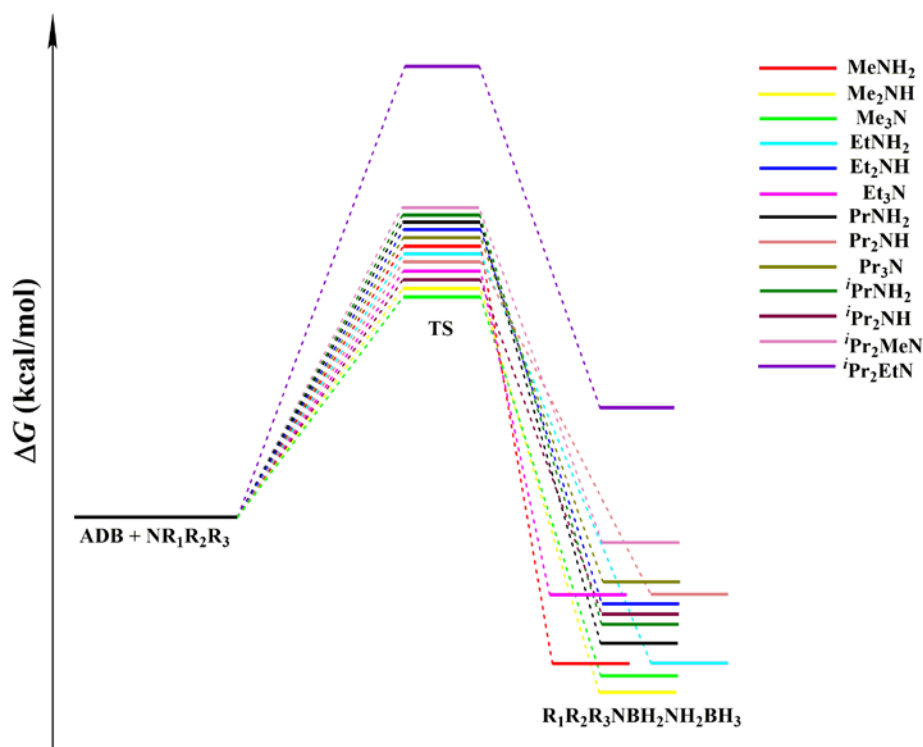

**Figure S2** Energy profile of the reaction of ADB with alkylamines.

**Table S3** The nomenclature of the diborazanes.

| Diborazanes                                                                                   | Nomenclature                                                  |
|-----------------------------------------------------------------------------------------------|---------------------------------------------------------------|
| MeNH <sub>2</sub> BH <sub>2</sub> NH <sub>2</sub> BH <sub>3</sub> ( <b>1a</b> )               | 1-N-methyl-1,3-diaza-2,4-diborabutane analogue                |
| Me <sub>2</sub> NHBH <sub>2</sub> NH <sub>2</sub> BH <sub>3</sub> ( <b>1b</b> )               | 1-N,N-dimethyl-1,3-diaza-2,4-diborabutane analogue            |
| Me <sub>3</sub> NBH <sub>2</sub> NH <sub>2</sub> BH <sub>3</sub> ( <b>1c</b> )                | 1-N,N,N-trimethyl-1,3-diaza-2,4-diborabutane analogue         |
| EtNH <sub>2</sub> BH <sub>2</sub> NH <sub>2</sub> BH <sub>3</sub> ( <b>2a</b> )               | 1-N-ethyl-1,3-diaza-2,4-diborabutane analogue                 |
| Et <sub>2</sub> NHBH <sub>2</sub> NH <sub>2</sub> BH <sub>3</sub> ( <b>2b</b> )               | 1-N,N-diethyl-1,3-diaza-2,4-diborabutane analogue             |
| Et <sub>3</sub> NBH <sub>2</sub> NH <sub>2</sub> BH <sub>3</sub> ( <b>2c</b> )                | 1-N,N,N-triethyl-1,3-diaza-2,4-diborabutane analogue          |
| <sup>n</sup> PrNH <sub>2</sub> BH <sub>2</sub> NH <sub>2</sub> BH <sub>3</sub> ( <b>3a</b> )  | 1-N-propyl-1,3-diaza-2,4-diborabutane analogue                |
| <sup>n</sup> Pr <sub>2</sub> NHBH <sub>2</sub> NH <sub>2</sub> BH <sub>3</sub> ( <b>3b</b> )  | 1-N,N-dipropyl-1,3-diaza-2,4-diborabutane analogue            |
| <sup>n</sup> Pr <sub>3</sub> NBH <sub>2</sub> NH <sub>2</sub> BH <sub>3</sub> ( <b>3c</b> )   | 1-N,N,N-tripropyl-1,3-diaza-2,4-diborabutane analogue         |
| <sup>i</sup> PrNH <sub>2</sub> BH <sub>2</sub> NH <sub>2</sub> BH <sub>3</sub> ( <b>3d</b> )  | 1-N-isopropyl-1,3-diaza-2,4-diborabutane analogue             |
| <sup>i</sup> Pr <sub>2</sub> NHBH <sub>2</sub> NH <sub>2</sub> BH <sub>3</sub> ( <b>3e</b> )  | 1-N,N-diisopropyl-1,3-diaza-2,4-diborabutane analogue         |
| <sup>i</sup> Pr <sub>2</sub> MeNBH <sub>2</sub> NH <sub>2</sub> BH <sub>3</sub> ( <b>3f</b> ) | 1-N,N- methyl-diisopropyl-1,3-diaza-2,4-diborabutane analogue |

**Table S4** FTIR spectra assignments of the diborazanes.

| Diborazanes                                                                                  | B-H (cm <sup>-1</sup> ) | N-H (cm <sup>-1</sup> ) | B-N (cm <sup>-1</sup> ) | C-N (cm <sup>-1</sup> ) |
|----------------------------------------------------------------------------------------------|-------------------------|-------------------------|-------------------------|-------------------------|
| MeNH <sub>2</sub> HBH <sub>2</sub> NH <sub>2</sub> BH <sub>3</sub> ( <b>1a</b> )             | 2294.16                 | 3297.80                 | 1345.21                 | 1151.03                 |
| Me <sub>2</sub> NHBH <sub>2</sub> NH <sub>2</sub> BH <sub>3</sub> ( <b>1b</b> )              | 2317.50                 | 3277.49                 | 1319.42                 | 1159.62                 |
| Me <sub>3</sub> NBH <sub>2</sub> NH <sub>2</sub> BH <sub>3</sub> ( <b>1c</b> )               | 2312.28                 | 3299.97                 | 1471.56                 | 1148.88                 |
| EtNH <sub>2</sub> BH <sub>2</sub> NH <sub>2</sub> BH <sub>3</sub> ( <b>2a</b> )              | 2298.47                 | 3208.26                 | 1353.24                 | 1104.91                 |
| Et <sub>3</sub> NBH <sub>2</sub> NH <sub>2</sub> BH <sub>3</sub> ( <b>2c</b> )               | 2284.00                 | 3301.54                 | 1396.90                 | 1160.31                 |
| <sup>n</sup> PrNH <sub>2</sub> BH <sub>2</sub> NH <sub>2</sub> BH <sub>3</sub> ( <b>3a</b> ) | 2291.29                 | 3291.46                 | 1339.29                 | 1142.13                 |
| <sup>n</sup> Pr <sub>3</sub> NBH <sub>2</sub> NH <sub>2</sub> BH <sub>3</sub> ( <b>3c</b> )  | 2282.76                 | 3247.52                 | 1380.89                 | 1160.44                 |
| <sup>i</sup> PrNH <sub>2</sub> BH <sub>2</sub> NH <sub>2</sub> BH <sub>3</sub> ( <b>3d</b> ) | 2298.43                 | 3298.06                 | 1378.02                 | 1164.90                 |



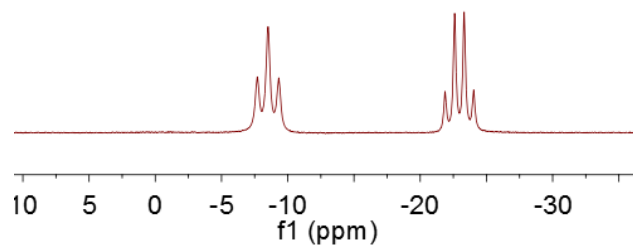

**Figure S3a**  $^{11}\text{B}$  NMR spectra of **1a** in  $\text{THF-}d_8$ .

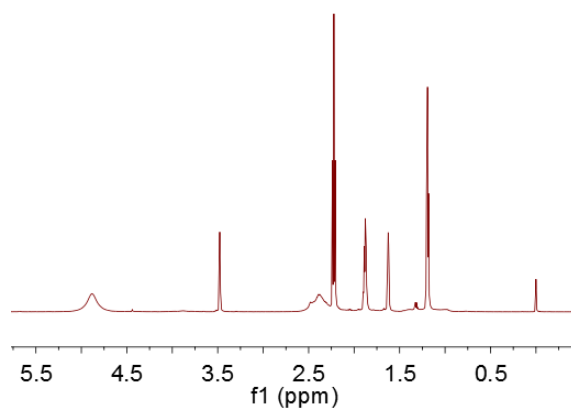

**Figure S3b**  $^1\text{H}\{^{11}\text{B}\}$  NMR spectra of **1a** in  $\text{THF-}d_8$ .

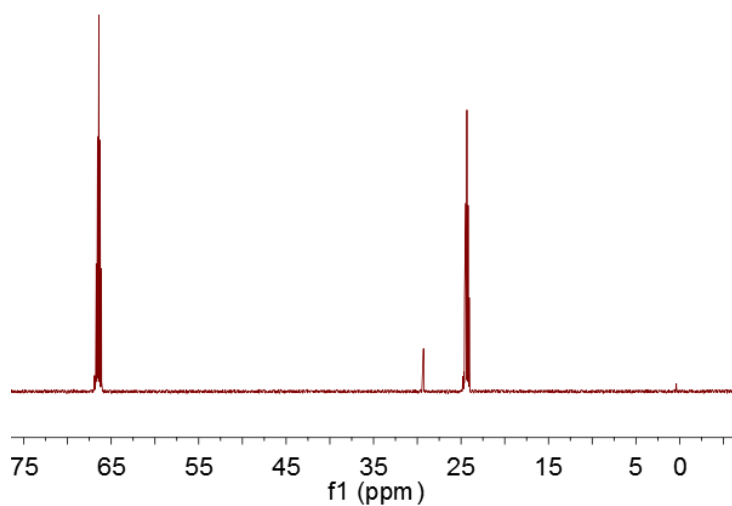

**Figure S3c**  $^{13}\text{C}\{^1\text{H}\}$  NMR spectra of **1a** in  $\text{THF-}d_8$ .

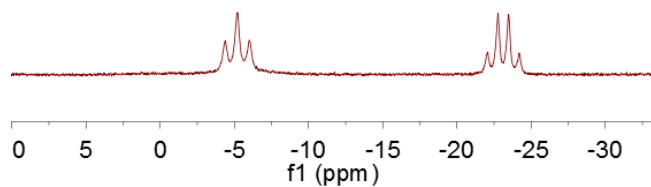

**Figure S3d**  $^{11}\text{B}$  NMR spectra of **1b** in  $\text{THF-}d_8$ .

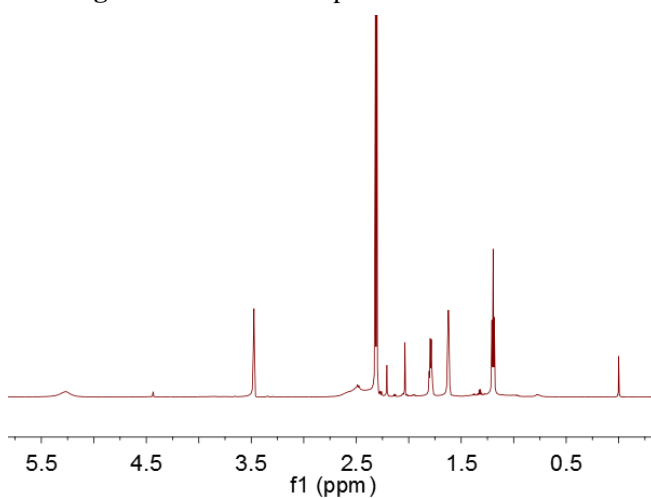

**Figure S3e**  $^1\text{H}\{^{11}\text{B}\}$  NMR spectra of **1b** in  $\text{THF-}d_8$ .

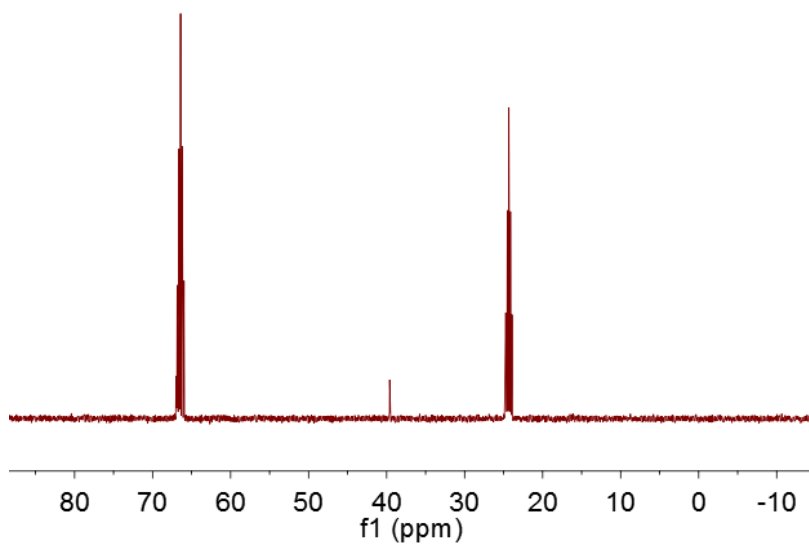

**Figure S3f**  $^{13}\text{C}\{^1\text{H}\}$  NMR spectra of **1b** in  $\text{THF-}d_8$ .

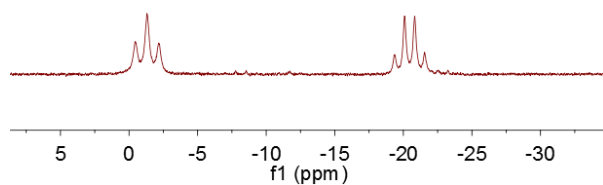

**Figure S3g**  $^{11}\text{B}$  NMR spectra of **1c** in  $\text{THF-}d_8$ .

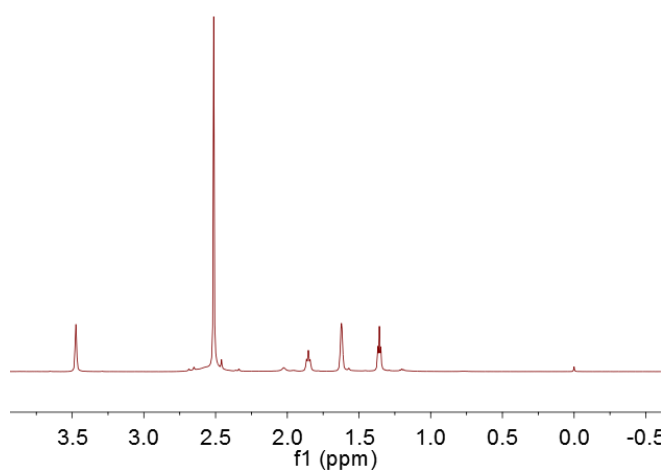

**Figure S3h**  $^1\text{H}\{^{11}\text{B}\}$  NMR spectra of **1c** in  $\text{THF-}d_8$ .

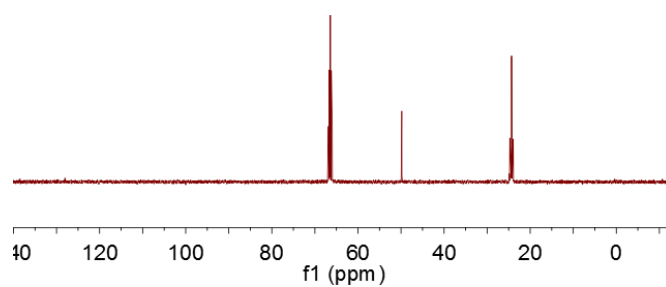

**Figure S3i**  $^{13}\text{C}\{^1\text{H}\}$  NMR spectra of **1c** in  $\text{THF-}d_8$ .

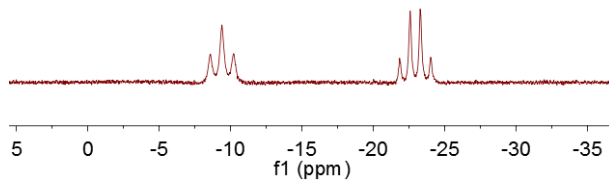

**Figure S3j**  $^{11}\text{B}$  NMR spectra of **2a** in  $\text{THF-}d_8$ .

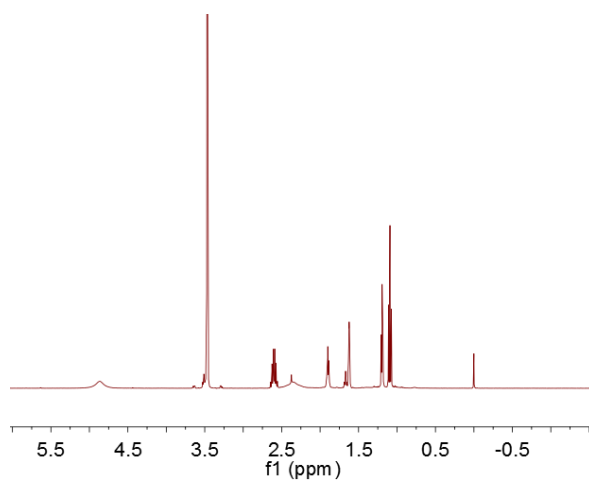

**Figure S3k**  $^1\text{H}\{^{11}\text{B}\}$  NMR spectra of **2a** in  $\text{THF-}d_8$ .

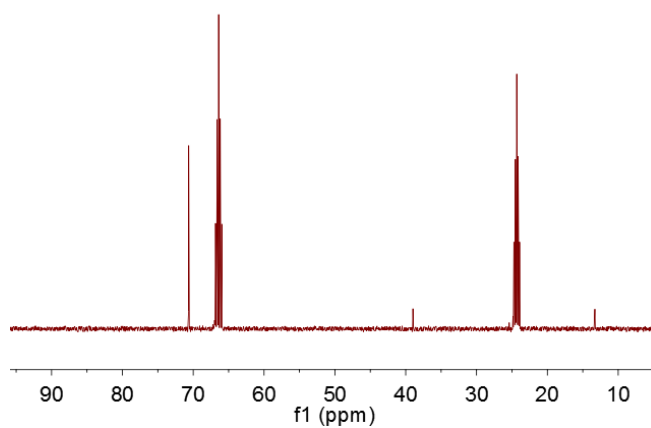

**Figure S3l**  $^{13}\text{C}\{^1\text{H}\}$  NMR spectra of **2a** in  $\text{THF-}d_8$ .

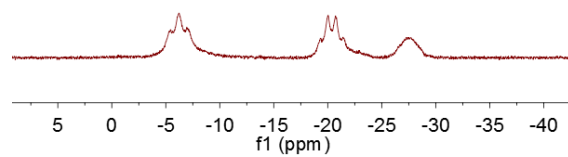

**Figure S3m**  $^{11}\text{B}$  NMR spectra of **2c** in  $\text{THF-}d_8$ .

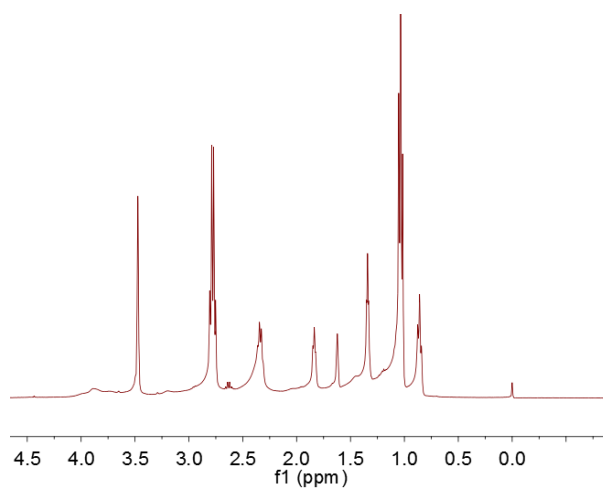

**Figure S3n**  $^1\text{H}\{^{11}\text{B}\}$  NMR spectra of **2c** in  $\text{THF-}d_8$ .

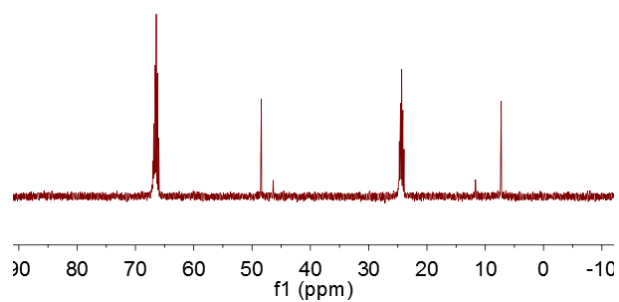

**Figure S3o**  $^{13}\text{C}\{^1\text{H}\}$  NMR spectra of **2c** in  $\text{THF-}d_8$ .

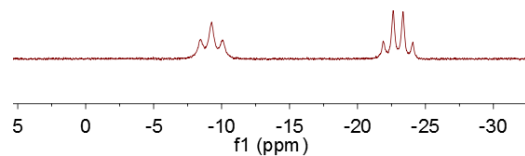

**Figure S3p**  $^{11}\text{B}$  NMR spectra of **3a** in  $\text{THF-}d_8$ .

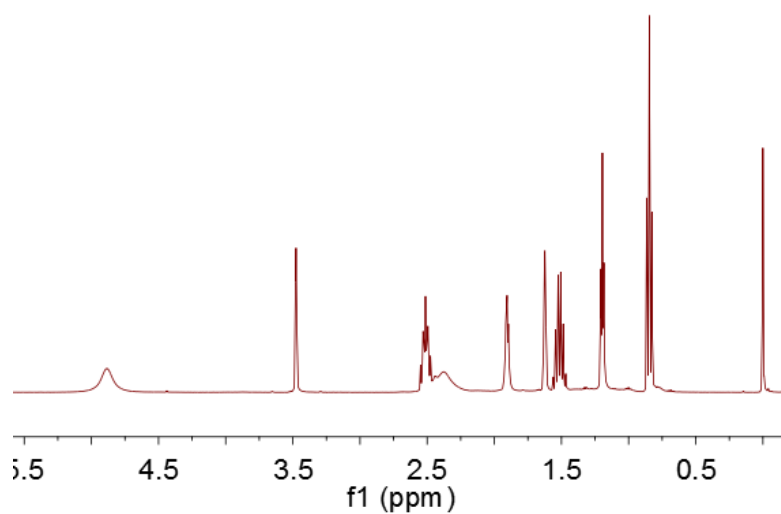

**Figure S3q**  $^1\text{H}\{^{11}\text{B}\}$  NMR spectra of **3a** in  $\text{THF-}d_8$ .

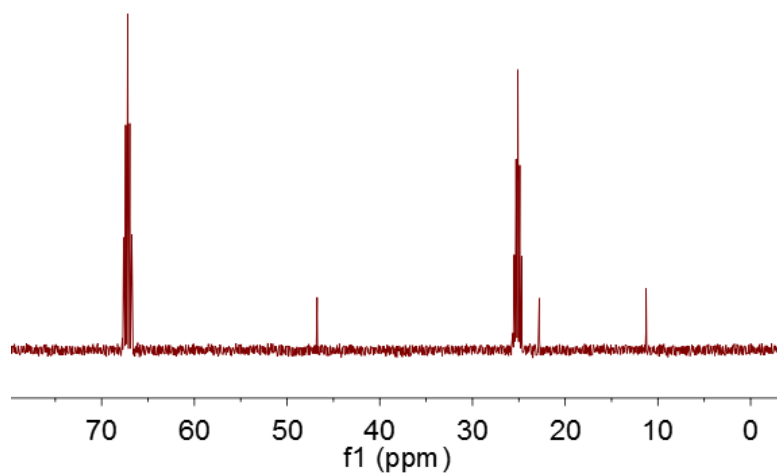

**Figure S3r**  $^{13}\text{C}\{^1\text{H}\}$  NMR spectra of **3a** in  $\text{THF-}d_8$ .

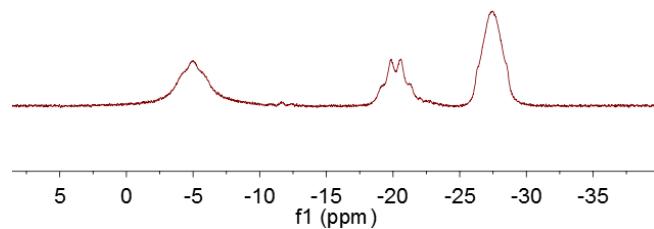

**Figure S3s**  $^{11}\text{B}$  NMR spectra of **3c** in  $\text{THF-}d_8$ .

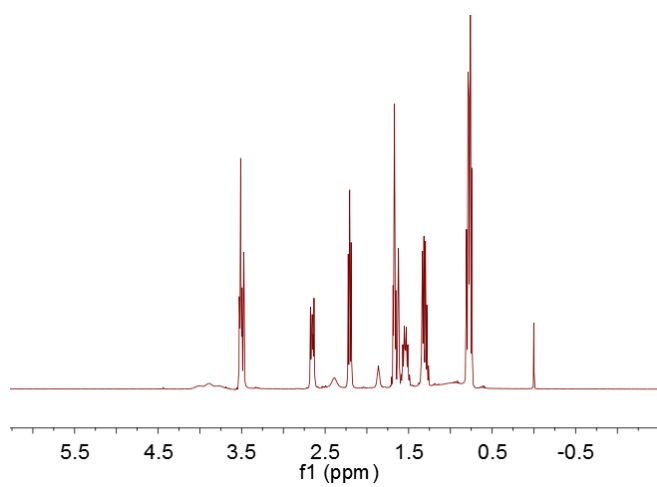

**Figure S3t**  $^1\text{H}\{^{11}\text{B}\}$  NMR spectra of **3c** in  $\text{THF-}d_8$ .

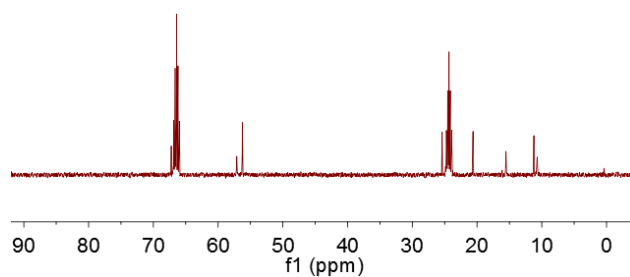

**Figure S3u**  $^{13}\text{C}\{^1\text{H}\}$  NMR spectra of **3c** in  $\text{THF-}d_8$ .

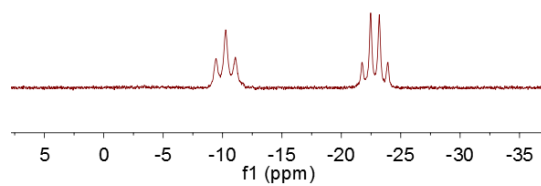

**Figure S3v**  $^{11}\text{B}$  NMR spectra of **3d** in  $\text{THF-}d_8$ .

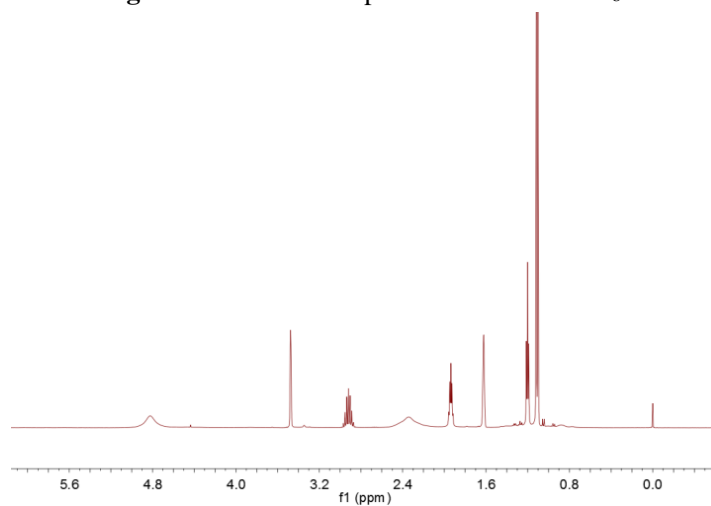

**Figure S3w**  $^1\text{H}\{^{11}\text{B}\}$  NMR spectra of **3d** in  $\text{THF-}d_8$ .

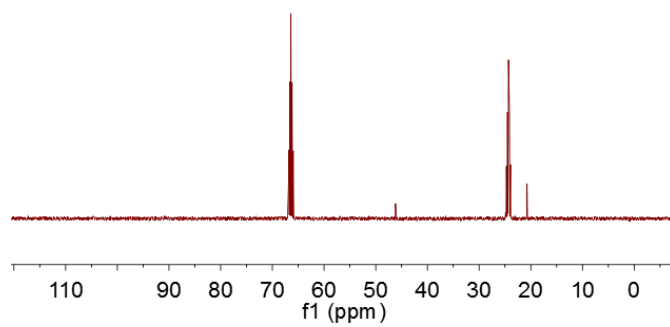

**Figure S3x**  $^{13}\text{C}\{^1\text{H}\}$  NMR spectra of **3d** in  $\text{THF-}d_8$ .



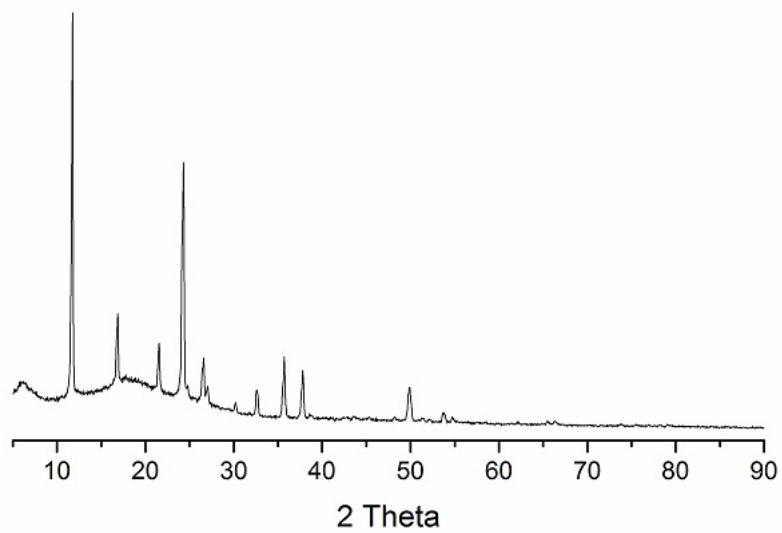

**Figure S3y** X-ray powder diffraction data of **1a**.

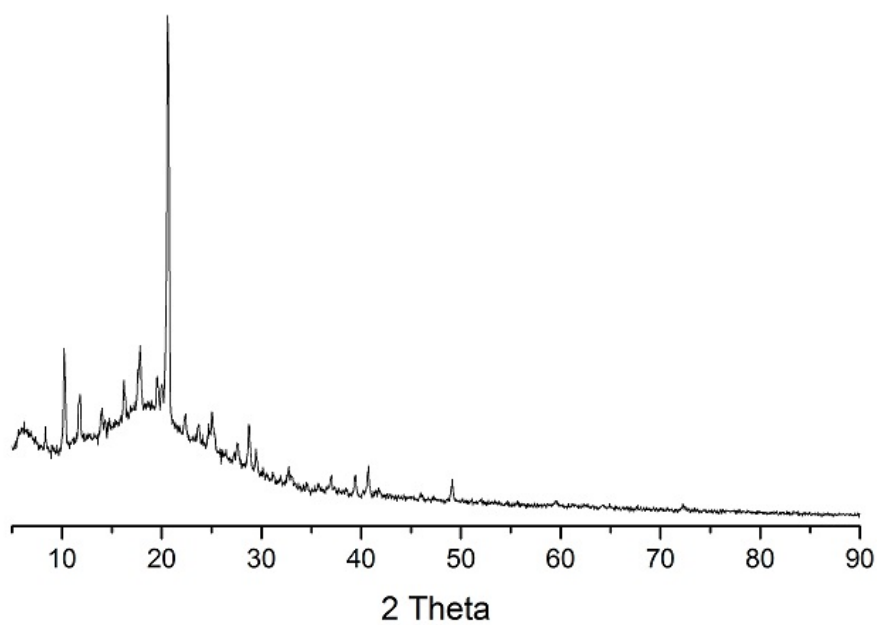

**Figure S3z** X-ray powder diffraction data of **1b**.

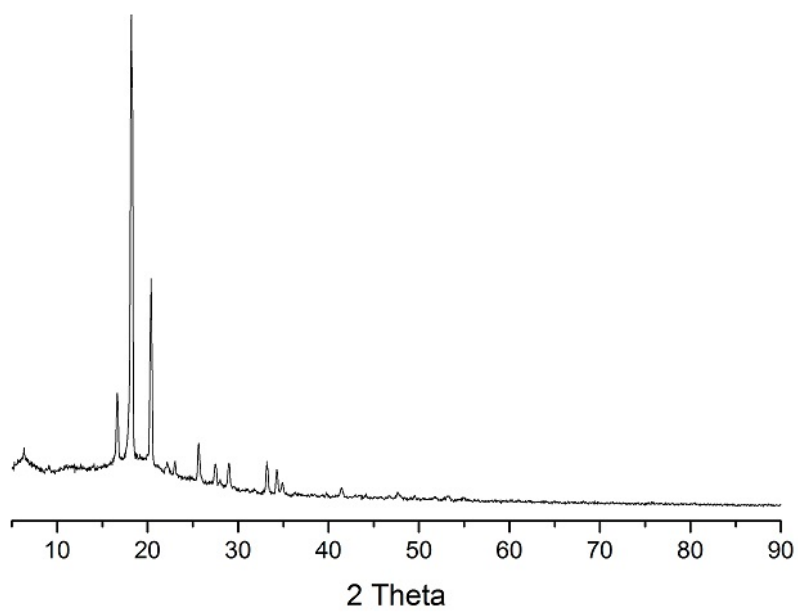

**Figure S3aa** X-ray powder diffraction data of **1c**.

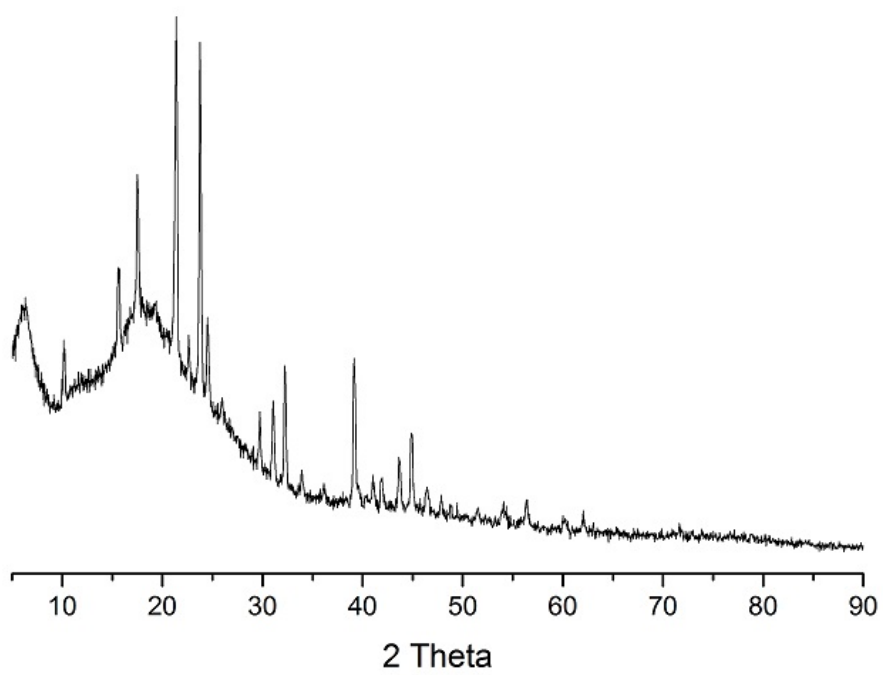

**Figure S3ab** X-ray powder diffraction data of **2a**.

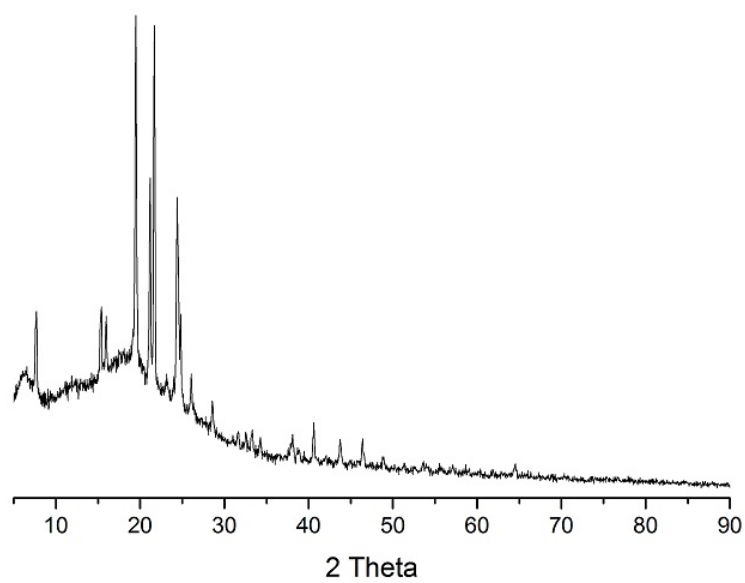

**Figure S3ac** X-ray powder diffraction data of **3a**.

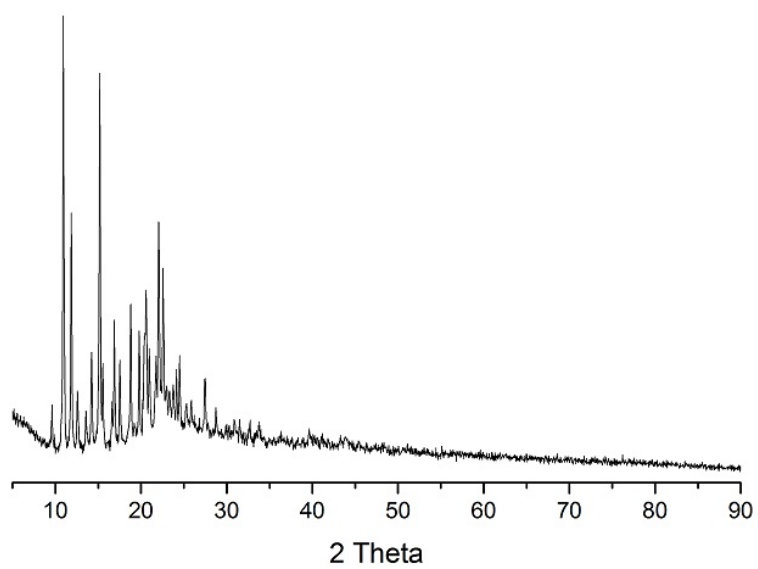

**Figure S3ad** X-ray powder diffraction data of **3c**.

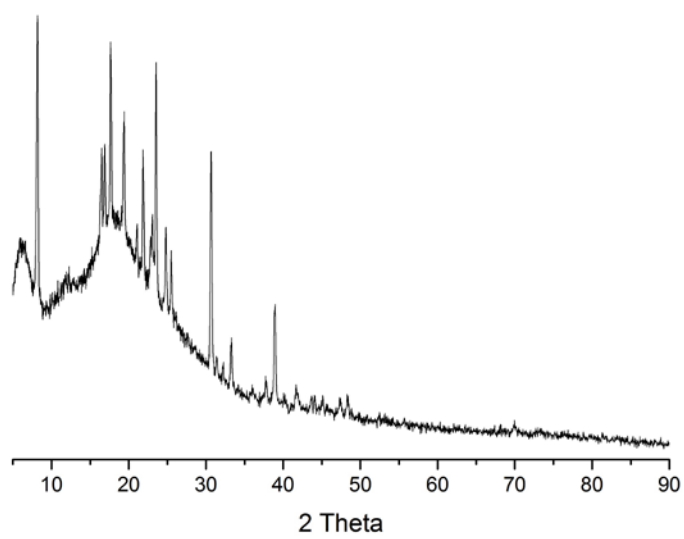

**Figure S3ae** X-ray powder diffraction data of **3d**.

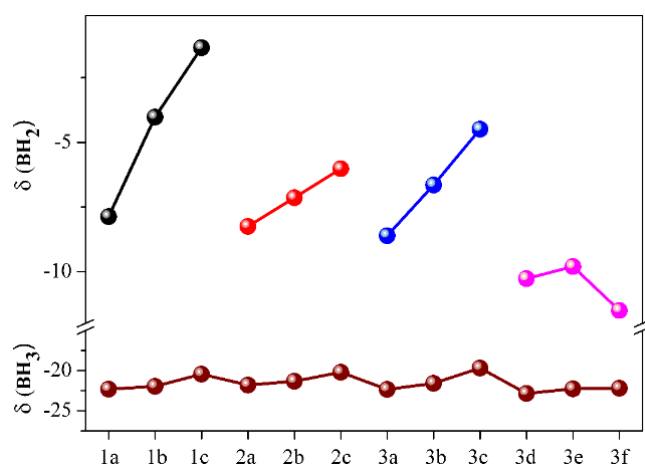

**Figure S4** The  $^{11}\text{B}$  NMR chemical shift of the diborazanes.

**Table S5** The experiment and calculated chemical shifts of B in the diborazanes.

| Diborazanes                                                                                   | $\delta$ (BH <sub>2</sub> ) | $\delta$ (BH <sub>3</sub> ) |
|-----------------------------------------------------------------------------------------------|-----------------------------|-----------------------------|
| MeNH <sub>2</sub> BH <sub>2</sub> NH <sub>2</sub> BH <sub>3</sub> ( <b>1a</b> )               | -7.87                       | -22.31                      |
| Me <sub>2</sub> NHBH <sub>2</sub> NH <sub>2</sub> BH <sub>3</sub> ( <b>1b</b> )               | -4.02                       | -21.96                      |
| Me <sub>3</sub> NBH <sub>2</sub> NH <sub>2</sub> BH <sub>3</sub> ( <b>1c</b> )                | -1.34                       | -20.44                      |
| EtNH <sub>2</sub> BH <sub>2</sub> NH <sub>2</sub> BH <sub>3</sub> ( <b>2a</b> )               | -8.25                       | -21.80                      |
| Et <sub>2</sub> NHBH <sub>2</sub> NH <sub>2</sub> BH <sub>3</sub> ( <b>2b</b> )               | -7.14                       | -21.32                      |
| Et <sub>3</sub> NBH <sub>2</sub> NH <sub>2</sub> BH <sub>3</sub> ( <b>2c</b> )                | -6.02                       | -20.21                      |
| <sup>n</sup> PrNH <sub>2</sub> BH <sub>2</sub> NH <sub>2</sub> BH <sub>3</sub> ( <b>3a</b> )  | -8.61                       | -22.34                      |
| <sup>n</sup> Pr <sub>2</sub> NHBH <sub>2</sub> NH <sub>2</sub> BH <sub>3</sub> ( <b>3b</b> )  | -6.65                       | -21.58                      |
| <sup>n</sup> Pr <sub>3</sub> NBH <sub>2</sub> NH <sub>2</sub> BH <sub>3</sub> ( <b>3c</b> )   | -4.49                       | -19.68                      |
| <sup>i</sup> PrNH <sub>2</sub> BH <sub>2</sub> NH <sub>2</sub> BH <sub>3</sub> ( <b>3d</b> )  | -10.27                      | -22.85                      |
| <sup>i</sup> Pr <sub>2</sub> NHBH <sub>2</sub> NH <sub>2</sub> BH <sub>3</sub> ( <b>3e</b> )  | -9.80                       | -22.27                      |
| <sup>i</sup> Pr <sub>2</sub> MeNBH <sub>2</sub> NH <sub>2</sub> BH <sub>3</sub> ( <b>3f</b> ) | -11.50                      | -22.20                      |
| NH <sub>3</sub> BH <sub>2</sub> NH <sub>2</sub> BH <sub>3</sub>                               | -11.60                      | -22.80                      |

**Table S6** The chemical shifts of H in the diborazanes.

| $R_1R_2R_3NBH_2NH_2BH_3$                                                                    | $\delta$ (B1H) | $\delta$ (B2H) | $\delta$ (N1H) | $\delta$ (N2H) |
|---------------------------------------------------------------------------------------------|----------------|----------------|----------------|----------------|
| MeNH <sub>2</sub> BH <sub>2</sub> NH <sub>2</sub> BH <sub>3</sub> ( <b>1a</b> )             | 1.89           | 1.19           | 4.88           | 2.39           |
| Me <sub>2</sub> NHBH <sub>2</sub> NH <sub>2</sub> BH <sub>3</sub> ( <b>1b</b> )             | 1.79           | 1.20           | 5.27           | 2.48           |
| Me <sub>3</sub> NBH <sub>2</sub> NH <sub>2</sub> BH <sub>3</sub> ( <b>1c</b> )              | 1.85           | 1.20           | -              | 2.61           |
| EtNH <sub>2</sub> BH <sub>2</sub> NH <sub>2</sub> BH <sub>3</sub> ( <b>2a</b> )             | 1.90           | 1.19           | 4.87           | 2.37           |
| Et <sub>3</sub> NBH <sub>2</sub> NH <sub>2</sub> BH <sub>3</sub> ( <b>2c</b> )              | 1.84           | 1.34           | -              | 2.40           |
| <sup>15</sup> NH <sub>2</sub> BH <sub>2</sub> NH <sub>2</sub> BH <sub>3</sub> ( <b>3a</b> ) | 1.90           | 1.20           | 4.88           | 2.38           |
| <sup>15</sup> N <sub>3</sub> NBH <sub>2</sub> NH <sub>2</sub> BH <sub>3</sub> ( <b>3c</b> ) | 1.86           | 1.28           | -              | 2.40           |
| <sup>17</sup> NH <sub>2</sub> BH <sub>2</sub> NH <sub>2</sub> BH <sub>3</sub> ( <b>3d</b> ) | 1.94           | 1.20           | 4.86           | 2.34           |
| NH <sub>3</sub> BH <sub>2</sub> NH <sub>2</sub> BH <sub>3</sub>                             | 2.06           | 1.30           | 4.57           | 2.35           |

**Table S7** Bond angles and dihedral angles of the diborazanes.

|             | Angles (°)                                                   |                                                                            |                                                                            |                                                                                                                                               |                                                                            |                                                                                                                |                                                                            |
|-------------|--------------------------------------------------------------|----------------------------------------------------------------------------|----------------------------------------------------------------------------|-----------------------------------------------------------------------------------------------------------------------------------------------|----------------------------------------------------------------------------|----------------------------------------------------------------------------------------------------------------|----------------------------------------------------------------------------|
|             | CH <sub>12</sub> B <sub>2</sub> N <sub>2</sub> ( <b>1a</b> ) | C <sub>2</sub> H <sub>14</sub> B <sub>2</sub> N <sub>2</sub> ( <b>1b</b> ) | C <sub>3</sub> H <sub>16</sub> B <sub>2</sub> N <sub>2</sub> ( <b>1c</b> ) | C <sub>16</sub> H <sub>52</sub> B <sub>4</sub> N <sub>4</sub> O <sub>6</sub><br>(C <sub>12</sub> H <sub>24</sub> O <sub>6</sub> · <b>2a</b> ) | C <sub>6</sub> H <sub>22</sub> B <sub>2</sub> N <sub>2</sub> ( <b>2c</b> ) | C <sub>13</sub> H <sub>36</sub> B <sub>4</sub> N <sub>4</sub><br>(C <sub>4</sub> H <sub>8</sub> O· <b>3c</b> ) | C <sub>3</sub> H <sub>16</sub> B <sub>2</sub> N <sub>2</sub> ( <b>3d</b> ) |
| N2-B1-N1    | 108.17(14)                                                   | 109.3(2)                                                                   | 110.56(6)                                                                  | 110.05(15)                                                                                                                                    | 111.3(2)                                                                   | 111.42(10)                                                                                                     | 108.61(6)                                                                  |
| B1-N2-B2    | 115.31(14)                                                   | 117.5(2)                                                                   | 114.13(6)                                                                  | 114.89(16)                                                                                                                                    | 113.7(2)                                                                   | 113.37(10)                                                                                                     | 112.67(6)                                                                  |
| N1-B1-N2-B2 | 180                                                          | 55.59                                                                      | 177.33                                                                     | 169.49                                                                                                                                        | 177.93                                                                     | 171.14                                                                                                         | 178.60                                                                     |

**Table S8** Bond lengths of the diborazanes.

|                                                                                                                                            | Bond lengths (Å) |            |            |              |              |              |                     |
|--------------------------------------------------------------------------------------------------------------------------------------------|------------------|------------|------------|--------------|--------------|--------------|---------------------|
|                                                                                                                                            | B1-N1            | B1-N2      | B2-N2      | N1-H         | B1-H         | N2-H         | B2-H                |
| CH <sub>12</sub> B <sub>2</sub> N <sub>2</sub> ( <b>1a</b> )                                                                               | 1.595(2)         | 1.560(2)   | 1.601(2)   | 0.845        | 1.128        | 0.884        | 1.149, 1.120        |
| C <sub>2</sub> H <sub>14</sub> B <sub>2</sub> N <sub>2</sub> ( <b>1b</b> )                                                                 | 1.591(3)         | 1.557(4)   | 1.596(4)   | 0.979        | 1.117, 1.125 | 0.890        | 1.135, 1.128, 1.119 |
| C <sub>3</sub> H <sub>16</sub> B <sub>2</sub> N <sub>2</sub> ( <b>1c</b> )                                                                 | 1.6269(11)       | 1.5594(11) | 1.6090(11) | -            | 1.115, 1.112 | 0.897, 0.929 | 1.135, 1.104        |
| C <sub>16</sub> H <sub>52</sub> B <sub>4</sub> N <sub>4</sub> O <sub>6</sub> (C <sub>12</sub> H <sub>24</sub> O <sub>6</sub> · <b>2a</b> ) | 1.593(2)         | 1.546(3)   | 1.605(3)   | 0.838, 0.851 | 1.113        | 0.823, 0.903 | 1.113, 1.115, 1.116 |
| C <sub>6</sub> H <sub>22</sub> B <sub>2</sub> N <sub>2</sub> ( <b>2c</b> )                                                                 | 1.631(4)         | 1.563(4)   | 1.619(4)   | -            | 1.111, 1.120 | 0.910        | 1.132, 1.122, 1.125 |
| C <sub>13</sub> H <sub>36</sub> B <sub>2</sub> N <sub>2</sub> O(C <sub>4</sub> H <sub>8</sub> O· <b>3c</b> )                               | 1.6482(16)       | 1.5497(17) | 1.6100(17) | -            | 1.121, 1.103 | 0.884, 0.866 | 1.111, 1.119        |
| C <sub>3</sub> H <sub>16</sub> B <sub>2</sub> N <sub>2</sub> ( <b>3d</b> )                                                                 | 1.6019(11)       | 1.5633(11) | 1.6048(11) | 0.910        | 1.115, 1.101 | 0.910        | 1.151, 1.155, 1.140 |

**Table S9** The inter-/intramolecular DHBs and hydrogen bond (HB) of the diborazanes.\*

|                                                               | Types of DHBs/HBs   |         | H...H/O distance in Å ( <i>amounts</i> )                                               |
|---------------------------------------------------------------|---------------------|---------|----------------------------------------------------------------------------------------|
| <b>1a</b>                                                     | Intermolecular DHBs | NH...HB | 1.972 (4); 2.043(4); 2.372 (4); 2.402 (4); 2.410 (4);                                  |
|                                                               |                     | CH...HB | 2.180 (2)                                                                              |
|                                                               | Intramolecular DHBs | CH...HN | 2.335 (2); 2.403 (2)                                                                   |
| <b>1b</b>                                                     | Intermolecular DHBs | NH...HB | 2.115 (2); 2.121 (2); 2.401 (2); 2.417 (2); 2.431 (2);                                 |
|                                                               |                     | CH...HB | 2.387 (2)                                                                              |
|                                                               | Intramolecular DHBs | NH...HB | 2.154 (1); 2.458 (1); 2.491 (1)                                                        |
|                                                               |                     | CH...HN | 2.261 (1); 2.348 (1); 2.377 (1); 2.386 (1); 2.403 (1)                                  |
|                                                               |                     | CH...HB | 2.154 (1); 2.486 (1)                                                                   |
| <b>1c</b>                                                     | Intermolecular DHBs | NH...HB | 2.090 (2); 2.076 (2)                                                                   |
|                                                               |                     | CH...HB | 2.231 (1); 2.449 (2); 2.457 (2); 2.491 (2)                                             |
|                                                               | Intramolecular DHBs | NH...HB | 2.458 (1)                                                                              |
|                                                               |                     | CH...HN | 2.204 (1); 2.211 (1)                                                                   |
|                                                               |                     | CH...HB | 2.369 (1); 2.405 (1); 2.479 (1); 2.499 (1)                                             |
| C <sub>12</sub> H <sub>24</sub><br>O <sub>6</sub> · <b>2a</b> | Hydrogen Bonds      | NH...O  | 2.037 (1); 2.132 (1)                                                                   |
|                                                               | Intermolecular DHBs | NH...HB | 1.849 (2); 2.233 (2); 2.471 (2)                                                        |
|                                                               |                     | CH...HB | 2.47 (1); 2.39 (1); 2.47 (1)                                                           |
|                                                               | Intramolecular DHBs | NH...HB | 2.490 (1)                                                                              |
|                                                               |                     | CH...HN | 2.372 (1); 2.464 (1); 2.497 (1)                                                        |
|                                                               |                     | CH...HB | 2.435 (1)                                                                              |
| <b>2c</b>                                                     | Intermolecular DHBs | NH...HB | 2.091 (2); 2.441 (2)                                                                   |
|                                                               |                     | CH...HB | 2.139 (2); 2.226 (1); 2.262 (2); 2.322 (1); 2.409 (2); 2.421 (1); 2.450(1); 2.497 (1); |
|                                                               | Intramolecular DHBs | CH...HN | 2.121 (1); 2.130 (1); 2.425 (1); 2.443 (1)                                             |
|                                                               |                     | CH...HB | 2.139 (1); 2.096 (1); 2.369 (1); 2.422 (1);                                            |
| C <sub>4</sub> H <sub>8</sub> O<br>· <b>3c</b>                | Hydrogen Bond       | NH...O  | 2.044 (1)                                                                              |
|                                                               | Intermolecular DHBs | NH...HB | 2.017 (2); 2.341 (2);                                                                  |
|                                                               |                     | CH...HB | 2.284 (2); 2.343 (1); 2.355 (2); 2.373 (1); 2.417 (1); 2.461 (2);                      |
|                                                               | Intramolecular DHBs | NH...HB | 2.476 (1); 2.481 (1); 2.490 (1)                                                        |
|                                                               |                     | CH...HN | 2.096 (1); 2.234 (1)                                                                   |
|                                                               |                     | CH...HB | 2.151 (1); 2.260 (1); 2.278 (1); 2.338 (1)                                             |
| <b>3d</b>                                                     | Intermolecular DHBs | NH...HB | 1.995 (2); 2.048 (2); 2.091 (2); 2.112 (2); 2.160 (2); 2.298 (2); 2.331(2)             |
|                                                               |                     | NH...HN | 2.353 (1)                                                                              |
|                                                               |                     | CH...HB | 2.417 (2); 2.421 (1); 2.426 (2); 2.427 (1); 2.439 (1); 2.470 (1)                       |
|                                                               | Intramolecular DHBs | NH...HB | 2.483 (1)                                                                              |
|                                                               |                     | CH...HN | 2.322 (1); 2.401 (1); 2.469 (1)                                                        |
|                                                               |                     | CH...HB | 2.387 (1); 2.491 (1)                                                                   |

\*the bond lengths were normalized based on an N–H bond of 1.03 Å, a B–H bond of



1.21 Å, and C-H bond of 1.09 Å. Refs: (a) T. B. Richardson, S. D. Gala and R. H. Crabtree, *J. Am. Chem. Soc.*, **1995**, 117, 12875; (b) W. T. Klooster, T. F. Koetzle, P. E. M. Siegbahn, T. B. Richardson and R. H. Crabtree, *J. Am. Chem. Soc.*, **1999**, 121, 6337. (c) G. A. Jeffrey and W. Saenger, *Hydrogen bonding in biological structure*, Springer, Berlin, **1994**. (d) <https://cccbdb.nist.gov/exp1x.asp>

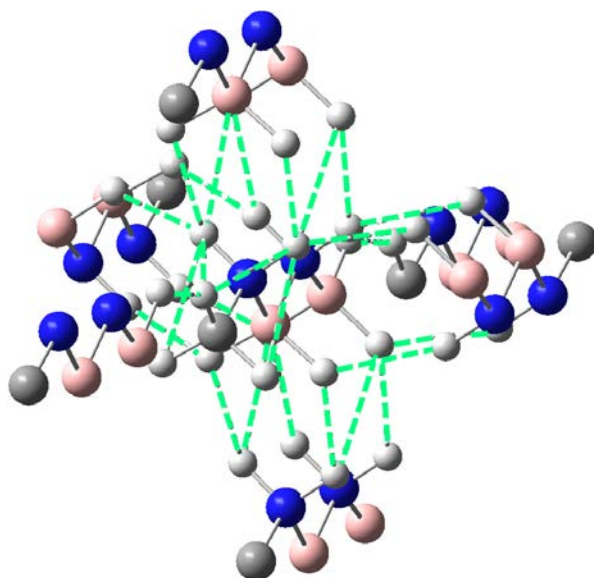

**Figure S5a** Intermolecular DHBs of **1a** (N, blue; B, pink; C, gray; H, light-gray).

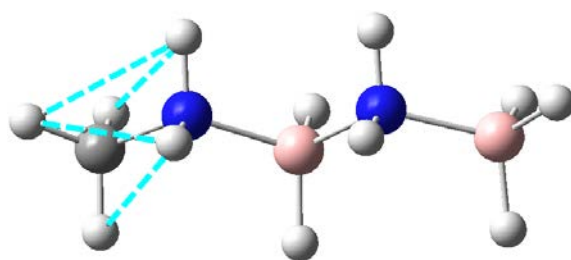

**Figure S5b** Intramolecular DHBs of **1a** (N, blue; B, pink; C, gray; H, light-gray).

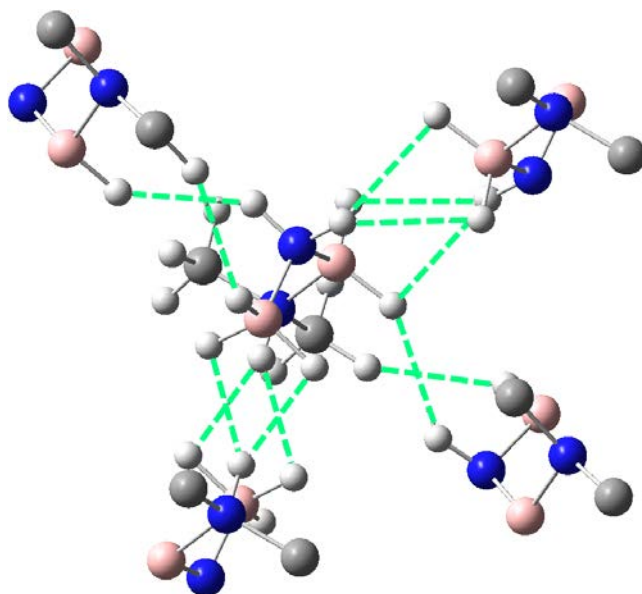

**Figure S5c** Intermolecular DHBs of **1b** (N, blue; B, pink; C, gray; H, light-gray).

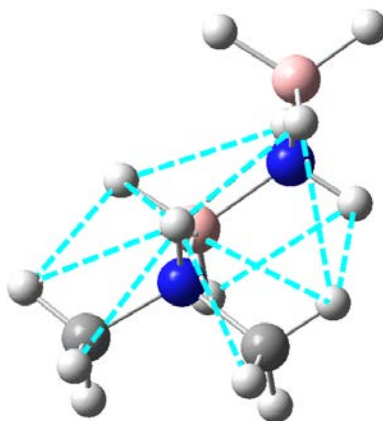

**Figure S5d** Intramolecular DHBs of **1b** (N, blue; B, pink; C, gray; H, light-gray).

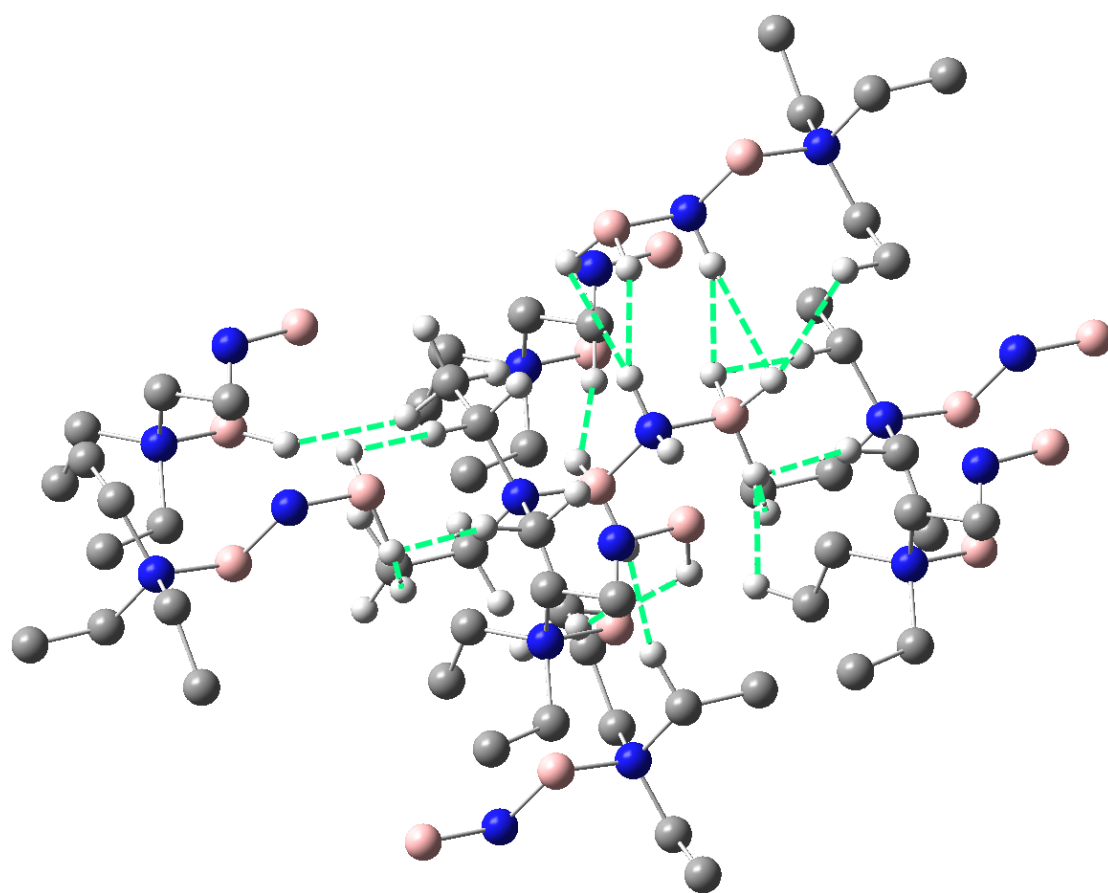

**Figure S5e** Intermolecular DHBs of **1c** (N, blue; B, pink; C, gray; H, light-gray).

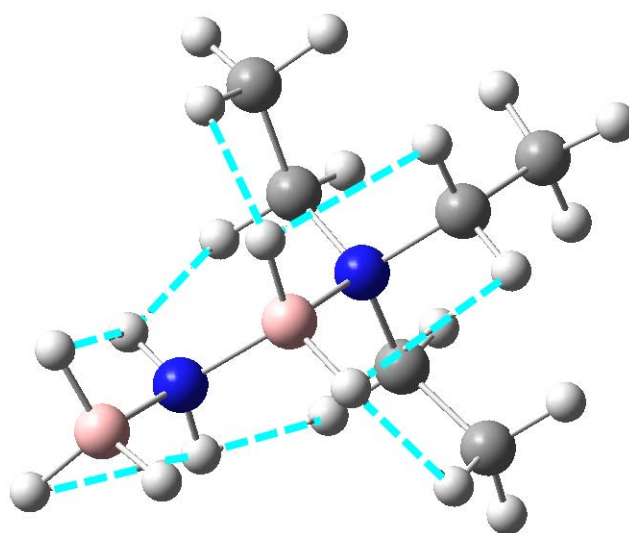

**Figure S5f** Intramolecular DHBs of **1c** (N, blue; B, pink; C, gray; H, light-gray).

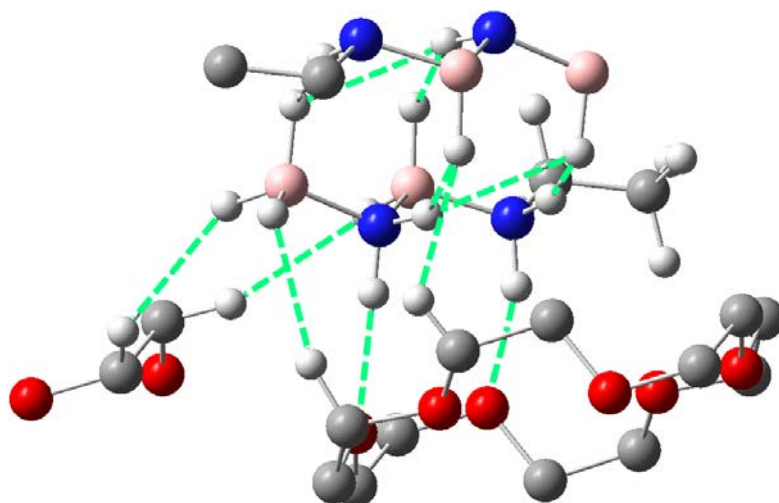

**Figure S5g** Intermolecular DHBs of C<sub>12</sub>H<sub>24</sub>O<sub>6</sub>·2a (N, blue; B, pink; C, gray; O, red; H, light-gray).

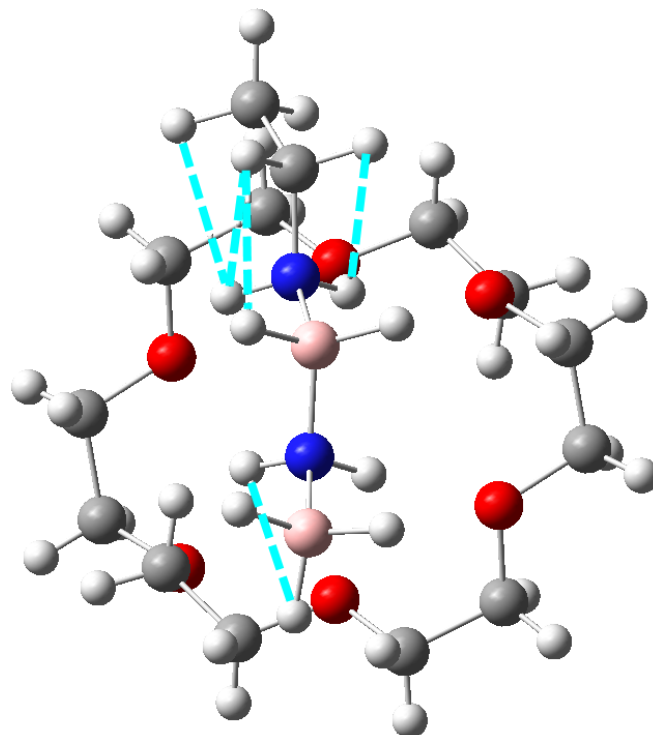

**Figure S5h** Intramolecular DHBs of C<sub>12</sub>H<sub>24</sub>O<sub>6</sub>·2a (N, blue; B, pink; C, gray; O, red; H, light-gray).

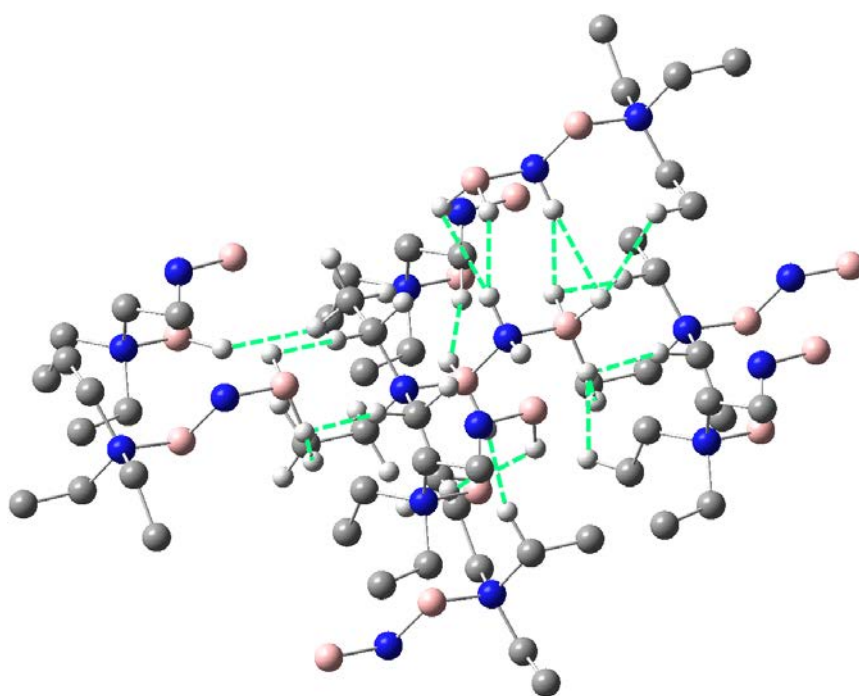

**Figure S5i** Intermolecular DHBs of **2c** (N, blue; B, pink; C, gray; H, light-gray).

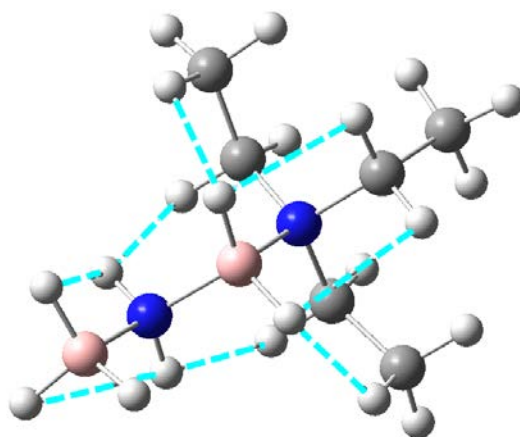

**Figure S5j** Intramolecular DHBs of **2c** (N, blue; B, pink; C, gray; H, light-gray).

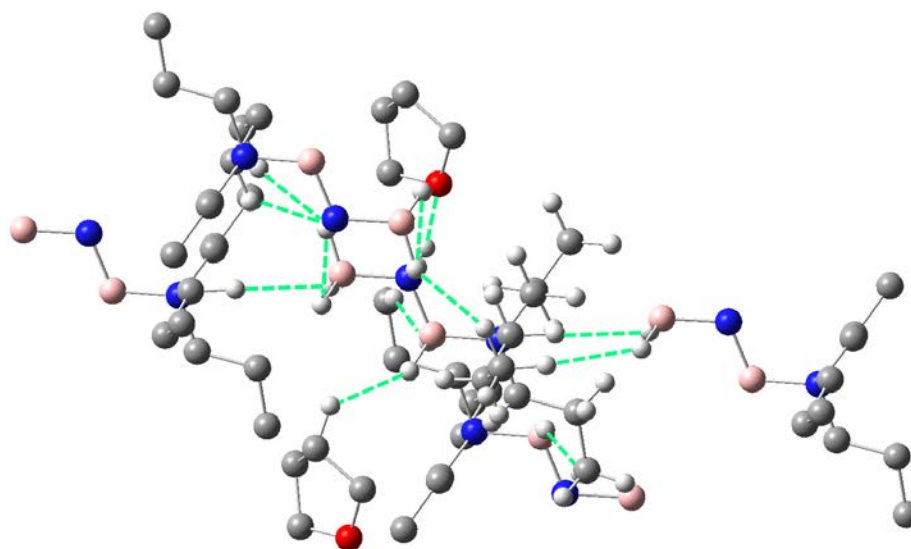

**Figure S5k** Intermolecular DHBs of  $C_4H_8O \cdot 3c$  (N, blue; B, pink; C, gray; O, red; H, light-gray).

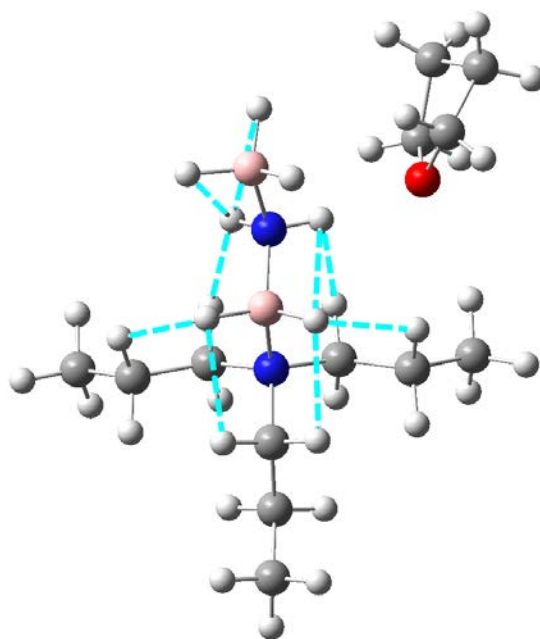

**Figure S5l** Intramolecular DHBs of  $C_4H_8O \cdot 3c$  (N, blue; B, pink; C, gray; O, red; H, light-gray).

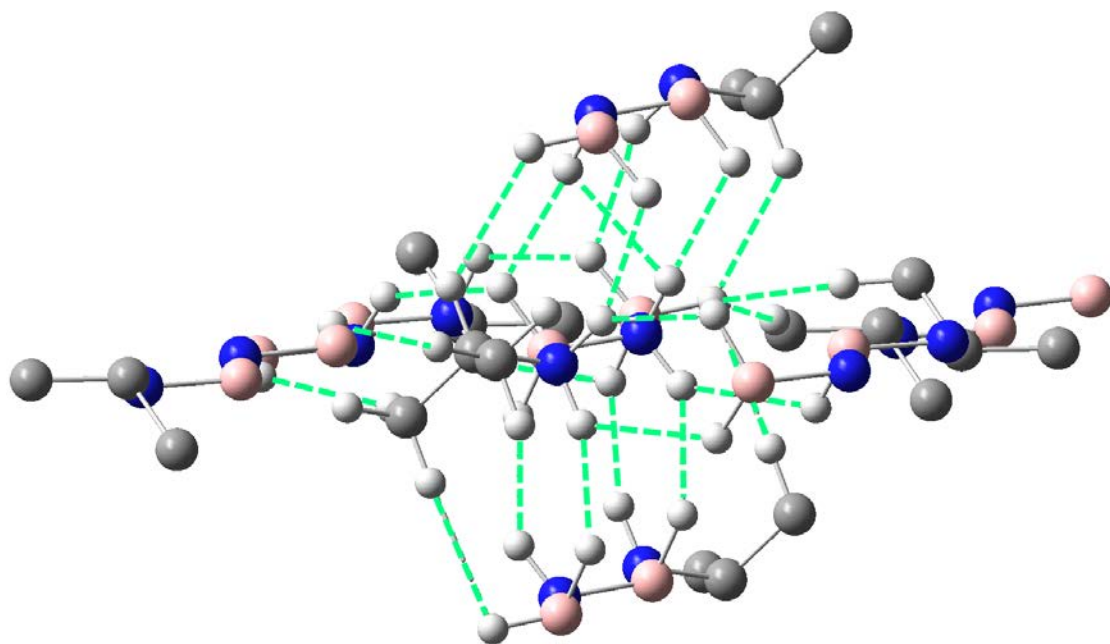

**Figure S5m** Intermolecular DHBs of **3d** (N, blue; B, pink; C, gray; H, light-gray).

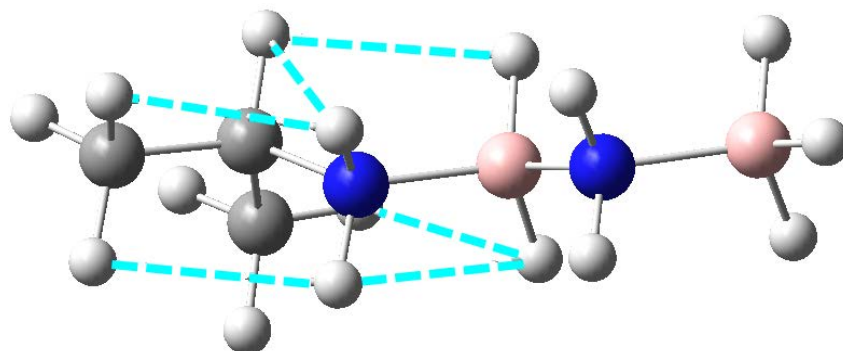

**Figure S5n** Intramolecular DHBs of **3d** (N, blue; B, pink; C, gray; H, light-gray).

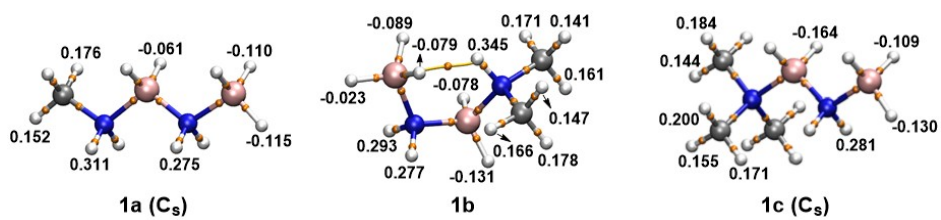

Figure S6a The NPA value and CPs of mono-molecule 1a, 1b and 1c. (Because the  $C_s$  symmetry of 1a and 1c, here the charge value of hydrogen atoms show only half. Bond critical point, orange; N, blue; B, pink; C, gray; H, light-gray).

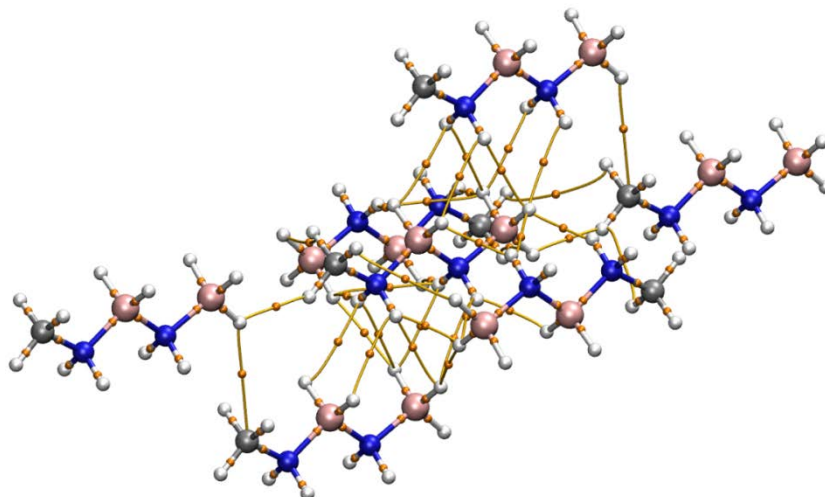

Figure S6b The CPs of 1a intermolecular DHB interaction (Bond critical point, orange; N, blue; B, pink; C, gray; H, light-gray).



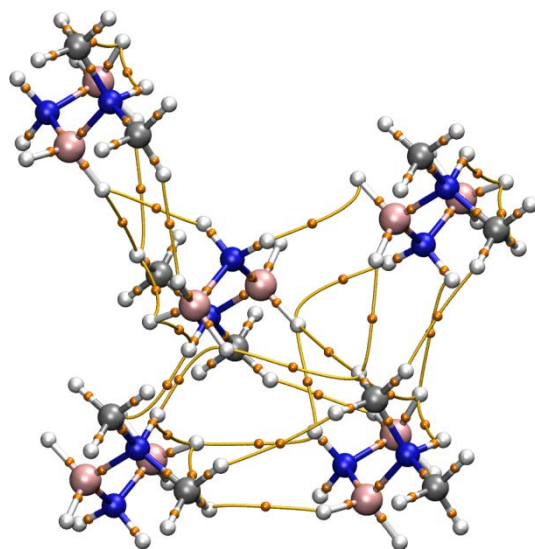

Figure S6c The BCPs of 1b intermolecular DHB interaction (Bond critical point, orange; N, blue; B, pink; C, gray; H, light-gray).

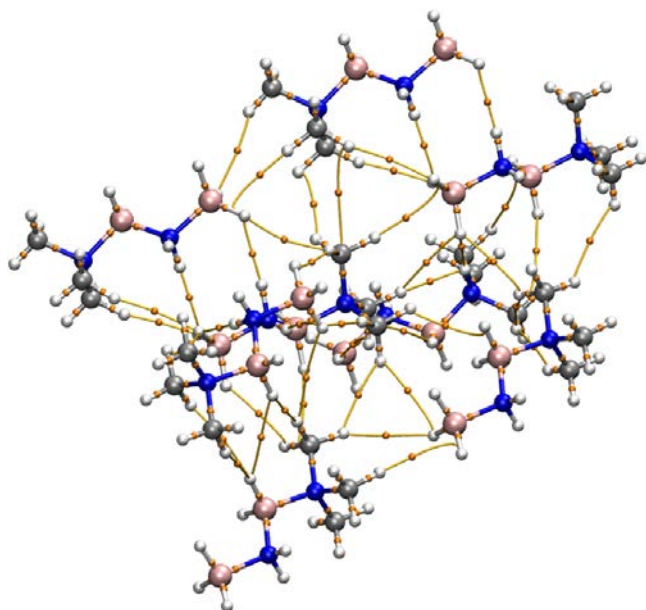

Figure S6d The BCPs of 1c intermolecular DHB interaction (Bond critical point, orange; N, blue; B, pink; C, gray; H, light-gray).

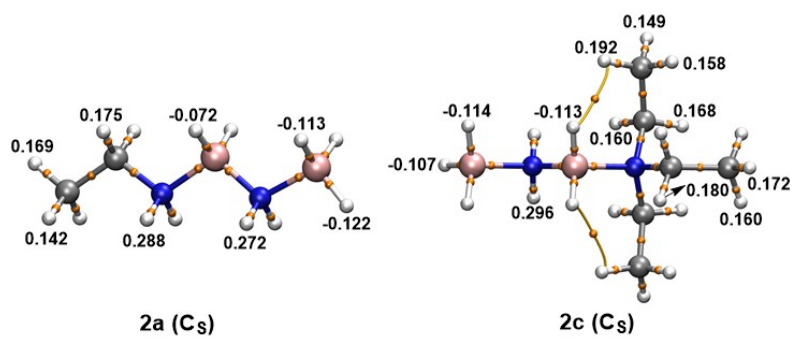

Figure S6e The NPA value and BCPs of mono-molecule 2a and 2c. (Because the C<sub>s</sub> symmetry of 2a and 2c, here the charge value of hydrogen atoms show only half. Bond critical point, orange; N, blue; B, pink; C, gray; H, light-gray).

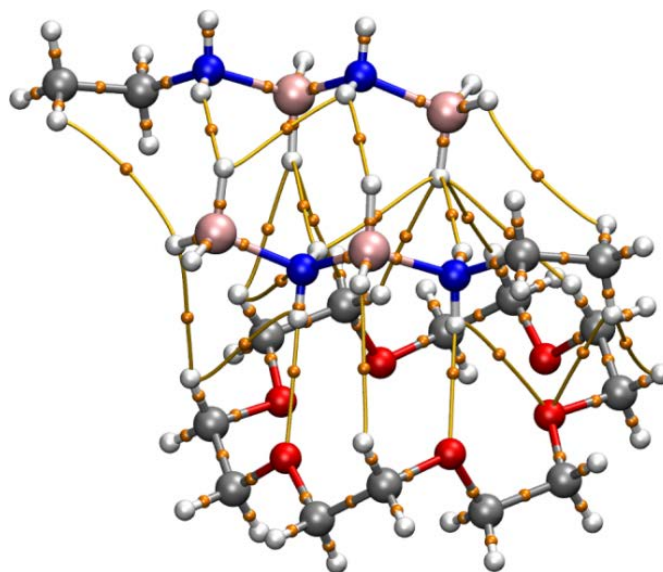

Figure S6f The BCPs of 2a intermolecular DHB interaction (Bond critical point, orange; N, blue; B, pink; C, gray; H, light-gray).

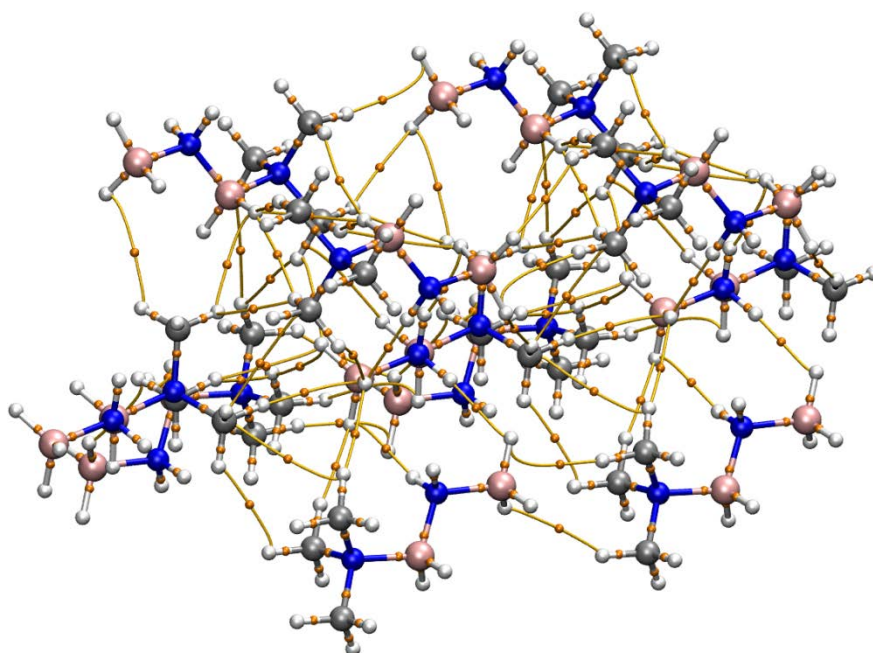

Figure S6g The BCPs of 2c intermolecular DHB interaction (Bond critical point, orange; N, blue; B, pink; C, gray; H, light-gray).

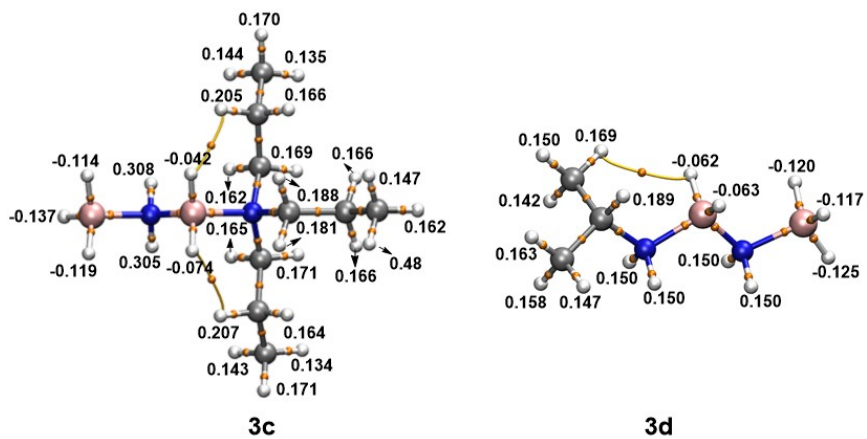

Figure S6h The NPA value and BCPs of mono-molecule 3c and 3d (Bond critical point, orange; N, blue; B, pink; C, gray; H, light-gray).

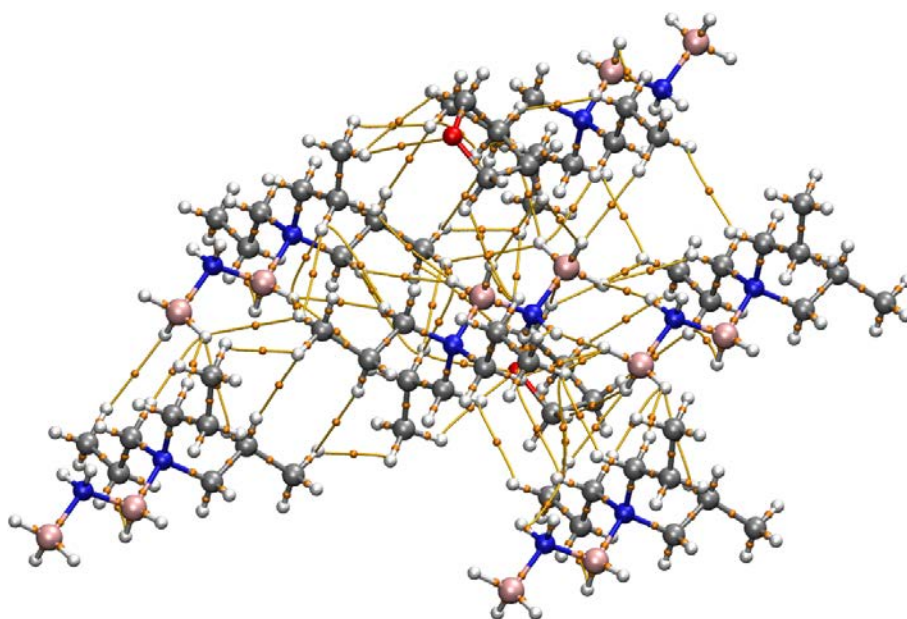

Figure S6i The BCPs of 3c intermolecular DHB interaction (Bond critical point, orange; N, blue; B, pink; C, gray; H, light-gray).

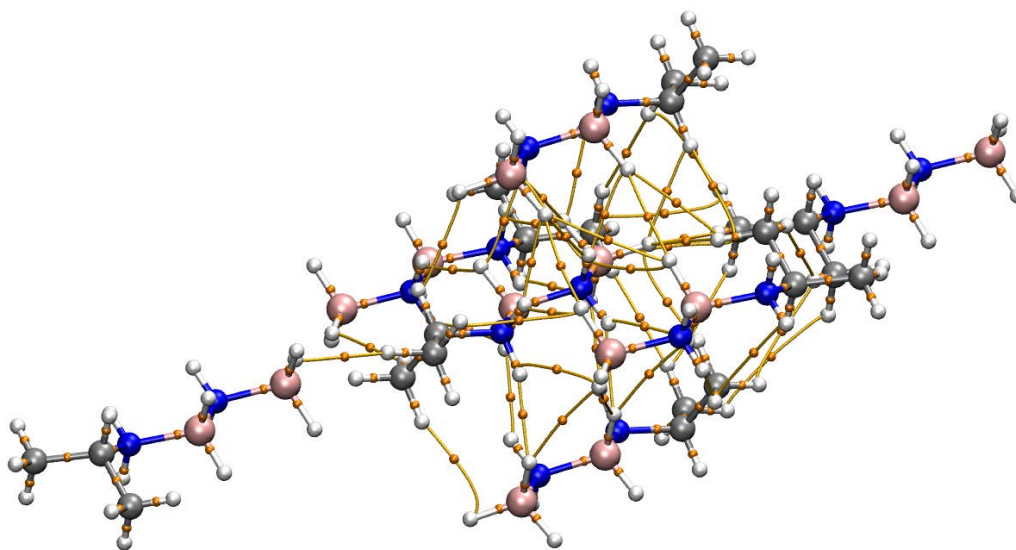

Figure S6j The BCPs of 3d intermolecular DHB interaction (Bond critical point, orange; N, blue; B, pink; C, gray; H, light-gray).

**Table S10** The energy difference ( $\Delta E$ ) of *anti* configuration and *gauch* configuration of the diborazanes.

|           | $E_{anti}$ (au) <sup>a</sup> | $E_{gauch}$ (au) <sup>a</sup> | $\Delta E$ (kcal/mol) <sup>b</sup> |
|-----------|------------------------------|-------------------------------|------------------------------------|
| <b>1a</b> | -204.5506285                 | -204.5550631                  | 2.78                               |
| <b>1b</b> | -243.8483385                 | -243.8537686                  | 3.41                               |
| <b>1c</b> | -283.1467220                 | -283.1459078                  | -0.51                              |
| <b>2a</b> | -243.8580352                 | -243.8637242                  | 3.57                               |
| <b>2b</b> | -322.4570357                 | -322.4634588                  | 4.03                               |
| <b>2c</b> | -401.0576854                 | -401.0517219                  | -3.74                              |
| <b>3a</b> | -283.1622115                 | -283.1665749                  | 2.74                               |
| <b>3b</b> | -401.0651287                 | -401.0715685                  | 4.04                               |
| <b>3c</b> | -518.9683671                 | -518.9639863                  | -2.75                              |
| <b>3d</b> | -283.1649786                 | -283.1692102                  | 2.66                               |
| <b>3e</b> | -401.0676821                 | -401.0735694                  | 3.69                               |
| <b>3f</b> | -440.3567103                 | -440.3514900                  | -3.28                              |
| <b>3g</b> | -479.6537497                 | -479.6442337                  | -5.97                              |

<sup>a</sup> The  $E_{anti}$  and  $E_{gauch}$  are the electronic energies.

<sup>b</sup>  $\Delta E = E_{anti} - E_{gauch}$ .

**Table S11** The melting points of the diborazanes and the isoelectronic analogs.

| diborazanes                                                                                  | mp (°C) | Isoelectronic analogs                                                                                           | mp (°C) |
|----------------------------------------------------------------------------------------------|---------|-----------------------------------------------------------------------------------------------------------------|---------|
| MeNH <sub>2</sub> BH <sub>2</sub> NH <sub>2</sub> BH <sub>3</sub> ( <b>1a</b> )              | 99      | CH <sub>3</sub> CH <sub>2</sub> CH <sub>2</sub> CH <sub>2</sub> CH <sub>3</sub>                                 | -130    |
| Me <sub>3</sub> NBH <sub>2</sub> NH <sub>2</sub> BH <sub>3</sub> ( <b>1c</b> )               | 119     | (CH <sub>3</sub> ) <sub>3</sub> CH <sub>2</sub> CH <sub>2</sub> CH <sub>2</sub> CH <sub>3</sub>                 | -124    |
| EtNH <sub>2</sub> BH <sub>2</sub> NH <sub>2</sub> BH <sub>3</sub> ( <b>2a</b> )              | 89      | CH <sub>3</sub> CH <sub>2</sub> CH <sub>2</sub> CH <sub>2</sub> CH <sub>2</sub> CH <sub>3</sub>                 | -94     |
| <sup>n</sup> PrNH <sub>2</sub> BH <sub>2</sub> NH <sub>2</sub> BH <sub>3</sub> ( <b>3a</b> ) | 91      | CH <sub>3</sub> CH <sub>2</sub> CH <sub>2</sub> CH <sub>2</sub> CH <sub>2</sub> CH <sub>2</sub> CH <sub>3</sub> | -91     |
| <sup>i</sup> PrNH <sub>2</sub> BH <sub>2</sub> NH <sub>2</sub> BH <sub>3</sub> ( <b>3d</b> ) | 102     | (CH <sub>3</sub> ) <sub>2</sub> CH <sub>2</sub> CH <sub>2</sub> CH <sub>2</sub> CH <sub>2</sub> CH <sub>3</sub> | -118    |

### 3. The optimized cartesian coordinates of all species

#### ADB

|   |           |           |           |
|---|-----------|-----------|-----------|
| 5 | 0.957279  | -0.441086 | -0.000003 |
| 1 | 1.520344  | -0.611932 | -1.037679 |
| 1 | 1.520277  | -0.611995 | 1.037698  |
| 5 | -0.957279 | -0.441085 | -0.000002 |
| 1 | -1.520273 | -0.612003 | 1.037699  |
| 1 | -1.520337 | -0.611935 | -1.037680 |
| 1 | 0.000002  | -1.379748 | -0.000066 |
| 7 | -0.000004 | 0.788341  | 0.000007  |
| 1 | 0.000012  | 1.360043  | 0.835884  |
| 1 | 0.000002  | 1.360038  | -0.835874 |

#### NH<sub>2</sub>Me

|   |           |           |           |
|---|-----------|-----------|-----------|
| 7 | 0.749448  | -0.000027 | -0.125717 |
| 1 | 1.139224  | -0.811656 | 0.346410  |
| 1 | 1.138482  | 0.812002  | 0.346397  |
| 6 | -0.703808 | -0.000057 | 0.017913  |
| 1 | -1.111134 | 0.880816  | -0.485709 |
| 1 | -1.111540 | -0.879413 | -0.487793 |
| 1 | -1.078319 | -0.001214 | 1.053234  |

#### TS1

|   |           |           |           |
|---|-----------|-----------|-----------|
| 7 | -1.490595 | -0.606193 | -0.051027 |
| 1 | -1.609882 | -1.110754 | -0.926926 |
| 1 | -1.620220 | -1.283168 | 0.698173  |
| 6 | -2.493263 | 0.457484  | 0.054745  |
| 1 | -2.365373 | 0.961948  | 1.014676  |
| 1 | -2.303428 | 1.192543  | -0.730973 |
| 1 | -3.528031 | 0.104583  | -0.028093 |
| 5 | 0.456320  | 0.511129  | -0.071830 |
| 1 | 0.186739  | 0.883397  | -1.171498 |
| 1 | 0.129033  | 1.066072  | 0.930198  |
| 5 | 2.623599  | 0.423005  | 0.003274  |
| 1 | 3.201757  | 0.415001  | 1.058373  |
| 1 | 3.275315  | 0.228498  | -0.988956 |
| 1 | 1.983578  | 1.478067  | -0.115606 |
| 7 | 1.406711  | -0.661065 | 0.058908  |
| 1 | 1.371433  | -1.167386 | 0.936326  |
| 1 | 1.426250  | -1.313574 | -0.716547 |

#### P1

|   |           |           |           |
|---|-----------|-----------|-----------|
| 7 | -1.287721 | -0.502497 | 0.000253  |
| 1 | -1.291941 | -1.113527 | -0.818355 |
| 1 | -1.291731 | -1.112682 | 0.819490  |
| 6 | -2.511777 | 0.332365  | -0.000013 |
| 1 | -2.483708 | 0.967877  | 0.884734  |
| 1 | -2.484595 | 0.966052  | -0.886099 |
| 1 | -3.413765 | -0.282208 | 0.001059  |
| 5 | 0.078713  | 0.441305  | -0.000266 |
| 1 | 0.000832  | 1.073254  | -1.021160 |
| 1 | 0.001196  | 1.073653  | 1.020406  |
| 5 | 2.738329  | 0.360482  | 0.000302  |
| 1 | 3.606156  | -0.490804 | -0.000171 |
| 1 | 2.725998  | 1.024385  | -1.012552 |

|   |          |           |           |
|---|----------|-----------|-----------|
| 1 | 2.725718 | 1.023193  | 1.013886  |
| 7 | 1.310679 | -0.489832 | -0.000306 |
| 1 | 1.365165 | -1.093260 | 0.819343  |
| 1 | 1.365416 | -1.092759 | -0.820306 |

#### NHMe<sub>2</sub>

|   |           |           |           |
|---|-----------|-----------|-----------|
| 7 | -0.000001 | 0.571923  | -0.151237 |
| 1 | -0.000006 | 1.326724  | 0.529483  |
| 6 | 1.202907  | -0.224266 | 0.020611  |
| 1 | 1.258311  | -0.965336 | -0.784124 |
| 1 | 2.085436  | 0.416516  | -0.054585 |
| 1 | 1.246722  | -0.770669 | 0.979634  |
| 6 | -1.202908 | -0.224264 | 0.020610  |
| 1 | -2.085455 | 0.416453  | -0.054939 |
| 1 | -1.258121 | -0.965573 | -0.783918 |
| 1 | -1.246879 | -0.770399 | 0.979782  |

#### TS2

|   |           |           |           |
|---|-----------|-----------|-----------|
| 5 | 0.821330  | 0.672778  | 0.162200  |
| 1 | 0.698908  | 1.595129  | -0.582382 |
| 1 | 0.456296  | 0.656674  | 1.298285  |
| 5 | 2.927485  | 0.236394  | 0.217168  |
| 1 | 3.407656  | -0.400683 | 1.116977  |
| 1 | 3.636447  | 0.513752  | -0.713307 |
| 1 | 2.411483  | 1.271544  | 0.670356  |
| 7 | 1.601302  | -0.531125 | -0.332548 |
| 1 | 1.427990  | -1.407788 | 0.146542  |
| 1 | 1.617103  | -0.679202 | -1.335179 |
| 7 | -1.239007 | -0.026575 | -0.391280 |
| 1 | -1.335512 | -0.136049 | -1.398668 |
| 6 | -1.550420 | -1.282655 | 0.276667  |
| 1 | -2.612783 | -1.560168 | 0.210847  |
| 1 | -0.954017 | -2.090953 | -0.156892 |
| 1 | -1.284610 | -1.186976 | 1.335047  |
| 6 | -2.092439 | 1.066954  | 0.059216  |
| 1 | -3.163955 | 0.854310  | -0.065466 |
| 1 | -1.892245 | 1.247899  | 1.119586  |
| 1 | -1.835750 | 1.974753  | -0.491083 |

#### P2

|   |           |           |           |
|---|-----------|-----------|-----------|
| 5 | -0.378763 | -0.618700 | 0.184486  |
| 1 | -0.484063 | -1.667718 | -0.395438 |
| 1 | -0.260988 | -0.684982 | 1.382394  |
| 5 | -3.012088 | -0.257653 | 0.134489  |
| 1 | -3.785688 | 0.638672  | -0.141901 |
| 1 | -3.140679 | -1.230088 | -0.576064 |
| 1 | -2.996682 | -0.521525 | 1.316389  |
| 7 | -1.508132 | 0.356982  | -0.214328 |
| 1 | -1.466602 | 1.246601  | 0.280215  |
| 1 | -1.540737 | 0.569563  | -1.211014 |
| 7 | 1.081382  | -0.015846 | -0.328433 |
| 1 | 1.054745  | 0.025852  | -1.349448 |
| 6 | 1.367749  | 1.337888  | 0.187804  |
| 1 | 2.372991  | 1.660933  | -0.096823 |
| 1 | 0.634579  | 2.041092  | -0.208665 |
| 1 | 1.281452  | 1.303676  | 1.275888  |
| 6 | 2.147383  | -0.967717 | 0.054476  |
| 1 | 3.118885  | -0.630172 | -0.316202 |

|   |          |           |           |
|---|----------|-----------|-----------|
| 1 | 2.163309 | -1.030855 | 1.143652  |
| 1 | 1.900191 | -1.948267 | -0.352213 |

### NMe<sub>3</sub>

|   |           |           |           |
|---|-----------|-----------|-----------|
| 7 | -0.000257 | 0.000002  | -0.390324 |
| 6 | 0.692405  | 1.190521  | 0.063396  |
| 1 | 1.717369  | 1.189963  | -0.319654 |
| 1 | 0.184298  | 2.081594  | -0.317621 |
| 1 | 0.736113  | 1.262982  | 1.167492  |
| 6 | 0.685221  | -1.194669 | 0.063395  |
| 1 | 0.171707  | -2.082662 | -0.317566 |
| 1 | 1.710149  | -1.200327 | -0.319708 |
| 1 | 0.728541  | -1.267360 | 1.167491  |
| 6 | -1.377551 | 0.004147  | 0.063528  |
| 1 | -1.889546 | 0.892447  | -0.318807 |
| 1 | -1.894913 | -0.881012 | -0.318870 |
| 1 | -1.462366 | 0.004365  | 1.167601  |

### TS3

|   |           |           |           |
|---|-----------|-----------|-----------|
| 5 | -1.056831 | 0.749615  | 0.000292  |
| 1 | -0.845902 | 1.256105  | 1.059859  |
| 1 | -0.846014 | 1.256300  | -1.059202 |
| 5 | -3.148150 | 0.247990  | 0.000043  |
| 1 | -3.733612 | 0.041354  | -1.029700 |
| 1 | -3.734106 | 0.040732  | 1.029378  |
| 1 | -2.703290 | 1.407464  | 0.000487  |
| 7 | -1.755291 | -0.597752 | 0.000096  |
| 1 | -1.642993 | -1.166784 | -0.831593 |
| 1 | -1.643173 | -1.167024 | 0.831648  |
| 7 | 1.057509  | 0.015526  | 0.000028  |
| 6 | 1.319494  | -0.760683 | -1.201809 |
| 1 | 0.727366  | -1.681538 | -1.180656 |
| 1 | 1.026442  | -0.176135 | -2.078769 |
| 1 | 2.382086  | -1.038116 | -1.297671 |
| 6 | 1.321501  | -0.755954 | 1.204470  |
| 1 | 1.030750  | -0.167653 | 2.079652  |
| 1 | 0.728574  | -1.676379 | 1.188331  |
| 1 | 2.384088  | -1.033800 | 1.299148  |
| 6 | 1.819422  | 1.256737  | -0.003014 |
| 1 | 1.555009  | 1.838318  | -0.890069 |
| 1 | 1.555804  | 1.841980  | 0.881871  |
| 1 | 2.905843  | 1.072126  | -0.003146 |

### P3

|   |           |           |           |
|---|-----------|-----------|-----------|
| 5 | -0.581412 | 0.712281  | 0.000857  |
| 1 | -0.611145 | 1.349347  | 1.022574  |
| 1 | -0.611510 | 1.351113  | -1.019719 |
| 5 | -3.199230 | 0.268274  | -0.000122 |
| 1 | -3.278385 | 0.926276  | -1.013709 |
| 1 | -3.942600 | -0.693776 | 0.000157  |
| 1 | -3.278579 | 0.927019  | 1.012956  |
| 7 | -1.668343 | -0.382992 | 0.000176  |
| 1 | -1.648152 | -0.986457 | -0.820470 |
| 1 | -1.648489 | -0.986941 | 0.820473  |
| 7 | 0.943932  | 0.027452  | -0.000006 |
| 6 | 1.160538  | -0.793217 | -1.210526 |
| 1 | 0.479818  | -1.646438 | -1.196033 |
| 1 | 0.951767  | -0.180040 | -2.088531 |

|   |          |           |           |
|---|----------|-----------|-----------|
| 1 | 2.192254 | -1.159265 | -1.242588 |
| 6 | 1.160772 | -0.795830 | 1.208681  |
| 1 | 0.952222 | -0.184542 | 2.088061  |
| 1 | 0.480002 | -1.648980 | 1.192481  |
| 1 | 2.192484 | -1.161975 | 1.239743  |
| 6 | 1.905193 | 1.153574  | 0.001108  |
| 1 | 1.726787 | 1.762361  | -0.885969 |
| 1 | 1.727348 | 1.760119  | 0.889830  |
| 1 | 2.931249 | 0.771010  | 0.000305  |

### NH<sub>2</sub>Et

|   |           |           |           |
|---|-----------|-----------|-----------|
| 7 | 1.293614  | -0.185219 | 0.000009  |
| 1 | 1.312067  | -0.799370 | -0.812310 |
| 1 | 1.312007  | -0.799482 | 0.812245  |
| 6 | 0.045401  | 0.575899  | 0.000006  |
| 1 | 0.058303  | 1.233118  | 0.876325  |
| 1 | 0.058315  | 1.233114  | -0.876314 |
| 6 | -1.232488 | -0.262919 | -0.000005 |
| 1 | -2.128649 | 0.365958  | -0.000013 |
| 1 | -1.272400 | -0.907341 | -0.885235 |
| 1 | -1.272417 | -0.907339 | 0.885226  |

### TS4

|   |           |           |           |
|---|-----------|-----------|-----------|
| 5 | 1.296929  | 0.790470  | 0.283808  |
| 1 | 1.480324  | 1.785422  | -0.342673 |
| 1 | 0.961973  | 0.755740  | 1.427451  |
| 5 | 3.172810  | -0.303784 | 0.195296  |
| 1 | 3.425739  | -1.176607 | 0.983899  |
| 1 | 3.919853  | -0.163621 | -0.737061 |
| 1 | 3.038598  | 0.774610  | 0.792012  |
| 7 | 1.659086  | -0.525942 | -0.370795 |
| 1 | 1.215296  | -1.353483 | 0.012086  |
| 1 | 1.614167  | -0.546836 | -1.383393 |
| 7 | -0.881632 | 0.808669  | -0.264992 |
| 1 | -1.180661 | 1.586652  | 0.321006  |
| 1 | -1.110063 | 1.065843  | -1.224349 |
| 6 | -1.586596 | -0.414970 | 0.122781  |
| 1 | -1.253803 | -1.212908 | -0.551662 |
| 1 | -1.236403 | -0.682255 | 1.126620  |
| 6 | -3.108611 | -0.315245 | 0.100991  |
| 1 | -3.569799 | -1.260351 | 0.402842  |
| 1 | -3.455177 | 0.463623  | 0.788148  |
| 1 | -3.469672 | -0.067059 | -0.902572 |

### P4

|   |           |           |           |
|---|-----------|-----------|-----------|
| 5 | 0.836021  | 0.843932  | 0.264408  |
| 1 | 1.237273  | 1.851586  | -0.254638 |
| 1 | 0.776846  | 0.856401  | 1.466851  |
| 5 | 3.218886  | -0.323585 | 0.083961  |
| 1 | 3.666507  | -1.386419 | -0.300686 |
| 1 | 3.637257  | 0.622607  | -0.546133 |
| 1 | 3.305041  | -0.181001 | 1.283731  |
| 7 | 1.593804  | -0.400197 | -0.248995 |
| 1 | 1.277291  | -1.269487 | 0.177891  |
| 1 | 1.538914  | -0.525664 | -1.259333 |
| 7 | -0.750694 | 0.746374  | -0.216930 |
| 1 | -1.183661 | 1.604320  | 0.132286  |
| 1 | -0.819070 | 0.799594  | -1.236160 |



|   |           |           |           |
|---|-----------|-----------|-----------|
| 6 | -1.516309 | -0.425116 | 0.277442  |
| 1 | -1.059435 | -1.314218 | -0.164585 |
| 1 | -1.346005 | -0.466877 | 1.356128  |
| 6 | -2.996306 | -0.345559 | -0.061179 |
| 1 | -3.517470 | -1.228338 | 0.316979  |
| 1 | -3.458722 | 0.536519  | 0.393054  |
| 1 | -3.155391 | -0.299951 | -1.143329 |

**NH<sub>2</sub>**

|   |           |           |           |
|---|-----------|-----------|-----------|
| 7 | -0.079891 | -0.701180 | 0.197634  |
| 1 | -0.109341 | -0.695946 | 1.216598  |
| 6 | 1.307870  | -0.620927 | -0.242393 |
| 1 | 1.825562  | -1.507744 | 0.140287  |
| 1 | 1.309274  | -0.708929 | -1.336169 |
| 6 | 2.075791  | 0.637003  | 0.172633  |
| 1 | 3.120649  | 0.578254  | -0.147935 |
| 1 | 1.642475  | 1.539540  | -0.268366 |
| 1 | 2.064340  | 0.755180  | 1.262280  |
| 6 | -0.935556 | 0.365969  | -0.304767 |
| 1 | -0.622962 | 1.373866  | 0.019521  |
| 1 | -0.861219 | 0.354241  | -1.399879 |
| 6 | -2.378414 | 0.124232  | 0.115639  |
| 1 | -2.470998 | 0.137561  | 1.207519  |
| 1 | -3.040974 | 0.897139  | -0.284126 |
| 1 | -2.715710 | -0.852574 | -0.239837 |

**TS5**

|   |           |           |           |
|---|-----------|-----------|-----------|
| 5 | 1.318301  | -0.694209 | 0.517013  |
| 1 | 1.158311  | 0.023606  | 1.455727  |
| 1 | 0.976442  | -1.833716 | 0.472059  |
| 5 | 3.471594  | -0.717960 | 0.200964  |
| 1 | 4.019406  | -1.579627 | -0.435145 |
| 1 | 4.131080  | 0.233082  | 0.529754  |
| 1 | 2.924178  | -1.212574 | 1.196501  |
| 7 | 2.170118  | -0.189256 | -0.629698 |
| 1 | 2.052094  | -0.671408 | -1.513772 |
| 1 | 2.180769  | 0.812801  | -0.784284 |
| 7 | -0.713995 | -0.051858 | -0.239051 |
| 1 | -0.733023 | 0.040574  | -1.256046 |
| 6 | -1.598113 | -1.155128 | 0.153518  |
| 1 | -1.212284 | -2.060035 | -0.325910 |
| 1 | -1.465270 | -1.298205 | 1.232481  |
| 6 | -3.075903 | -0.973059 | -0.185760 |
| 1 | -3.631447 | -1.884528 | 0.052674  |
| 1 | -3.530643 | -0.153092 | 0.376605  |
| 1 | -3.210176 | -0.768992 | -1.254251 |
| 6 | -1.078321 | 1.236942  | 0.355449  |
| 1 | -2.098944 | 1.541852  | 0.082138  |
| 1 | -1.059610 | 1.101785  | 1.443479  |
| 6 | -0.096157 | 2.328236  | -0.046257 |
| 1 | -0.000525 | 2.388463  | -1.137295 |
| 1 | -0.441942 | 3.302885  | 0.307603  |
| 1 | 0.890210  | 2.143830  | 0.387324  |

**P5**

|   |          |           |          |
|---|----------|-----------|----------|
| 5 | 0.747329 | -0.899413 | 0.417323 |
| 1 | 0.902551 | -0.402330 | 1.501622 |
| 1 | 0.510862 | -2.080879 | 0.437750 |

|   |           |           |           |
|---|-----------|-----------|-----------|
| 5 | 3.379747  | -0.494273 | 0.228782  |
| 1 | 4.227707  | -0.456985 | -0.641335 |
| 1 | 3.309527  | 0.544382  | 0.861125  |
| 1 | 3.467209  | -1.468564 | 0.942884  |
| 7 | 1.934862  | -0.618193 | -0.555176 |
| 1 | 2.028089  | -1.370718 | -1.234783 |
| 1 | 1.858095  | 0.242188  | -1.094153 |
| 7 | -0.624336 | -0.169259 | -0.169288 |
| 1 | -0.585032 | -0.168705 | -1.193199 |
| 6 | -1.812064 | -0.980039 | 0.229558  |
| 1 | -1.653610 | -1.974354 | -0.190990 |
| 1 | -1.756037 | -1.079695 | 1.317678  |
| 6 | -3.151648 | -0.410985 | -0.215831 |
| 1 | -3.931913 | -1.154030 | -0.032625 |
| 1 | -3.426402 | 0.495629  | 0.327667  |
| 1 | -3.153951 | -0.187334 | -1.288684 |
| 6 | -0.743046 | 1.248534  | 0.282633  |
| 1 | -1.644054 | 1.685247  | -0.158525 |
| 1 | -0.875405 | 1.201091  | 1.367252  |
| 6 | 0.473471  | 2.090551  | -0.066591 |
| 1 | 0.632464  | 2.131565  | -1.151003 |
| 1 | 0.300231  | 3.115904  | 0.270184  |
| 1 | 1.380328  | 1.719805  | 0.421248  |

**NEt<sub>3</sub>**

|   |           |           |           |
|---|-----------|-----------|-----------|
| 7 | 0.090744  | 0.011841  | 0.377461  |
| 6 | 1.495421  | 0.210941  | 0.714557  |
| 1 | 1.595897  | 1.225459  | 1.117801  |
| 1 | 1.741331  | -0.474059 | 1.535592  |
| 6 | 2.493853  | 0.009709  | -0.430557 |
| 1 | 3.510875  | 0.243443  | -0.101005 |
| 1 | 2.487573  | -1.025197 | -0.785950 |
| 1 | 2.258507  | 0.658694  | -1.281268 |
| 6 | -0.198487 | -1.343156 | -0.069985 |
| 1 | 0.182223  | -1.534770 | -1.091286 |
| 1 | 0.335027  | -2.029461 | 0.599500  |
| 6 | -1.687672 | -1.664536 | -0.028880 |
| 1 | -2.248635 | -1.057973 | -0.747153 |
| 1 | -1.858504 | -2.715590 | -0.280288 |
| 1 | -2.087929 | -1.470070 | 0.970216  |
| 6 | -0.456658 | 1.049723  | -0.499519 |
| 1 | 0.312900  | 1.809842  | -0.682770 |
| 1 | -0.706273 | 0.631847  | -1.487967 |
| 6 | -1.679891 | 1.729447  | 0.110577  |
| 1 | -1.413890 | 2.176408  | 1.072854  |
| 1 | -2.061815 | 2.517125  | -0.547641 |
| 1 | -2.481899 | 1.008651  | 0.289979  |

**TS6**

|   |           |           |           |
|---|-----------|-----------|-----------|
| 5 | -1.452493 | -0.239918 | -0.991049 |
| 1 | -1.365260 | 0.797531  | -1.571446 |
| 1 | -1.060386 | -1.280999 | -1.415255 |
| 5 | -3.593596 | -0.517777 | -0.673464 |
| 1 | -4.071151 | -1.592510 | -0.419371 |
| 1 | -4.308984 | 0.444510  | -0.573436 |
| 1 | -3.073487 | -0.541417 | -1.795906 |
| 7 | -2.280638 | -0.286925 | 0.274476  |
| 1 | -2.107590 | -1.073730 | 0.891261  |

|   |           |           |           |
|---|-----------|-----------|-----------|
| 1 | -2.339348 | 0.566588  | 0.819175  |
| 7 | 0.596415  | 0.170997  | -0.083957 |
| 6 | 1.472332  | -0.415870 | -1.111571 |
| 1 | 1.192006  | -1.465902 | -1.228036 |
| 1 | 1.208964  | 0.071931  | -2.056849 |
| 6 | 2.975120  | -0.301230 | -0.857094 |
| 1 | 3.521912  | -0.789371 | -1.668713 |
| 1 | 3.307660  | 0.739856  | -0.812978 |
| 1 | 3.265558  | -0.790622 | 0.078652  |
| 6 | 0.797868  | 1.626115  | -0.007514 |
| 1 | 1.776129  | 1.852019  | 0.448266  |
| 1 | 0.827309  | 1.998002  | -1.037499 |
| 6 | -0.288837 | 2.382803  | 0.748740  |
| 1 | -0.399586 | 2.040076  | 1.781965  |
| 1 | -0.023865 | 3.443038  | 0.789852  |
| 1 | -1.250474 | 2.304131  | 0.235429  |
| 6 | 0.755733  | -0.452638 | 1.235395  |
| 1 | 1.705245  | -0.141455 | 1.704439  |
| 1 | -0.041904 | -0.065253 | 1.878588  |
| 6 | 0.671904  | -1.975161 | 1.210038  |
| 1 | 1.560737  | -2.427025 | 0.761169  |
| 1 | 0.589624  | -2.355850 | 2.231631  |
| 1 | -0.197831 | -2.317701 | 0.640021  |

**P6**

|   |           |           |           |
|---|-----------|-----------|-----------|
| 5 | -0.901369 | -0.298036 | -0.950399 |
| 1 | -1.134873 | 0.666312  | -1.630333 |
| 1 | -0.615649 | -1.283416 | -1.581720 |
| 5 | -3.538719 | -0.344721 | -0.672595 |
| 1 | -4.359313 | -0.833274 | 0.079323  |
| 1 | -3.622110 | 0.868278  | -0.736917 |
| 1 | -3.515661 | -0.870315 | -1.763515 |
| 7 | -2.068877 | -0.632366 | 0.022189  |
| 1 | -2.053915 | -1.613028 | 0.297673  |
| 1 | -2.093601 | -0.095655 | 0.886065  |
| 7 | 0.486359  | 0.143679  | -0.119765 |
| 6 | 1.600480  | -0.066456 | -1.102518 |
| 1 | 1.572317  | -1.118258 | -1.387725 |
| 1 | 1.315445  | 0.503919  | -1.990851 |
| 6 | 2.992664  | 0.323348  | -0.624641 |
| 1 | 3.704182  | 0.096270  | -1.423030 |
| 1 | 3.081695  | 1.389357  | -0.402258 |
| 1 | 3.302202  | -0.244186 | 0.258256  |
| 6 | 0.425621  | 1.604415  | 0.223861  |
| 1 | 1.308062  | 1.845654  | 0.827316  |
| 1 | 0.503782  | 2.138308  | -0.726581 |
| 6 | -0.835627 | 2.058957  | 0.943848  |
| 1 | -0.967394 | 1.571195  | 1.915351  |
| 1 | -0.741038 | 3.130461  | 1.140987  |
| 1 | -1.728977 | 1.909875  | 0.329762  |
| 6 | 0.710444  | -0.647525 | 1.127019  |
| 1 | 1.562381  | -0.213103 | 1.662973  |
| 1 | -0.168230 | -0.499762 | 1.757850  |
| 6 | 0.932805  | -2.134173 | 0.891067  |
| 1 | 1.907600  | -2.334792 | 0.438686  |
| 1 | 0.901447  | -2.653511 | 1.852247  |
| 1 | 0.161394  | -2.557135 | 0.242626  |

**"PrNH<sub>2</sub>**

|   |           |           |           |
|---|-----------|-----------|-----------|
| 7 | -1.952450 | 0.024371  | -0.000004 |
| 1 | -2.079097 | 0.624827  | -0.812688 |
| 1 | -2.079133 | 0.624721  | 0.812752  |
| 6 | -0.592713 | -0.509045 | -0.000009 |
| 1 | -0.487901 | -1.160340 | 0.876868  |
| 1 | -0.487899 | -1.160330 | -0.876893 |
| 6 | 0.532590  | 0.526823  | 0.000001  |
| 1 | 0.420926  | 1.175390  | -0.879513 |
| 1 | 0.420918  | 1.175381  | 0.879519  |
| 6 | 1.916943  | -0.115998 | 0.000003  |
| 1 | 2.053825  | -0.748273 | -0.883753 |
| 1 | 2.710888  | 0.635833  | 0.000150  |
| 1 | 2.053708  | -0.748492 | 0.883621  |

**TS7**

|   |           |           |           |
|---|-----------|-----------|-----------|
| 5 | 1.687921  | 0.513506  | -0.083280 |
| 1 | 1.386567  | 0.819047  | -1.194821 |
| 1 | 1.312184  | 1.074511  | 0.897806  |
| 5 | 3.859062  | 0.627064  | -0.022240 |
| 1 | 4.447088  | 0.705754  | 1.024511  |
| 1 | 4.515847  | 0.453191  | -1.015171 |
| 1 | 3.129001  | 1.617315  | -0.169684 |
| 7 | 2.743426  | -0.558271 | 0.086780  |
| 1 | 2.758358  | -1.029085 | 0.984376  |
| 1 | 2.817628  | -1.238144 | -0.661401 |
| 7 | -0.147442 | -0.784938 | -0.020390 |
| 1 | -0.216730 | -1.314587 | -0.888768 |
| 1 | -0.217739 | -1.461904 | 0.738661  |
| 6 | -1.259480 | 0.168441  | 0.063828  |
| 1 | -1.164883 | 0.693954  | 1.020688  |
| 1 | -1.100967 | 0.920901  | -0.717441 |
| 6 | -2.650757 | -0.445463 | -0.067551 |
| 1 | -2.723954 | -0.969765 | -1.029611 |
| 1 | -2.786571 | -1.204991 | 0.713597  |
| 6 | -3.751085 | 0.608116  | 0.033728  |
| 1 | -3.640440 | 1.363712  | -0.750716 |
| 1 | -4.742848 | 0.160273  | -0.068374 |
| 1 | -3.711416 | 1.122880  | 0.999190  |

**P7**

|   |           |           |           |
|---|-----------|-----------|-----------|
| 5 | 1.340656  | -0.472816 | -0.000056 |
| 1 | 1.264818  | -1.105647 | 1.020495  |
| 1 | 1.264622  | -1.105502 | -1.020680 |
| 5 | 4.003753  | -0.392304 | -0.000027 |
| 1 | 4.871511  | 0.459489  | -0.000466 |
| 1 | 3.993269  | -1.055609 | 1.013426  |
| 1 | 3.992814  | -1.056411 | -1.012930 |
| 7 | 2.576528  | 0.455452  | -0.000068 |
| 1 | 2.629583  | 1.059299  | -0.819573 |
| 1 | 2.629534  | 1.059351  | 0.819404  |
| 7 | -0.019403 | 0.476155  | 0.000144  |
| 1 | -0.022768 | 1.089342  | 0.818686  |
| 1 | -0.022889 | 1.089667  | -0.818156 |
| 6 | -1.263317 | -0.336491 | 0.000111  |
| 1 | -1.210686 | -0.982489 | -0.880424 |
| 1 | -1.210852 | -0.982306 | 0.880794  |
| 6 | -2.529984 | 0.507733  | -0.000097 |

|   |           |           |           |
|---|-----------|-----------|-----------|
| 1 | -2.535263 | 1.161881  | 0.881283  |
| 1 | -2.535139 | 1.161603  | -0.881685 |
| 6 | -3.779345 | -0.370894 | -0.000046 |
| 1 | -3.804327 | -1.013999 | 0.884850  |
| 1 | -4.686156 | 0.238008  | -0.000298 |
| 1 | -3.804112 | -1.014412 | -0.884647 |

**"Pr<sub>2</sub>NH**

|   |           |           |           |
|---|-----------|-----------|-----------|
| 7 | -0.047766 | 1.010977  | -0.092293 |
| 1 | -0.059674 | 1.245058  | -1.084032 |
| 6 | 1.322210  | 0.735644  | 0.319075  |
| 1 | 1.910445  | 1.646221  | 0.146043  |
| 1 | 1.316093  | 0.573614  | 1.405876  |
| 6 | 2.021692  | -0.445728 | -0.361954 |
| 1 | 1.485933  | -1.375947 | -0.138574 |
| 1 | 1.972259  | -0.309516 | -1.451035 |
| 6 | -0.985239 | -0.076537 | 0.150015  |
| 1 | -0.755070 | -0.998204 | -0.414998 |
| 1 | -0.915796 | -0.340883 | 1.214558  |
| 6 | -2.410523 | 0.357968  | -0.170655 |
| 1 | -2.462022 | 0.662128  | -1.224985 |
| 1 | -2.643333 | 1.248654  | 0.422332  |
| 6 | -3.426577 | -0.749390 | 0.094051  |
| 1 | -4.442981 | -0.425517 | -0.145990 |
| 1 | -3.206780 | -1.637749 | -0.507792 |
| 1 | -3.411257 | -1.050143 | 1.147097  |
| 6 | 3.476664  | -0.573222 | 0.082070  |
| 1 | 3.974250  | -1.417669 | -0.402618 |
| 1 | 4.040990  | 0.333643  | -0.160652 |
| 1 | 3.541933  | -0.722941 | 1.165216  |

**TS8**

|   |           |           |           |
|---|-----------|-----------|-----------|
| 5 | 1.315319  | -1.425308 | 0.515561  |
| 1 | 1.404369  | -0.672034 | 1.435783  |
| 1 | 0.579022  | -2.360021 | 0.475777  |
| 5 | 3.318841  | -2.244177 | 0.284006  |
| 1 | 3.540808  | -3.262186 | -0.317590 |
| 1 | 4.265121  | -1.585186 | 0.627384  |
| 1 | 2.596410  | -2.481310 | 1.262189  |
| 7 | 2.325451  | -1.304295 | -0.606910 |
| 1 | 2.062855  | -1.738935 | -1.484506 |
| 1 | 2.707426  | -0.381281 | -0.781852 |
| 7 | -0.319243 | -0.103211 | -0.322617 |
| 1 | -0.297066 | -0.068696 | -1.342822 |
| 6 | -1.550844 | -0.776094 | 0.103596  |
| 1 | -1.544653 | -1.776622 | -0.343937 |
| 1 | -1.474632 | -0.925336 | 1.188772  |
| 6 | -2.862466 | -0.069399 | -0.239541 |
| 1 | -2.925518 | 0.888680  | 0.288359  |
| 1 | -2.879401 | 0.160741  | -1.313771 |
| 6 | -0.183294 | 1.260153  | 0.194687  |
| 1 | -1.001762 | 1.914574  | -0.144634 |
| 1 | -0.253076 | 1.197740  | 1.288430  |
| 6 | 1.149711  | 1.888543  | -0.195790 |
| 1 | 1.295682  | 1.785095  | -1.280955 |
| 1 | 1.959461  | 1.340981  | 0.298270  |
| 6 | 1.213540  | 3.363612  | 0.191425  |
| 1 | 2.179258  | 3.802131  | -0.072375 |

|   |           |           |           |
|---|-----------|-----------|-----------|
| 1 | 0.431546  | 3.937133  | -0.316714 |
| 1 | 1.072832  | 3.487765  | 1.269956  |
| 6 | -4.067600 | -0.932206 | 0.128350  |
| 1 | -5.007555 | -0.424906 | -0.103953 |
| 1 | -4.052280 | -1.881161 | -0.417608 |
| 1 | -4.067374 | -1.164858 | 1.198286  |

**P8**

|   |           |           |           |
|---|-----------|-----------|-----------|
| 5 | 0.771795  | -1.381068 | 0.442823  |
| 1 | 1.075326  | -0.893317 | 1.499857  |
| 1 | 0.194379  | -2.435866 | 0.524735  |
| 5 | 3.402652  | -1.798198 | 0.264544  |
| 1 | 4.218197  | -2.068905 | -0.595282 |
| 1 | 3.653181  | -0.752211 | 0.836482  |
| 1 | 3.194993  | -2.710628 | 1.033729  |
| 7 | 1.984397  | -1.523810 | -0.529802 |
| 1 | 1.843232  | -2.305502 | -1.166796 |
| 1 | 2.169572  | -0.710793 | -1.114121 |
| 7 | -0.323268 | -0.308879 | -0.198215 |
| 1 | -0.299188 | -0.386233 | -1.219529 |
| 6 | -1.694368 | -0.696552 | 0.242346  |
| 1 | -1.846594 | -1.722105 | -0.103215 |
| 1 | -1.664754 | -0.729470 | 1.336729  |
| 6 | -2.818896 | 0.203234  | -0.257106 |
| 1 | -2.760081 | 1.191875  | 0.209128  |
| 1 | -2.716867 | 0.353629  | -1.340847 |
| 6 | -0.003360 | 1.104793  | 0.158644  |
| 1 | -0.732729 | 1.767443  | -0.320246 |
| 1 | -0.132533 | 1.175279  | 1.243643  |
| 6 | 1.406421  | 1.530245  | -0.226369 |
| 1 | 1.546855  | 1.401960  | -1.309582 |
| 1 | 2.142339  | 0.901119  | 0.286774  |
| 6 | 1.637232  | 2.995600  | 0.138970  |
| 1 | 2.648961  | 3.304597  | -0.132550 |
| 1 | 0.931030  | 3.654867  | -0.376911 |
| 1 | 1.520138  | 3.149198  | 1.216260  |
| 6 | -4.178138 | -0.422388 | 0.052028  |
| 1 | -4.992277 | 0.223842  | -0.284325 |
| 1 | -4.288014 | -1.391647 | -0.443994 |
| 1 | -4.298646 | -0.581577 | 1.128262  |

**"Pr<sub>3</sub>N**

|   |           |           |           |
|---|-----------|-----------|-----------|
| 7 | 0.000373  | -0.000143 | 0.175220  |
| 6 | -0.998585 | -0.965813 | -0.275241 |
| 1 | -1.972677 | -0.635697 | 0.099793  |
| 1 | -1.072023 | -0.977851 | -1.383593 |
| 6 | 1.336746  | -0.381545 | -0.273904 |
| 1 | 1.537704  | -1.390814 | 0.099429  |
| 1 | 1.386019  | -0.436217 | -1.382317 |
| 6 | -0.336857 | 1.348374  | -0.273072 |
| 1 | 0.434827  | 2.027287  | 0.103801  |
| 1 | -0.310054 | 1.420108  | -1.381274 |
| 6 | -0.770567 | -2.388501 | 0.232369  |
| 1 | 0.074274  | -2.855329 | -0.285107 |
| 1 | -0.508710 | -2.337848 | 1.296045  |
| 6 | 2.454371  | 0.525696  | 0.237846  |
| 1 | 2.432874  | 1.494591  | -0.272366 |
| 1 | 2.281646  | 0.718483  | 1.303454  |

|   |           |           |           |
|---|-----------|-----------|-----------|
| 6 | -1.683940 | 1.860757  | 0.233722  |
| 1 | -2.509500 | 1.360040  | -0.283162 |
| 1 | -1.770885 | 1.610958  | 1.297973  |
| 6 | -2.013640 | -3.252152 | 0.030331  |
| 1 | -1.841137 | -4.281519 | 0.356252  |
| 1 | -2.863068 | -2.857490 | 0.597557  |
| 1 | -2.303529 | -3.280301 | -1.025726 |
| 6 | -1.812043 | 3.368649  | 0.028442  |
| 1 | -2.790008 | 3.734055  | 0.353231  |
| 1 | -1.045781 | 3.908798  | 0.594087  |
| 1 | -1.691507 | 3.631019  | -1.028362 |
| 6 | 3.824261  | -0.115654 | 0.026809  |
| 1 | 4.629519  | 0.545159  | 0.359026  |
| 1 | 3.908776  | -1.054968 | 0.583072  |
| 1 | 3.992137  | -0.340336 | -1.032161 |

### TS9

|   |           |           |           |
|---|-----------|-----------|-----------|
| 7 | 0.342807  | 0.001313  | -0.352976 |
| 6 | 1.476224  | -0.938621 | -0.365103 |
| 1 | 1.094916  | -1.912659 | -0.044076 |
| 1 | 1.856404  | -1.058280 | -1.398123 |
| 6 | 0.808553  | 1.368316  | -0.625817 |
| 1 | 1.503647  | 1.641635  | 0.173151  |
| 1 | 1.375102  | 1.390011  | -1.576997 |
| 6 | -0.671323 | -0.409356 | -1.331667 |
| 1 | -1.547303 | 0.235305  | -1.195749 |
| 1 | -0.306124 | -0.230373 | -2.361336 |
| 6 | 2.632247  | -0.561286 | 0.558153  |
| 1 | 3.178869  | 0.298859  | 0.157202  |
| 1 | 2.233039  | -0.267385 | 1.534853  |
| 6 | -0.282247 | 2.433706  | -0.670758 |
| 1 | -0.964441 | 2.263833  | -1.510574 |
| 1 | -0.872672 | 2.382809  | 0.251770  |
| 6 | -1.123886 | -1.864642 | -1.208032 |
| 1 | -0.356074 | -2.535207 | -1.606850 |
| 1 | -1.239838 | -2.128373 | -0.149127 |
| 6 | 3.593612  | -1.737313 | 0.717727  |
| 1 | 4.452999  | -1.463066 | 1.334850  |
| 1 | 3.094503  | -2.587048 | 1.194344  |
| 1 | 3.972688  | -2.072367 | -0.254052 |
| 6 | -2.433294 | -2.092883 | -1.960309 |
| 1 | -2.733543 | -3.143036 | -1.925287 |
| 1 | -3.246808 | -1.496790 | -1.531096 |
| 1 | -2.335243 | -1.806422 | -3.012853 |
| 6 | 0.333549  | 3.825930  | -0.800287 |
| 1 | -0.439853 | 4.596359  | -0.854158 |
| 1 | 0.974957  | 4.051614  | 0.057332  |
| 1 | 0.944668  | 3.899893  | -1.706046 |
| 5 | -0.504983 | -0.086374 | 1.778382  |
| 1 | -0.092559 | -1.199886 | 1.881058  |
| 1 | 0.109655  | 0.897579  | 2.050257  |
| 5 | -2.253513 | -0.027896 | 3.091995  |
| 1 | -2.704040 | 1.021605  | 3.470213  |
| 1 | -2.903067 | -1.018152 | 3.304558  |
| 1 | -1.104303 | -0.174902 | 3.523135  |
| 7 | -1.978931 | 0.076996  | 1.480085  |
| 1 | -2.274376 | 0.970232  | 1.101231  |
| 1 | -2.426460 | -0.675706 | 0.967280  |

### P9

|   |           |           |           |
|---|-----------|-----------|-----------|
| 7 | 0.308718  | 0.018322  | -0.216953 |
| 6 | 1.790441  | -0.221881 | -0.195013 |
| 1 | 1.932002  | -1.204964 | 0.257153  |
| 1 | 2.134379  | -0.272189 | -1.238981 |
| 6 | 0.048192  | 1.355210  | -0.842277 |
| 1 | 0.633250  | 2.080366  | -0.275691 |
| 1 | 0.439371  | 1.324167  | -1.869943 |
| 6 | -0.313460 | -1.042202 | -1.068104 |
| 1 | -1.389351 | -0.858528 | -1.082438 |
| 1 | 0.049779  | -0.903401 | -2.096060 |
| 6 | 2.626882  | 0.787522  | 0.584487  |
| 1 | 2.637708  | 1.759200  | 0.080870  |
| 1 | 2.194357  | 0.934267  | 1.577399  |
| 6 | -1.401251 | 1.829858  | -0.839864 |
| 1 | -2.054883 | 1.127006  | -1.369982 |
| 1 | -1.755967 | 1.916273  | 0.193642  |
| 6 | -0.060500 | -2.478910 | -0.616075 |
| 1 | 0.961678  | -2.780134 | -0.865504 |
| 1 | -0.153510 | -2.551851 | 0.472596  |
| 6 | 4.061806  | 0.274030  | 0.705556  |
| 1 | 4.689338  | 0.999463  | 1.228644  |
| 1 | 4.095681  | -0.665099 | 1.266527  |
| 1 | 4.505974  | 0.095813  | -0.279864 |
| 6 | -1.047456 | -3.425446 | -1.297657 |
| 1 | -0.840805 | -4.464185 | -1.029868 |
| 1 | -2.077436 | -3.200086 | -1.001449 |
| 1 | -0.986756 | -3.341888 | -2.387979 |
| 6 | -1.494363 | 3.196538  | -1.519263 |
| 1 | -2.524695 | 3.559141  | -1.514446 |
| 1 | -0.878527 | 3.934879  | -0.996316 |
| 1 | -1.157107 | 3.149268  | -2.559969 |
| 5 | -0.256202 | 0.005357  | 1.363156  |
| 1 | 0.410418  | -0.812096 | 1.948156  |
| 1 | -0.104471 | 1.133911  | 1.747090  |
| 5 | -2.493963 | 0.149561  | 2.782870  |
| 1 | -3.575218 | -0.405524 | 2.819750  |
| 1 | -1.773721 | -0.144287 | 3.711438  |
| 1 | -2.588120 | 1.351805  | 2.618842  |
| 7 | -1.755830 | -0.407043 | 1.414955  |
| 1 | -2.332280 | -0.043763 | 0.658828  |
| 1 | -1.872225 | -1.419424 | 1.400668  |

### <sup>i</sup>PrNH<sub>2</sub>

|   |           |           |           |
|---|-----------|-----------|-----------|
| 7 | 0.015708  | -0.657041 | 0.072881  |
| 1 | -0.145314 | -1.340553 | -0.668068 |
| 6 | -1.219085 | 0.108223  | 0.258416  |
| 1 | -1.095700 | 0.699268  | 1.175160  |
| 6 | -1.558523 | 1.062814  | -0.891499 |
| 1 | -2.511003 | 1.570455  | -0.707205 |
| 1 | -0.791186 | 1.831518  | -1.026004 |
| 1 | -1.648306 | 0.506190  | -1.832862 |
| 6 | 1.223572  | 0.100167  | -0.257569 |
| 1 | 1.114422  | 0.667612  | -1.199748 |
| 6 | 2.366141  | -0.894661 | -0.434764 |
| 1 | 2.138735  | -1.620510 | -1.223661 |
| 1 | 3.292838  | -0.380741 | -0.707431 |

|   |           |           |           |
|---|-----------|-----------|-----------|
| 1 | 2.526352  | -1.444787 | 0.497638  |
| 6 | 1.546444  | 1.091744  | 0.856367  |
| 1 | 0.796081  | 1.884842  | 0.933193  |
| 1 | 1.589294  | 0.564805  | 1.815717  |
| 1 | 2.514815  | 1.567005  | 0.672924  |
| 6 | -2.354073 | -0.883906 | 0.491015  |
| 1 | -3.285211 | -0.366578 | 0.739689  |
| 1 | -2.533996 | -1.476914 | -0.414896 |
| 1 | -2.098634 | -1.568604 | 1.303588  |

**TS10**

|   |           |           |           |
|---|-----------|-----------|-----------|
| 5 | -1.419718 | 0.477709  | -0.021572 |
| 1 | -1.260359 | 1.160410  | 0.940322  |
| 1 | -1.008753 | 0.727555  | -1.111911 |
| 5 | -3.580609 | 0.311800  | -0.246173 |
| 1 | -4.071402 | -0.033071 | -1.289132 |
| 1 | -4.308372 | 0.398951  | 0.707700  |
| 1 | -2.963302 | 1.373908  | -0.402753 |
| 7 | -2.354657 | -0.704479 | 0.118371  |
| 1 | -2.249047 | -1.444425 | -0.566524 |
| 1 | -2.440499 | -1.101302 | 1.047361  |
| 7 | 0.520797  | -0.618601 | 0.408831  |
| 1 | 0.719792  | -0.582379 | 1.409633  |
| 1 | 0.468371  | -1.607789 | 0.164013  |
| 6 | 1.634601  | 0.008109  | -0.326712 |
| 1 | 1.321073  | 0.038952  | -1.377428 |
| 6 | 2.934722  | -0.786302 | -0.214396 |
| 1 | 3.731508  | -0.320378 | -0.802728 |
| 1 | 3.267740  | -0.829070 | 0.829593  |
| 1 | 2.806781  | -1.813098 | -0.574316 |
| 6 | 1.806879  | 1.437843  | 0.169957  |
| 1 | 2.605682  | 1.941119  | -0.381724 |
| 1 | 0.881954  | 2.005661  | 0.050354  |
| 1 | 2.080287  | 1.441074  | 1.232758  |

**P10**

|   |           |           |           |
|---|-----------|-----------|-----------|
| 5 | -1.008696 | 0.374569  | -0.136513 |
| 1 | -0.989579 | 1.326942  | 0.595203  |
| 1 | -0.909654 | 0.609342  | -1.313939 |
| 5 | -3.671809 | 0.257782  | -0.139471 |
| 1 | -3.638576 | 0.577821  | -1.307121 |
| 1 | -4.529862 | -0.569467 | 0.101476  |
| 1 | -3.699230 | 1.201293  | 0.619867  |
| 7 | -2.236251 | -0.519659 | 0.158844  |
| 1 | -2.269973 | -1.362784 | -0.413488 |
| 1 | -2.296723 | -0.817514 | 1.131921  |
| 7 | 0.352614  | -0.504990 | 0.228551  |
| 1 | 0.461322  | -0.568081 | 1.244839  |
| 1 | 0.227326  | -1.465193 | -0.102136 |
| 6 | 1.625118  | 0.024240  | -0.355220 |
| 1 | 1.440414  | 0.065265  | -1.432849 |
| 6 | 2.776247  | -0.926579 | -0.052103 |
| 1 | 3.694013  | -0.567728 | -0.525106 |
| 1 | 2.958433  | -0.986161 | 1.027275  |
| 1 | 2.578900  | -1.936503 | -0.427419 |
| 6 | 1.881099  | 1.429631  | 0.167913  |
| 1 | 2.824796  | 1.802941  | -0.238386 |
| 1 | 1.078445  | 2.110736  | -0.117064 |

|   |          |          |          |
|---|----------|----------|----------|
| 1 | 1.963148 | 1.426127 | 1.261551 |
|---|----------|----------|----------|

**Pr<sub>2</sub>NH**

|   |           |           |           |
|---|-----------|-----------|-----------|
| 7 | 0.015708  | -0.657041 | 0.072881  |
| 1 | -0.145314 | -1.340553 | -0.668068 |
| 6 | -1.219085 | 0.108223  | 0.258416  |
| 1 | -1.095700 | 0.699268  | 1.175160  |
| 6 | -1.558523 | 1.062814  | -0.891499 |
| 1 | -2.511003 | 1.570455  | -0.707205 |
| 1 | -0.791186 | 1.831518  | -1.026004 |
| 1 | -1.648306 | 0.506190  | -1.832862 |
| 6 | 1.223572  | 0.100167  | -0.257569 |
| 1 | 1.114422  | 0.667612  | -1.199748 |
| 6 | 2.366141  | -0.894661 | -0.434764 |
| 1 | 2.138735  | -1.620510 | -1.223661 |
| 1 | 3.292838  | -0.380741 | -0.707431 |
| 1 | 2.526352  | -1.444787 | 0.497638  |
| 6 | 1.546444  | 1.091744  | 0.856367  |
| 1 | 0.796081  | 1.884842  | 0.933193  |
| 1 | 1.589294  | 0.564805  | 1.815717  |
| 1 | 2.514815  | 1.567005  | 0.672924  |
| 6 | -2.354073 | -0.883906 | 0.491015  |
| 1 | -3.285211 | -0.366578 | 0.739689  |
| 1 | -2.533996 | -1.476914 | -0.414896 |
| 1 | -2.098634 | -1.568604 | 1.303588  |

**TS11**

|   |           |           |           |
|---|-----------|-----------|-----------|
| 5 | 1.498560  | -1.046913 | 0.018830  |
| 1 | 1.081272  | -1.346456 | 1.092411  |
| 1 | 1.362636  | -1.685311 | -0.974814 |
| 5 | 3.712792  | -1.024267 | 0.307697  |
| 1 | 4.464912  | -1.059251 | -0.631864 |
| 1 | 4.182193  | -0.713616 | 1.372186  |
| 1 | 3.091781  | -2.081690 | 0.402704  |
| 7 | 2.517461  | 0.057483  | -0.045442 |
| 1 | 2.661492  | 0.478089  | -0.956700 |
| 1 | 2.458961  | 0.781572  | 0.662025  |
| 7 | -0.534488 | -0.019433 | -0.416237 |
| 1 | -0.628371 | -0.169495 | -1.422763 |
| 6 | -1.529217 | -0.892404 | 0.254150  |
| 1 | -1.224660 | -0.958196 | 1.305984  |
| 6 | -2.970099 | -0.375790 | 0.184114  |
| 1 | -3.645531 | -1.114364 | 0.625414  |
| 1 | -3.115380 | 0.564276  | 0.723121  |
| 1 | -3.275661 | -0.224269 | -0.858698 |
| 6 | -0.705983 | 1.423965  | -0.159992 |
| 1 | -1.735042 | 1.728154  | -0.403235 |
| 6 | 0.214575  | 2.236345  | -1.066726 |
| 1 | 0.137362  | 1.908567  | -2.109460 |
| 1 | -0.064477 | 3.293171  | -1.028461 |
| 1 | 1.259789  | 2.160594  | -0.758790 |
| 6 | -0.456162 | 1.734768  | 1.312238  |
| 1 | -1.203777 | 1.270530  | 1.961913  |
| 1 | 0.526160  | 1.363720  | 1.622418  |
| 1 | -0.489569 | 2.814973  | 1.481776  |
| 6 | -1.457244 | -2.291350 | -0.352931 |
| 1 | -2.187635 | -2.945770 | 0.130887  |
| 1 | -1.701355 | -2.255182 | -1.422575 |

1 -0.467893 -2.733712 -0.239485

**P11**

5 0.941504 -0.982376 0.120893  
1 0.773285 -1.192212 1.295270  
1 0.892304 -1.946494 -0.592035  
5 3.572525 -1.263957 0.227154  
1 3.510725 -2.175928 -0.567926  
1 4.555529 -0.564891 0.070129  
1 3.424041 -1.615072 1.377290  
7 2.290403 -0.268921 -0.118349  
1 2.435392 0.021349 -1.083806  
1 2.436382 0.552885 0.463907  
7 -0.410124 -0.077075 -0.342097  
1 -0.497209 -0.209358 -1.354462  
6 -1.633299 -0.735495 0.263090  
1 -1.445911 -0.744430 1.340059  
6 -2.929461 0.020547 -0.032401  
1 -3.772121 -0.589475 0.302243  
1 -3.001914 0.979957 0.484888  
1 -3.054688 0.191120 -1.108813  
6 -0.383501 1.411626 -0.120294  
1 -1.373746 1.779003 -0.400705  
6 0.596263 2.120994 -1.055979  
1 0.548350 1.716472 -2.073406  
1 0.316489 3.176741 -1.111693  
1 1.630092 2.076754 -0.714629  
6 -0.144178 1.743595 1.346120  
1 -0.937781 1.348351 1.986472  
1 0.805602 1.337035 1.702428  
1 -0.123633 2.830076 1.468962  
6 -1.749793 -2.178260 -0.225209  
1 -2.683764 -2.602801 0.151976  
1 -1.783783 -2.217231 -1.321181  
1 -0.921931 -2.796245 0.115959

**<sup>i</sup>Pr<sub>2</sub>MeN**

7 0.043653 0.436741 -0.269119  
6 -0.159365 1.726378 0.377189  
1 0.595070 2.441200 0.041183  
1 -1.131093 2.137159 0.098179  
1 -0.111269 1.673202 1.480163  
6 1.266923 -0.209642 0.230533  
1 1.221334 -0.318550 1.332943  
6 2.488077 0.654517 -0.097848  
1 2.494339 1.599993 0.449004  
1 3.405816 0.120799 0.165484  
1 2.504915 0.872916 -1.170944  
6 1.468634 -1.599617 -0.374252  
1 2.464753 -1.969406 -0.115731  
1 0.744483 -2.331858 -0.007567  
1 1.392659 -1.548413 -1.466057  
6 -1.155956 -0.417289 -0.221615  
1 -0.898331 -1.323500 -0.776792  
6 -1.590019 -0.828148 1.191346  
1 -2.457357 -1.494658 1.146406  
1 -0.790837 -1.352578 1.725776  
1 -1.875226 0.048609 1.783321

6 -2.319698 0.219808 -0.982861  
1 -1.967326 0.633476 -1.931935  
1 -3.080881 -0.538179 -1.191658  
1 -2.808200 1.016567 -0.412892

**TS12**

7 -0.432709 -0.013034 0.269636  
6 -0.275024 0.207856 1.706994  
1 0.335665 -0.587744 2.139073  
1 0.237854 1.152707 1.891832  
1 -1.236574 0.224490 2.244882  
6 -1.252569 -1.235265 0.033221  
1 -2.252849 -1.069035 0.468402  
6 -0.674321 -2.464234 0.740916  
1 -0.742478 -2.389609 1.828811  
1 -1.251285 -3.344613 0.444643  
1 0.368485 -2.634302 0.462444  
6 -1.420310 -1.520483 -1.459787  
1 -1.940996 -2.473557 -1.586789  
1 -2.012233 -0.757418 -1.971383  
1 -0.447210 -1.593219 -1.952760  
6 -1.007526 1.178855 -0.421133  
1 -0.899590 0.966911 -1.488952  
6 -2.487769 1.440800 -0.116362  
1 -2.802366 2.361284 -0.617098  
1 -3.141894 0.637344 -0.464284  
1 -2.654349 1.578201 0.957941  
6 -0.206477 2.453763 -0.151589  
1 0.866917 2.296138 -0.279280  
1 -0.510262 3.217011 -0.873536  
1 -0.396196 2.861471 0.846459  
5 1.658235 -0.295841 -0.715034  
1 1.535372 -1.471130 -0.821241  
1 1.352626 0.484077 -1.558335  
5 3.865798 -0.011131 -0.520490  
1 4.336201 1.081105 -0.709899  
1 4.575423 -0.827173 0.008861  
1 3.392228 -0.461546 -1.563336  
7 2.524627 0.182468 0.419931  
1 2.414644 1.147338 0.713414  
1 2.553251 -0.417665 1.237232

**P12**

7 0.361772 -0.029906 0.203679  
6 0.310713 -0.198040 1.675554  
1 0.117129 0.769494 2.139370  
1 -0.499040 -0.880836 1.935992  
1 1.251690 -0.603820 2.056956  
6 1.676223 0.649245 -0.186406  
1 2.442624 -0.127196 -0.091909  
6 2.067356 1.790891 0.752296  
1 2.274646 1.457905 1.771362  
1 2.987450 2.237122 0.365057  
1 1.300222 2.567581 0.775793  
6 1.676012 1.158516 -1.628249  
1 2.703165 1.435722 -1.882930  
1 1.342484 0.417020 -2.355911  
1 1.041028 2.039867 -1.730413

|   |           |           |           |   |           |           |           |
|---|-----------|-----------|-----------|---|-----------|-----------|-----------|
| 6 | 0.298554  | -1.397334 | -0.471987 | 6 | 1.134615  | 2.433926  | 0.164807  |
| 1 | 0.580350  | -1.197105 | -1.507000 | 1 | 1.204920  | 2.479237  | 1.254522  |
| 6 | 1.268980  | -2.419559 | 0.127148  | 1 | 1.857175  | 3.151315  | -0.234840 |
| 1 | 1.293385  | -3.291775 | -0.531493 | 1 | 0.135061  | 2.756828  | -0.134458 |
| 1 | 2.295604  | -2.060126 | 0.226047  | 6 | 1.493428  | 1.095631  | -1.916263 |
| 1 | 0.927765  | -2.764868 | 1.108148  | 1 | 2.102241  | 1.949981  | -2.225880 |
| 6 | -1.105856 | -1.998758 | -0.495207 | 1 | 1.942273  | 0.203571  | -2.360575 |
| 1 | -1.839575 | -1.349873 | -0.979073 | 1 | 0.491282  | 1.226422  | -2.330977 |
| 1 | -1.057964 | -2.931548 | -1.064663 | 6 | 0.848632  | -1.347233 | -0.437319 |
| 1 | -1.452772 | -2.268265 | 0.509702  | 1 | 0.737217  | -1.223701 | -1.516918 |
| 5 | -0.904601 | 0.938883  | -0.306937 | 6 | 2.271985  | -1.849971 | -0.164279 |
| 1 | -0.569621 | 2.073734  | -0.083674 | 1 | 2.419826  | -2.813018 | -0.661392 |
| 1 | -1.040310 | 0.683589  | -1.471914 | 1 | 3.032593  | -1.163961 | -0.547076 |
| 5 | -3.555050 | 1.012840  | -0.364260 | 1 | 2.455991  | -2.000569 | 0.905023  |
| 1 | -3.607402 | 0.160590  | -1.232536 | 6 | -0.187011 | -2.397980 | -0.029931 |
| 1 | -4.482216 | 0.940902  | 0.418957  | 1 | -1.159230 | -2.192157 | -0.483201 |
| 1 | -3.392497 | 2.126319  | -0.812957 | 1 | 0.133205  | -3.378513 | -0.393930 |
| 7 | -2.203199 | 0.655377  | 0.509280  | 1 | -0.308518 | -2.483726 | 1.055043  |
| 1 | -2.341755 | -0.305870 | 0.810816  | 6 | -0.447291 | 0.636098  | 2.400398  |
| 1 | -2.238031 | 1.224763  | 1.352646  | 1 | -0.133678 | 0.842870  | 3.428349  |

### **<sup>i</sup>Pr<sub>2</sub>EtN**

|   |           |           |           |
|---|-----------|-----------|-----------|
| 7 | 0.044896  | 0.133941  | -0.129303 |
| 6 | -0.235936 | 1.323416  | 0.685639  |
| 1 | -1.222693 | 1.237853  | 1.155081  |
| 1 | 0.473327  | 1.383507  | 1.522343  |
| 6 | 1.310147  | -0.512859 | 0.245071  |
| 1 | 1.317557  | -0.760984 | 1.325149  |
| 6 | 2.474475  | 0.443568  | -0.024827 |
| 1 | 2.387448  | 1.377804  | 0.536237  |
| 1 | 3.422455  | -0.024852 | 0.257790  |
| 1 | 2.506300  | 0.688392  | -1.091900 |
| 6 | 1.554286  | -1.804413 | -0.534774 |
| 1 | 2.571313  | -2.157945 | -0.342034 |
| 1 | 0.868851  | -2.608503 | -0.254582 |
| 1 | 1.454554  | -1.618448 | -1.610000 |
| 6 | -1.109266 | -0.766455 | -0.264547 |
| 1 | -0.807072 | -1.546422 | -0.970006 |
| 6 | -1.534826 | -1.454364 | 1.040243  |
| 1 | -2.350801 | -2.160513 | 0.855096  |
| 1 | -0.703383 | -2.009968 | 1.486927  |
| 1 | -1.887654 | -0.727158 | 1.779729  |
| 6 | -2.284852 | -0.041469 | -0.919758 |
| 1 | -1.963837 | 0.428101  | -1.853861 |
| 1 | -3.085393 | -0.754088 | -1.141774 |
| 1 | -2.707340 | 0.733430  | -0.271066 |
| 6 | -0.185183 | 2.610135  | -0.133287 |
| 1 | -0.385458 | 3.485817  | 0.493722  |
| 1 | 0.795648  | 2.732324  | -0.601379 |
| 1 | -0.931163 | 2.578708  | -0.932911 |

### **TS13**

|   |          |           |           |
|---|----------|-----------|-----------|
| 7 | 0.547568 | -0.006978 | 0.153335  |
| 6 | 0.688709 | -0.036315 | 1.632992  |
| 1 | 0.760276 | -1.072568 | 1.970386  |
| 1 | 1.646497 | 0.423505  | 1.912735  |
| 6 | 1.464978 | 1.045918  | -0.388591 |
| 1 | 2.486204 | 0.811164  | -0.042677 |

|   |           |           |           |
|---|-----------|-----------|-----------|
| 6 | 1.134615  | 2.433926  | 0.164807  |
| 1 | 1.204920  | 2.479237  | 1.254522  |
| 1 | 1.857175  | 3.151315  | -0.234840 |
| 1 | 0.135061  | 2.756828  | -0.134458 |
| 6 | 1.493428  | 1.095631  | -1.916263 |
| 1 | 2.102241  | 1.949981  | -2.225880 |
| 1 | 1.942273  | 0.203571  | -2.360575 |
| 1 | 0.491282  | 1.226422  | -2.330977 |
| 6 | 0.848632  | -1.347233 | -0.437319 |
| 1 | 0.737217  | -1.223701 | -1.516918 |
| 6 | 2.271985  | -1.849971 | -0.164279 |
| 1 | 2.419826  | -2.813018 | -0.661392 |
| 1 | 3.032593  | -1.163961 | -0.547076 |
| 1 | 2.455991  | -2.000569 | 0.905023  |
| 6 | -0.187011 | -2.397980 | -0.029931 |
| 1 | -1.159230 | -2.192157 | -0.483201 |
| 1 | 0.133205  | -3.378513 | -0.393930 |
| 1 | -0.308518 | -2.483726 | 1.055043  |
| 6 | -0.447291 | 0.636098  | 2.400398  |
| 1 | -0.133678 | 0.842870  | 3.428349  |
| 1 | -0.746109 | 1.580813  | 1.937782  |
| 1 | -1.323471 | -0.015535 | 2.453996  |
| 5 | -3.838510 | 0.037690  | -0.934181 |
| 1 | -4.039584 | -1.101289 | -1.277690 |
| 1 | -4.754129 | 0.598085  | -0.385806 |
| 5 | -1.573346 | 0.451168  | -0.854709 |
| 1 | -1.413101 | 1.624460  | -0.921435 |
| 1 | -1.250072 | -0.304195 | -1.710314 |
| 1 | -3.395547 | 0.708394  | -1.857591 |
| 7 | -2.578609 | -0.020498 | 0.147992  |
| 1 | -2.744481 | 0.620270  | 0.916235  |
| 1 | -2.468543 | -0.960084 | 0.514962  |

### **P13**

|   |           |           |           |
|---|-----------|-----------|-----------|
| 7 | -0.360876 | 0.087430  | 0.048307  |
| 6 | -0.346732 | -0.163915 | 1.531789  |
| 1 | 0.358353  | 0.552908  | 1.956786  |
| 1 | -1.334280 | 0.113144  | 1.914991  |
| 6 | -1.696563 | -0.362945 | -0.550136 |
| 1 | -2.426893 | 0.372921  | -0.199529 |
| 6 | -2.175024 | -1.729139 | -0.061876 |
| 1 | -2.314851 | -1.778018 | 1.019696  |
| 1 | -3.149912 | -1.914431 | -0.521929 |
| 1 | -1.499669 | -2.527284 | -0.376982 |
| 6 | -1.706721 | -0.360596 | -2.080455 |
| 1 | -2.742151 | -0.508383 | -2.401828 |
| 1 | -1.353356 | 0.570169  | -2.525924 |
| 1 | -1.100851 | -1.176282 | -2.477791 |
| 6 | -0.242754 | 1.601099  | -0.172883 |
| 1 | -0.499062 | 1.735231  | -1.224048 |
| 6 | -1.203776 | 2.435563  | 0.682074  |
| 1 | -1.177925 | 3.461607  | 0.305376  |
| 1 | -2.244600 | 2.106606  | 0.646040  |
| 1 | -0.889096 | 2.469168  | 1.729446  |
| 6 | 1.176311  | 2.138897  | 0.007971  |
| 1 | 1.903605  | 1.655894  | -0.648711 |
| 1 | 1.158274  | 3.203531  | -0.243475 |
| 1 | 1.515960  | 2.074730  | 1.048869  |

|   |           |           |           |
|---|-----------|-----------|-----------|
| 6 | 0.037263  | -1.578959 | 1.995594  |
| 1 | -0.699650 | -1.960076 | 2.706665  |
| 1 | 0.098597  | -2.285557 | 1.168554  |
| 1 | 1.005528  | -1.571044 | 2.501753  |
| 5 | 3.532561  | -0.666673 | -0.907728 |
| 1 | 3.548955  | 0.444035  | -1.405608 |
| 1 | 4.476930  | -0.859262 | -0.166169 |
| 5 | 0.869959  | -0.685343 | -0.778140 |
| 1 | 0.511291  | -1.820008 | -0.969449 |
| 1 | 0.993706  | -0.051564 | -1.789799 |
| 1 | 3.387010  | -1.541974 | -1.733042 |
| 7 | 2.194468  | -0.710938 | 0.050700  |
| 1 | 2.264034  | -1.570047 | 0.591216  |
| 1 | 2.310288  | 0.048589  | 0.718712  |
